# Supplementary material
Source: publisher figshare collection journal article supplement (https://gsajournals.figshare.com/ndownloader/files/24712217)
Supplement: Supplementary file 1 [file 24712217]

## Sheet: Sheet1
											Ancestor_Genetic_Contribution
Set	Accession_ID	Alias	Taxon	Giant_Component	Structural_Role	In_Degree	Out_Degree	Total_Degree	Betweenness	Founder_Contribution	Mean_Kinship	Coancestry
Cosmopolitan	PI551593	Howard_17	Fragaria x ananassa	Giant_Component	Globally_Central	2	99	101	47942.5	NA	0.0155878	0.0437537
Cosmopolitan	PI551479	Fairfax	Fragaria x ananassa	Giant_Component	Globally_Central	2	91	93	13090.4	NA	0.0103418	0.0190349
Cosmopolitan	Hovey	Hovey	Fragaria x ananassa	Giant_Component	Globally_Central	2	19	21	12390.6	NA	0.0108266	0.0181304
Cosmopolitan	63C120P011	Tufts	Fragaria x ananassa	Giant_Component	Globally_Central	2	12	14	16579.3	NA	0.00558671	0.0139253
Cosmopolitan	Crescent	Crescent	Fragaria x ananassa	Giant_Component	Globally_Central	2	59	61	16803.7	NA	0.013852	0.0128313
Cosmopolitan	PI551630	Aberdeen	Fragaria x ananassa	Giant_Component	Globally_Central	2	35	37	7908.63	NA	0.00442799	0.012429
Cosmopolitan	Sharpless	Sharpless	Fragaria x ananassa	Giant_Component	Globally_Central	1	51	52	11727	NA	0.00520305	0.0119871
Cosmopolitan	PI551421	Blakemore	Fragaria x ananassa	Giant_Component	Globally_Central	2	49	51	13265.9	NA	0.00845036	0.011744
Cosmopolitan	Wilson	Wilson	Fragaria x ananassa	Giant_Component	Globally_Central	2	51	53	4012.55	NA	0.00739723	0.00980129
Cosmopolitan	PI551615	Royal_Sovereign	Fragaria x ananassa	Giant_Component	Globally_Central	2	23	25	19373	NA	0.00394712	0.00878093
Cosmopolitan	PI551536	Harunoka	Fragaria x ananassa	Giant_Component	Globally_Central	2	24	26	6193.57	NA	0.00315262	0.00864953
Cosmopolitan	72C266P604	Douglas	Fragaria x ananassa	Giant_Component	Globally_Central	2	23	25	22433.6	NA	0.00519168	0.00839726
Cosmopolitan	PI551483	Gorella	Fragaria x ananassa	Giant_Component	Globally_Central	2	41	43	12053.2	NA	0.00345585	0.00724944
Cosmopolitan	Hoffman	Hoffman	Fragaria x ananassa	Giant_Component	Globally_Central	1	17	18	5737.96	NA	0.00431032	0.0067479
Cosmopolitan	PI551842	Marshall	Fragaria x ananassa	Giant_Component	Locally_Central	0	58	58	0	0.0349555	0.00305636	0.00657562
Cosmopolitan	PI551653	Holiday	Fragaria x ananassa	Giant_Component	Globally_Central	2	39	41	6157.43	NA	0.00333136	0.00635343
Cosmopolitan	PI264680	Senga_Sengana	Fragaria x ananassa	Giant_Component	Globally_Central	2	58	60	3258	NA	0.00225173	0.00619406
Cosmopolitan	Bubach	Bubach	Fragaria x ananassa	Giant_Component	Locally_Central	0	56	56	0	0.0276994	0.002202	0.00617596
Cosmopolitan	PI616627	Reiko	Fragaria x ananassa	Giant_Component	Globally_Central	2	19	21	2765.98	NA	0.0030081	0.00576797
Cosmopolitan	Cumberland_Triumph	Cumberland_Triumph	Fragaria x ananassa	Giant_Component	Globally_Central	2	12	14	10544.7	NA	0.0046528	0.00541749
Cosmopolitan	PI551559	Sparkle	Fragaria x ananassa	Giant_Component	Globally_Central	2	24	26	6003.14	NA	0.00480977	0.00532704
Cosmopolitan	36C003P001	Lassen	Fragaria x ananassa	Giant_Component	Globally_Central	2	7	9	18305.5	NA	0.00491561	0.00527342
Cosmopolitan	PI551828	Dunlap	Fragaria x ananassa	Giant_Component	Globally_Central	2	43	45	2235.18	NA	0.00267504	0.00491255
Cosmopolitan	77C032P103	Chandler	Fragaria x ananassa	Giant_Component	Globally_Central	1	59	60	6125.95	NA	0.00234459	0.0048399
Cosmopolitan	63C007P101	63C007P101	Fragaria x ananassa	Giant_Component	Globally_Central	2	2	4	9314.27	NA	0.00347659	0.00460828
Cosmopolitan	PI617007	Hokowase	Fragaria x ananassa	Giant_Component	Globally_Central	2	25	27	6427.9	NA	0.00194238	0.00457993
Cosmopolitan	British_Queen	British_Queen	Fragaria x ananassa	Giant_Component	Locally_Central	0	25	25	0	0.0272789	0.00216946	0.00457915
Cosmopolitan	Valentine_1941	Valentine_1941	Fragaria x ananassa	Giant_Component	Globally_Central	2	23	25	6332.47	NA	0.0025717	0.00440607
Cosmopolitan	PI551532	Midland	Fragaria x ananassa	Giant_Component	Globally_Central	2	31	33	18115.5	NA	0.0045845	0.00425804
Cosmopolitan	Missionary	Missionary	Fragaria x ananassa	Giant_Component	Globally_Central	2	29	31	9113.19	NA	0.00440455	0.00416517
Cosmopolitan	Pan_American	Pan_American	Fragaria x ananassa	Giant_Component	Globally_Central	1	22	23	2526.92	NA	0.00161575	0.00398436
Cosmopolitan	PI551598	Surecrop	Fragaria x ananassa	Giant_Component	Globally_Central	2	21	23	3941.83	NA	0.00292109	0.00387179
Cosmopolitan	PI551626	Deutsch_Evern	Fragaria x ananassa	Giant_Component	Globally_Central	2	20	22	1812.25	NA	0.00143177	0.00367894
Cosmopolitan	71C098P605	71C098P605	Fragaria x ananassa	Giant_Component	Globally_Central	2	4	6	6310.78	NA	0.00379439	0.00364502
Cosmopolitan	71C101P611	Pajaro	Fragaria x ananassa	Giant_Component	Globally_Central	2	33	35	12057	NA	0.00211249	0.00356934
Cosmopolitan	Tennessee_Shipper	Tennessee_Shipper	Fragaria x ananassa	Giant_Component	Globally_Central	2	15	17	3087.01	NA	0.00400107	0.00342842
Cosmopolitan	PI551530	Redgauntlet	Fragaria x ananassa	Giant_Component	Globally_Central	2	35	37	2998.81	NA	0.00149551	0.003374
Cosmopolitan	77C030P605	Parker	Fragaria x ananassa	Giant_Component	Globally_Central	2	25	27	4252.17	NA	0.00262094	0.00330303
Cosmopolitan	75C071P107	Selva	Fragaria x ananassa	Giant_Component	Globally_Central	2	48	50	7417.53	NA	0.00203646	0.00317891
Cosmopolitan	53C009P002	Tioga	Fragaria x ananassa	Giant_Component	Globally_Central	2	45	47	19964.2	NA	0.0055251	0.0030924
Cosmopolitan	Laxton's_Noble	Noble	Fragaria x ananassa	Giant_Component	Globally_Central	2	14	16	11966.4	NA	0.00351065	0.00289408
Cosmopolitan	Jersey_Queen	Jersey_Queen	Fragaria x ananassa	Giant_Component	Locally_Central	0	13	13	0	0.0162497	0.00131601	0.00286011
Cosmopolitan	PI616632	Toyonoka	Fragaria x ananassa	Giant_Component	Globally_Central	2	32	34	5465.63	NA	0.00172564	0.00282599
Cosmopolitan	Warfield	Warfield	Fragaria x ananassa	Giant_Component	Globally_Central	2	26	28	395.067	NA	0.00130107	0.00265501
Cosmopolitan	PI551534	Belrubi	Fragaria x ananassa	Giant_Component	Globally_Central	2	16	18	3831	NA	0.00154798	0.00261648
Cosmopolitan	PI617010	Nyoho	Fragaria x ananassa	Giant_Component	Globally_Central	2	22	24	2323.82	NA	0.00171413	0.00255945
Cosmopolitan	PI551588	Honeoye	Fragaria x ananassa	Giant_Component	Globally_Central	2	38	40	4984.8	NA	0.001435	0.00252528
Cosmopolitan	Gandy	Gandy	Fragaria x ananassa	Giant_Component	Globally_Central	2	24	26	2995.83	NA	0.00144723	0.00247755
Cosmopolitan	Rockhill	Rockhill	Fragaria x ananassa	Giant_Component	Globally_Central	2	19	21	2312.25	NA	0.000983111	0.00239438
Cosmopolitan	PI679851	Akihime	Fragaria x ananassa	Giant_Component	Globally_Central	2	17	19	1080.86	NA	0.00161219	0.00238447
Cosmopolitan	PI551579	Elsanta	Fragaria x ananassa	Giant_Component	Globally_Central	2	37	39	4596.25	NA	0.00119803	0.0022915
Cosmopolitan	Miner	Miner	Fragaria x ananassa	Giant_Component	Locally_Central	0	10	10	0	0.00857482	0.000809971	0.00227352
Cosmopolitan	Chesapeake	Chesapeake	Fragaria x ananassa	Giant_Component	Locally_Central	0	19	20	0	0.0415262	0.00327195	0.00227276
Cosmopolitan	Ettersburg_20	Ettersburg_20	Fragaria x ananassa	Giant_Component	Globally_Central	2	10	12	11980.7	NA	0.00131918	0.00223326
Cosmopolitan	Haverland	Haverland	Fragaria x ananassa	Giant_Component	Globally_Central	2	23	25	5364	NA	0.00724015	0.00209626
Cosmopolitan	Onebor	Onebor	Fragaria x ananassa	Giant_Component	Globally_Central	2	26	28	1912.67	NA	0.000858245	0.00207571
Cosmopolitan	William_Belt	William_Belt	Fragaria x ananassa	Giant_Component	Locally_Central	0	15	15	0	0.00875391	0.00124117	0.0020709
Cosmopolitan	PI641175	Aiberry	Fragaria x ananassa	Giant_Component	Globally_Central	2	18	20	3115.94	NA	0.00141661	0.00203718
Cosmopolitan	Keens_Seedling	Keens_Seedling	Fragaria x ananassa	Giant_Component	Globally_Central	1	9	10	4410.26	NA	0.00763779	0.00201919
Cosmopolitan	PI551435	Albritton	Fragaria x ananassa	Giant_Component	Globally_Central	2	11	13	5984.37	NA	0.00175751	0.00201273
Cosmopolitan	PI551423	Fairland	Fragaria x ananassa	Giant_Component	Globally_Central	2	6	8	3434.45	NA	0.00393205	0.00200539
Cosmopolitan	PI551623	Jucunda	Fragaria x ananassa	Giant_Component	Locally_Central	0	19	19	0	0.0328738	0.00266099	0.00192093
Cosmopolitan	88C024P603	Camarosa	Fragaria x ananassa	Giant_Component	Globally_Central	2	23	25	4478.99	NA	0.000802746	0.00190616
Cosmopolitan	Jessie	Jessie	Fragaria x ananassa	Giant_Component	Locally_Central	2	22	24	141.5	NA	0.000680924	0.00189075
Cosmopolitan	PI551506	Puget_Beauty	Fragaria x ananassa	Giant_Component	Globally_Central	2	8	10	5755.15	NA	0.00109437	0.00188416
Cosmopolitan	Parker_Earle	Parker_Earle	Fragaria x ananassa	Giant_Component	Locally_Central	2	17	19	274	NA	0.000751568	0.00185992
Cosmopolitan	Triomphe_de_Gand	Triomphe_de_Gand	Fragaria x ananassa	Giant_Component	Locally_Central	0	20	20	0	0.00435246	0.000629672	0.00176744
Cosmopolitan	PI551609	Redglow	Fragaria x ananassa	Giant_Component	Globally_Central	2	9	11	2552.07	NA	0.00336776	0.00171606
Cosmopolitan	PI551904	Ettersburg_121	Fragaria x ananassa	Giant_Component	Globally_Central	2	23	25	2636	NA	0.000919097	0.00168813
Cosmopolitan	Georg_Soltwedel	Georg_Soltwedel	Fragaria x ananassa	Giant_Component	Globally_Central	2	10	12	763.417	NA	0.000710074	0.00167367
Cosmopolitan	Excelsior_1892	Excelsior_1892	Fragaria x ananassa	Giant_Component	Globally_Central	2	9	11	762.984	NA	0.00153991	0.00165697
Cosmopolitan	PI666637	Talisman	Fragaria x ananassa	Giant_Component	Globally_Central	2	11	13	1422.62	NA	0.00102466	0.00164539
Cosmopolitan	PI551581	Korona	Fragaria x ananassa	Giant_Component	Globally_Central	2	23	25	2874.35	NA	0.000775567	0.00162101
Cosmopolitan	PI551394	Earliglow	Fragaria x ananassa	Giant_Component	Globally_Central	2	28	30	3951.3	NA	0.000982425	0.00161715
Cosmopolitan	Aroma	Aroma	Fragaria x ananassa	Giant_Component	Globally_Central	1	17	18	1427.13	NA	0.0010471	0.00159532
Cosmopolitan	Autumn	Autumn	Fragaria x ananassa	Giant_Component	Locally_Central	1	9	10	52.5	NA	0.000797064	0.00156128
Cosmopolitan	Nich_Ohmer	Nich_Ohmer	Fragaria x ananassa	Giant_Component	Globally_Central	1	17	18	1236	NA	0.00304781	0.00154364
Cosmopolitan	Louis_Gauthier	Louis_Gauthier	Fragaria x ananassa	Giant_Component	Locally_Central	2	11	13	145.5	NA	0.000558742	0.00153366
Cosmopolitan	PI551797	Earlibelle	Fragaria x ananassa	Giant_Component	Globally_Central	2	21	23	9563.42	NA	0.00131226	0.00153001
Cosmopolitan	PI551564	Klondike	Fragaria x ananassa	Giant_Component	Globally_Central	2	23	25	2335	NA	0.00195762	0.00152456
Cosmopolitan	PI551427	Tennessee_Beauty	Fragaria x ananassa	Giant_Component	Globally_Central	2	8	10	3910.24	NA	0.00153403	0.00151375
Cosmopolitan	PI551414	Jerseybelle	Fragaria x ananassa	Giant_Component	Globally_Central	2	8	10	6107.34	NA	0.00284014	0.00149706
Cosmopolitan	Festivalnaja	Festivalnaja	Fragaria x ananassa	Giant_Component	Globally_Central	2	13	15	717.333	NA	0.000583328	0.00147971
Cosmopolitan	President	President	Fragaria x ananassa	Giant_Component	Locally_Central	0	13	13	0	0.00214075	0.0005171	0.00145146
Cosmopolitan	Gariguette	Gariguette	Fragaria x ananassa	Giant_Component	Globally_Central	2	14	16	1511.07	NA	0.000601768	0.00143861
Cosmopolitan	PI551632	Madame_Moutot	Fragaria x ananassa	Giant_Component	Globally_Central	2	9	11	746.786	NA	0.000563661	0.00143347
Cosmopolitan	Russell's_Prolific	Russell's_Prolific	Fragaria x ananassa	Giant_Component	Locally_Central	2	12	14	87	NA	0.000634248	0.00143347
Cosmopolitan	NC_1768	NC_1768	Fragaria x ananassa	Giant_Component	Globally_Central	2	6	8	5112.07	NA	0.00122111	0.00142824
Cosmopolitan	Early_Ozark	Early_Ozark	Fragaria x ananassa	Giant_Component	Globally_Central	2	16	18	2552.12	NA	0.00134569	0.0014232
Cosmopolitan	PI664317	Sweet_Charlie	Fragaria x ananassa	Giant_Component	Globally_Central	2	15	17	4347.86	NA	0.000752521	0.00140911
Cosmopolitan	63C125P039	Aiko	Fragaria x ananassa	Giant_Component	Globally_Central	2	13	15	2984.26	NA	0.000995204	0.00133788
Cosmopolitan	81C043P603	Oso_Grande	Fragaria x ananassa	Giant_Component	Globally_Central	2	13	15	3674.94	NA	0.000875223	0.00128961
Cosmopolitan	PI616500	Cambridge_Favourite	Fragaria x ananassa	Giant_Component	Globally_Central	2	12	14	1215.19	NA	0.000557313	0.00128191
Cosmopolitan	Sachinoka	Sachinoka	Fragaria x ananassa	Giant_Component	Globally_Central	2	14	16	2752.99	NA	0.000758303	0.0012742
Cosmopolitan	Sample	Sample	Fragaria x ananassa	Giant_Component	Locally_Central	1	13	14	14	NA	0.00045395	0.0012742
Cosmopolitan	PI231088	Fukuba	Fragaria x ananassa	Giant_Component	Globally_Central	2	8	10	1718.25	NA	0.00290497	0.00126007
Cosmopolitan	Dukat	Dukat	Fragaria x ananassa	Giant_Component	Globally_Central	2	10	12	868.667	NA	0.000576301	0.00125365
Cosmopolitan	PI551501	Totem	Fragaria x ananassa	Giant_Component	Globally_Central	2	51	53	7413.47	NA	0.000589956	0.00123784
Cosmopolitan	Brandywine	Brandywine	Fragaria x ananassa	Giant_Component	Locally_Central	2	15	17	126.5	NA	0.000458297	0.0012331
Cosmopolitan	Green_Prolific	Green_Prolific	Fragaria x ananassa	Giant_Component	Globally_Central	2	9	11	5563.5	NA	0.00495526	0.0012331
Cosmopolitan	Superb	Superb	Fragaria x ananassa	Giant_Component	Globally_Central	2	7	9	394	NA	0.00064072	0.00123181
Cosmopolitan	Twentieth_Century	Twentieth_Century	Fragaria x ananassa	Giant_Component	Globally_Central	2	25	27	904.667	NA	0.000515583	0.00122796
Cosmopolitan	Dawn	Dawn	Fragaria x ananassa	Giant_Component	Locally_Central	1	10	11	15	NA	0.000431984	0.00121254
Cosmopolitan	PI664365	Mieze_Schindler	Fragaria x ananassa	Giant_Component	Locally_Central	2	9	11	85	NA	0.000432035	0.00121254
Cosmopolitan	56C124P012	Sequoia	Fragaria x ananassa	Giant_Component	Globally_Central	2	12	14	18869.7	NA	0.00400781	0.00120625
Cosmopolitan	Latest_Of_All	Latest_Of_All	Fragaria x ananassa	Giant_Component	Locally_Central	2	9	11	29	NA	0.000468593	0.00119199
Cosmopolitan	Williams	Williams	Fragaria x ananassa	Giant_Component	Locally_Central	2	12	14	157	NA	0.000463681	0.00119199
Cosmopolitan	Ettersburg_80	Ettersburg_80	Fragaria x ananassa	Giant_Component	Globally_Central	2	8	10	2623.62	NA	0.000757145	0.00118685
Cosmopolitan	Gem	Gem	Fragaria x ananassa	Giant_Component	Locally_Central	1	8	9	27	NA	0.000417341	0.00117144
Cosmopolitan	Tochinomine	Tochinomine	Fragaria x ananassa	Giant_Component	Globally_Central	2	6	8	2676.91	NA	0.000922151	0.00116117
Cosmopolitan	PI551482	Sunrise	Fragaria x ananassa	Giant_Component	Globally_Central	2	25	27	2081.33	NA	0.00078753	0.00116096
Cosmopolitan	PI551928	MDUS_3184	Fragaria x ananassa	Giant_Component	Globally_Central	2	13	15	3816.93	NA	0.000899297	0.00114318
Cosmopolitan	Rosa_Linda	Rosa_Linda	Fragaria x ananassa	Giant_Component	Globally_Central	2	8	10	2004.86	NA	0.000615306	0.00113256
Cosmopolitan	Red_Rich	Red_Rich	Fragaria x ananassa	Giant_Component	Globally_Central	2	10	12	957.536	NA	0.000576737	0.00112777
Cosmopolitan	82C014P603	Irvine	Fragaria x ananassa	Giant_Component	Globally_Central	2	11	13	4555.6	NA	0.000743804	0.0010928
Cosmopolitan	Early_Cambridge	Early_Cambridge	Fragaria x ananassa	Giant_Component	Globally_Central	2	8	10	470.067	NA	0.000444731	0.0010841
Cosmopolitan	PI551930	MDUS_3816	Fragaria x ananassa	Giant_Component	Globally_Central	2	8	10	1113.9	NA	0.000525341	0.00108121
Cosmopolitan	PI551633	Senga_Pantagruella	Fragaria x ananassa	Giant_Component	Locally_Central	2	4	6	76	NA	0.000382448	0.0010735
Cosmopolitan	Burr's_Seedling	Burr's_Seedling	Fragaria x ananassa	Giant_Component	Locally_Central	0	8	8	0	0.00416322	0.000380732	0.00106868
Cosmopolitan	Dorit	Dorit	Fragaria x ananassa	Giant_Component	Globally_Central	2	11	13	1877.88	NA	0.000582375	0.00103786
Cosmopolitan	36C039P004	Donner	Fragaria x ananassa	Giant_Component	Globally_Central	2	21	23	8198.1	NA	0.00220616	0.00103681
Cosmopolitan	PI551558	Temple	Fragaria x ananassa	Giant_Component	Globally_Central	2	13	15	1491	NA	0.000941292	0.00103625
Cosmopolitan	Glen_Mary	Glen_Mary	Fragaria x ananassa	Giant_Component	Locally_Central	0	12	12	0	0.00397398	0.000366088	0.00102758
Cosmopolitan	Spate_von_Leopoldshall	Spate_von_Leopoldshall	Fragaria x ananassa	Giant_Component	Locally_Central	2	7	9	102	NA	0.000362427	0.0010173
Cosmopolitan	Key_Largo	Key_Largo	Fragaria x ananassa	Giant_Component	Locally_Central	2	7	9	176	NA	0.000361512	0.00101474
Cosmopolitan	PI551406	Allstar	Fragaria x ananassa	Giant_Component	Globally_Central	2	22	24	1858.62	NA	0.000530226	0.00101325
Cosmopolitan	PI552260	Addie	Fragaria x ananassa	Giant_Component	Globally_Central	2	10	12	730.42	NA	0.000386528	0.00099611
Cosmopolitan	Charles_Downing	Charles_Downing	Fragaria x ananassa	Giant_Component	Globally_Central	2	9	11	8841	NA	0.00294633	0.000986477
Cosmopolitan	Maehyang	Maehyang	Fragaria x ananassa	Giant_Component	Globally_Central	2	11	13	896.686	NA	0.000633315	0.000986477
Cosmopolitan	Waterloo	Waterloo	Fragaria x ananassa	Giant_Component	Locally_Central	0	10	10	0	0.000756949	0.000351445	0.000986477
Cosmopolitan	PI551580	Glooscap	Fragaria x ananassa	Giant_Component	Globally_Central	2	3	5	1952.58	NA	0.000470765	0.000971063
Cosmopolitan	Ada_Herzberg	Ada_Herzberg	Fragaria x ananassa	Giant_Component	Globally_Central	2	6	8	498.752	NA	0.000369057	0.000968494
Cosmopolitan	Ettersburg_84	Ettersburg_84	Fragaria x ananassa	Giant_Component	Locally_Central	2	6	8	289.833	NA	0.00044045	0.000962072
Cosmopolitan	PI616586	Frel	Fragaria x comarum	Giant_Component	Locally_Central	2	11	13	34	NA	0.000336801	0.000945373
Cosmopolitan	Tudla	Tudla	Fragaria x ananassa	Giant_Component	Globally_Central	2	8	10	1122.26	NA	0.000494866	0.000945373
Cosmopolitan	Ionia	Ionia	Fragaria x ananassa	Giant_Component	Locally_Central	1	8	9	142	NA	0.000353247	0.000924822
Cosmopolitan	PS-1269	PS-1269	Fragaria x ananassa	Giant_Component	Locally_Central	0	11	11	0	0.00312242	0.00032948	0.000924822
Cosmopolitan	Benihoppe	Benihoppe	Fragaria x ananassa	Giant_Component	Globally_Central	2	10	12	850.393	NA	0.000423976	0.00090427
Cosmopolitan	PI551620	Vicomtesse_Hericart_de_Thury	Fragaria x ananassa	Giant_Component	Globally_Central	2	6	8	2244.08	NA	0.0024227	0.000895279
Cosmopolitan	Lady_Thompson	Thompson	Fragaria x ananassa	Giant_Component	Locally_Central	0	9	9	0	0.0287805	0.00228566	0.000863167
Cosmopolitan	La_Constante	La_Constante	Fragaria x ananassa	Giant_Component	Locally_Central	2	5	7	24	NA	0.000306599	0.000860598
Cosmopolitan	Bedford_Champion	Bedford_Champion	Fragaria x ananassa	Giant_Component	Locally_Central	2	7	9	210.5	NA	0.000330152	0.000858029
Cosmopolitan	Amerikanischer_Samling_II	Amerikanischer_Samling_II	Fragaria x ananassa	Giant_Component	Locally_Central	0	2	2	0	0.00389267	0.000359796	0.000842615
Cosmopolitan	PI617008	Tochiotome	Fragaria x ananassa	Giant_Component	Globally_Central	2	14	16	1994.05	NA	0.000470172	0.000842615
Cosmopolitan	Oberschlesien	Oberschlesien	Fragaria x ananassa	Giant_Component	Locally_Central	2	6	8	143.5	NA	0.000308256	0.000836193
Cosmopolitan	PI551595	Raritan	Fragaria x ananassa	Giant_Component	Globally_Central	2	9	11	5380.78	NA	0.00301413	0.000827202
Cosmopolitan	Pocomoke	Pocomoke	Fragaria x ananassa	Giant_Component	Locally_Central	0	8	8	0	0.00774432	0.000687131	0.000827202
Cosmopolitan	PI616560	Cavendish	Fragaria x ananassa	Giant_Component	Globally_Central	2	10	12	1720.89	NA	0.000412501	0.000825596
Cosmopolitan	Captain_Jack	Captain_Jack	Fragaria x ananassa	Giant_Component	Globally_Central	1	7	8	371.5	NA	0.000793765	0.000822064
Cosmopolitan	Cassandra_1906	Cassandra_1906	Fragaria x ananassa	Giant_Component	Locally_Central	1	4	5	87	NA	0.000304787	0.000783851
Cosmopolitan	ORUS_2012	ORUS_2012	Fragaria x ananassa	Giant_Component	Globally_Central	2	7	9	5211.59	NA	0.000496278	0.000782948
Cosmopolitan	Rapella	Rapella	Fragaria x ananassa	Giant_Component	Globally_Central	2	7	9	1449.94	NA	0.00036962	0.000781041
Cosmopolitan	Mara_des_Bois	Mara_des_Bois	Fragaria x ananassa	Giant_Component	Globally_Central	2	8	10	881.976	NA	0.000306487	0.000780961
Cosmopolitan	PI551407	Guardian	Fragaria x ananassa	Giant_Component	Globally_Central	2	9	11	919.324	NA	0.000453439	0.000780961
Cosmopolitan	Merton_Dawn	Merton_Dawn	Fragaria x ananassa	Giant_Component	Globally_Central	2	5	7	940.281	NA	0.000302632	0.000775823
Cosmopolitan	PI551540	Cardinal	Fragaria x ananassa	Giant_Component	Globally_Central	2	11	13	3839.3	NA	0.000478532	0.000775823
Cosmopolitan	PI551395	Catskill	Fragaria x ananassa	Giant_Component	Globally_Central	2	11	13	781.262	NA	0.000400877	0.000768116
Cosmopolitan	Beder_Wood	Beder_Wood	Fragaria x ananassa	Giant_Component	Locally_Central	0	6	6	0	0.00274394	0.000270905	0.000760409
Cosmopolitan	Darselect	Darselect	Fragaria x ananassa	Giant_Component	Globally_Central	2	9	11	1257.96	NA	0.00032755	0.000760409
Cosmopolitan	Endurance	Endurance	Fragaria x ananassa	Giant_Component	Locally_Central	2	10	12	46	NA	0.000270905	0.000760409
Cosmopolitan	Michel	Michel	Fragaria x ananassa	Giant_Component	Locally_Central	1	11	12	120	NA	0.000289267	0.000760409
Cosmopolitan	PI551477	Pocahontas	Fragaria x ananassa	Giant_Component	Globally_Central	2	12	14	2536.62	NA	0.0014903	0.000760409
Cosmopolitan	PI551539	Ogallala	Fragaria x ananassa	Giant_Component	Globally_Central	2	9	11	510.5	NA	0.000329561	0.000760409
Cosmopolitan	65C065P601	65C065P601	Fragaria x ananassa	Giant_Component	Globally_Central	2	6	8	6749.28	NA	0.00151589	0.000742573
Cosmopolitan	PI664331	Evita	Fragaria x ananassa	Giant_Component	Globally_Central	2	6	8	956.167	NA	0.00038044	0.000739857
Cosmopolitan	Surpriz_Olympiade	Surpriz_Olympiade	Fragaria x ananassa	Giant_Component	Locally_Central	2	7	9	238.333	NA	0.000281063	0.000739857
Cosmopolitan	La_Perle_Rose	La_Perle_Rose	Fragaria x ananassa	Giant_Component	Locally_Central	2	4	6	61	NA	0.000290125	0.00073472
Cosmopolitan	Dorsett	Dorsett	Fragaria x ananassa	Giant_Component	Globally_Central	2	21	23	4348.24	NA	0.00108135	0.000731268
Cosmopolitan	Surprise_des_Halles	Surprise_des_Halles	Fragaria x ananassa	Giant_Component	Globally_Central	2	10	12	451.619	NA	0.000268943	0.000729582
Cosmopolitan	PI551756	Dana	Fragaria x ananassa	Giant_Component	Globally_Central	2	5	7	718.99	NA	0.000343929	0.000722517
Cosmopolitan	PI617013	Regina	Fragaria x ananassa	Giant_Component	Globally_Central	2	8	10	701.478	NA	0.000428179	0.000719306
Cosmopolitan	Saint_Joseph	Saint_Joseph	Fragaria x ananassa	Giant_Component	Locally_Central	1	6	7	12	NA	0.000256262	0.000719306
Cosmopolitan	Dresden_1939	Dresden_1939	Fragaria x ananassa	Giant_Component	Locally_Central	2	5	7	310.633	NA	0.000321597	0.00070903
Cosmopolitan	Fendall	Fendall	Fragaria x ananassa	Giant_Component	Globally_Central	1	5	6	461.436	NA	0.000609803	0.000705297
Cosmopolitan	PI551907	Trebla	Fragaria x ananassa	Giant_Component	Locally_Central	2	5	7	147.333	NA	0.00031987	0.000701323
Cosmopolitan	Old_Black	Old_Black	Fragaria x ananassa	Halo	Locally_Central	0	6	6	0	0.00132466	0.00024894	0.000698754
Cosmopolitan	Redlands_Joy	Redlands_Joy	Fragaria x ananassa	Giant_Component	Globally_Central	2	5	7	497.11	NA	0.000320663	0.000698754
Cosmopolitan	Cambridge_Vigour	Cambridge_Vigour	Fragaria x ananassa	Giant_Component	Globally_Central	2	8	10	524.767	NA	0.000298181	0.000688478
Cosmopolitan	PI551561	Sivetta	Fragaria x ananassa	Giant_Component	Globally_Central	2	17	19	1624.02	NA	0.000361595	0.000678203
Cosmopolitan	Souvenir_de_Charles_Machiroux	Souvenir_de_Charles_Machiroux	Fragaria x ananassa	Giant_Component	Locally_Central	2	4	6	128	NA	0.000241618	0.000678203
Cosmopolitan	PI551596	Redcoat	Fragaria x ananassa	Giant_Component	Globally_Central	2	10	12	2492.94	NA	0.00144183	0.000675634
Cosmopolitan	Progressive	Progressive	Fragaria x ananassa	Giant_Component	Globally_Central	2	14	16	4301.33	NA	0.00111769	0.000667947
Cosmopolitan	Etna	Etna	Fragaria x ananassa	Giant_Component	Globally_Central	2	7	9	1163.25	NA	0.000357876	0.000667927
Cosmopolitan	Frith	Frith	Fragaria x ananassa	Giant_Component	Globally_Central	1	8	9	759.833	NA	0.00206492	0.000667686
Cosmopolitan	Redheart	Redheart	Fragaria x ananassa	Giant_Component	Globally_Central	2	17	19	17546.6	NA	0.00230446	0.000664314
Cosmopolitan	Redlands_Kabarla	Redlands_Kabarla	Fragaria x ananassa	Giant_Component	Locally_Central	2	5	7	191.408	NA	0.000285472	0.000647375
Cosmopolitan	Fairmore	Fairmore	Fragaria x ananassa	Giant_Component	Locally_Central	2	9	11	268.914	NA	0.000564462	0.000637572
Cosmopolitan	ISF_80-52-1	ISF_80-52-1	Fragaria x ananassa	Giant_Component	Globally_Central	2	5	7	1355.51	NA	0.000388335	0.000637099
Cosmopolitan	Macherauch's_Fruhernte	Macherauch's_Fruhernte	Fragaria x ananassa	Giant_Component	Locally_Central	2	6	8	120.867	NA	0.000237004	0.000637099
Cosmopolitan	PI551417	Cavalier	Fragaria x ananassa	Giant_Component	Globally_Central	2	4	6	356.167	NA	0.000267671	0.000637099
Cosmopolitan	Vicoda	Vicoda	Fragaria x ananassa	Giant_Component	Locally_Central	0	7	7	0	0.00179775	0.000226975	0.000637099
Cosmopolitan	Barton	Barton	Fragaria x ananassa	Giant_Component	Locally_Central	2	6	8	66	NA	0.000219653	0.000616548
Cosmopolitan	Belmont	Belmont	Fragaria x ananassa	Giant_Component	Locally_Central	0	6	6	0	0.0245712	0.00195994	0.000616548
Cosmopolitan	Culver	Culver	Fragaria x ananassa	Giant_Component	Globally_Central	2	5	7	604	NA	0.000498042	0.000616548
Cosmopolitan	Cyclone_1889	Cyclone_1889	Fragaria x ananassa	Giant_Component	Globally_Central	2	3	5	10227.3	NA	0.00709263	0.000616548
Cosmopolitan	Festivalnaja_Romashka	Festivalnaja_Romashka	Fragaria x ananassa	Giant_Component	Locally_Central	2	5	7	120	NA	0.000226721	0.000616548
Cosmopolitan	Honor	Honor	Fragaria x ananassa	Giant_Component	Globally_Central	2	5	7	1237	NA	0.000228479	0.000616548
Cosmopolitan	Krasavitsa_Zagoria	Krasavitsa_Zagoria	Fragaria x ananassa	Giant_Component	Locally_Central	0	3	3	0	0.00208161	0.000219653	0.000616548
Cosmopolitan	PI551927	Jewel	Fragaria x ananassa	Giant_Component	Globally_Central	2	5	7	1066.15	NA	0.00031955	0.000616548
Cosmopolitan	Polka	Polka	Fragaria x ananassa	Giant_Component	Globally_Central	2	10	12	1094.44	NA	0.000280824	0.000616548
Cosmopolitan	Real	Real	Fragaria x ananassa	Giant_Component	Globally_Central	2	5	7	387.667	NA	0.00026183	0.000616548
Cosmopolitan	Schild's_No.19	Schild's_No.19	Fragaria x ananassa	Giant_Component	Locally_Central	2	4	6	60	NA	0.00030178	0.000616548
Cosmopolitan	Senga_Tigaiga	Senga_Tigaiga	Fragaria x ananassa	Giant_Component	Locally_Central	2	5	7	180.5	NA	0.000229236	0.000616548
Cosmopolitan	PI551500	Linn	Fragaria x ananassa	Giant_Component	Globally_Central	2	19	21	3078.7	NA	0.000342199	0.00061009
Cosmopolitan	72C008P105	Fern	Fragaria x ananassa	Giant_Component	Globally_Central	2	6	8	1563.75	NA	0.000351669	0.000606272
Cosmopolitan	B6.117	B6.117	Fragaria x ananassa	Giant_Component	Locally_Central	0	4	4	0	0.00337079	0.000260838	0.000606272
Cosmopolitan	D5.23	D5.23	Fragaria x ananassa	Giant_Component	Locally_Central	0	5	5	0	0.00337079	0.000260838	0.000606272
Cosmopolitan	Black_Prince	Black_Prince	Fragaria x ananassa	Giant_Component	Globally_Central	1	4	5	2067.74	NA	0.00194999	0.000595996
Cosmopolitan	Magoon	Magoon	Fragaria x ananassa	Giant_Component	Locally_Central	0	5	5	0	0.00160852	0.000212331	0.000595996
Cosmopolitan	PI551416	Scott	Fragaria x ananassa	Giant_Component	Globally_Central	2	9	11	752.106	NA	0.000266276	0.000595996
Cosmopolitan	PI616621	Haruyoi	Fragaria x ananassa	Giant_Component	Globally_Central	2	5	7	401.283	NA	0.000298779	0.000595996
Cosmopolitan	Red_Sugar	Red_Sugar	Fragaria x ananassa	Giant_Component	Locally_Central	1	7	8	226.5	NA	0.000230779	0.000595996
Cosmopolitan	PI551438	Suwanee	Fragaria x ananassa	Giant_Component	Globally_Central	2	7	9	3753.89	NA	0.00256417	0.000593736
Cosmopolitan	Fairpeake	Fairpeake	Fragaria x ananassa	Giant_Component	Locally_Central	2	4	6	209.58	NA	0.00133865	0.00059118
Cosmopolitan	Guardsman	Guardsman	Fragaria x ananassa	Giant_Component	Globally_Central	2	7	9	692.248	NA	0.000499671	0.000581867
Cosmopolitan	Eva_Macherauch	Eva_Macherauch	Fragaria x ananassa	Giant_Component	Globally_Central	2	7	9	383	NA	0.00025747	0.000580583
Cosmopolitan	PI664321	Puget_Reliance	Fragaria x ananassa	Giant_Component	Globally_Central	2	14	16	3285.35	NA	0.000286229	0.000578415
Cosmopolitan	PI551760	Columbia	Fragaria x ananassa	Giant_Component	Locally_Central	2	5	7	154	NA	0.000205467	0.000576729
Cosmopolitan	Agriculturist	Agriculturist	Fragaria x ananassa	Giant_Component	Locally_Central	2	5	7	46	NA	0.000221026	0.000575445
Cosmopolitan	Champion	Champion	Fragaria x ananassa	Giant_Component	Locally_Central	0	3	3	0	0.00189237	0.000205009	0.000575445
Cosmopolitan	Clyde	Clyde	Fragaria x ananassa	Giant_Component	Globally_Central	1	7	8	12803.3	NA	0.00604887	0.000575445
Cosmopolitan	Elan	Elan	Fragaria x ananassa	Giant_Component	Globally_Central	2	4	6	696.621	NA	0.000263669	0.000575445
Cosmopolitan	Marvel_1915	Marvel_1915	Fragaria x ananassa	Giant_Component	Locally_Central	2	4	6	130	NA	0.000281245	0.000575445
Cosmopolitan	Maximus	Maximus	Fragaria x ananassa	Giant_Component	Locally_Central	0	5	5	0	0.00189237	0.000205009	0.000575445
Cosmopolitan	Napier	Napier	Fragaria x ananassa	Giant_Component	Locally_Central	0	4	4	0	0.0015139	0.000205009	0.000575445
Cosmopolitan	PI270471	Kaiser_Samling	Fragaria x ananassa	Giant_Component	Globally_Central	2	2	4	630	NA	0.000822212	0.000575445
Cosmopolitan	Purpurovaya	Purpurovaya	Fragaria x ananassa	Giant_Component	Locally_Central	2	5	7	120.333	NA	0.000227077	0.000575445
Cosmopolitan	Swainstone	Swainstone	Fragaria x ananassa	Giant_Component	Locally_Central	0	4	4	0	0.0040686	0.000431984	0.000575445
Cosmopolitan	91.143.5	91.143.5	Fragaria x ananassa	Giant_Component	Globally_Central	2	5	7	1026.49	NA	0.000220825	0.000572876
Cosmopolitan	PI551599	Tago	Fragaria x ananassa	Giant_Component	Globally_Central	2	3	5	772.264	NA	0.000284544	0.000560031
Cosmopolitan	Joliette	Joliette	Fragaria x ananassa	Giant_Component	Globally_Central	2	6	8	956.7	NA	0.000279475	0.000554893
Cosmopolitan	Shizutakara	Shizutakara	Fragaria x ananassa	Giant_Component	Locally_Central	2	5	7	211.267	NA	0.000339617	0.000554893
Cosmopolitan	Glima	Glima	Fragaria x ananassa	Giant_Component	Locally_Central	2	4	6	239.733	NA	0.000248824	0.000553609
Cosmopolitan	MDUS_3082	MDUS_3082	Fragaria x ananassa	Giant_Component	Globally_Central	2	6	8	1519.95	NA	0.00053504	0.000549755
Cosmopolitan	83C049P001	Seascape	Fragaria x ananassa	Giant_Component	Globally_Central	2	25	27	4438.46	NA	0.000394473	0.000544617
Cosmopolitan	PI616777	Sitka	Fragaria x ananassa	Giant_Component	Locally_Central	2	7	9	22	NA	0.000194027	0.000544617
Cosmopolitan	Cumberland	Cumberland	Fragaria x ananassa	Giant_Component	Globally_Central	1	4	5	3819.88	NA	0.00127584	0.000534342
Cosmopolitan	Frogmore_Late_Pine	Frogmore_Late_Pine	Fragaria x ananassa	Giant_Component	Locally_Central	2	4	6	8.5	NA	0.000212331	0.000534342
Cosmopolitan	Hansa	Hansa	Fragaria x ananassa	Giant_Component	Globally_Central	1	5	6	381.5	NA	0.000581832	0.000534342
Cosmopolitan	New_Jersey_Scarlet	New_Jersey_Scarlet	Fragaria virginiana	Giant_Component	Marginal	0	1	1	0	0.0826768	0.00639768	0
Cosmopolitan	Kinuama	Kinuama	Fragaria x ananassa	Giant_Component	Locally_Central	0	5	5	0	0.00246009	0.000190366	0.000534342
Cosmopolitan	Mastodon	Mastodon	Fragaria x ananassa	Giant_Component	Locally_Central	2	5	7	116	NA	0.000195751	0.000534342
Cosmopolitan	Miss	Miss	Fragaria x ananassa	Giant_Component	Globally_Central	2	5	7	594.402	NA	0.000246112	0.000534342
Cosmopolitan	Pathfinder	Pathfinder	Fragaria x ananassa	Giant_Component	Globally_Central	2	6	8	326.753	NA	0.00243675	0.000534342
Cosmopolitan	PI551411	Tamella	Fragaria x ananassa	Giant_Component	Globally_Central	2	5	7	2037.36	NA	0.000820274	0.000534342
Cosmopolitan	PI551589	Kent	Fragaria x ananassa	Giant_Component	Globally_Central	2	9	11	1315.72	NA	0.000256903	0.000534342
Cosmopolitan	Planasa_86-032	Planasa_86-032	Fragaria x ananassa	Halo	Locally_Central	0	6	6	0	0.00132466	0.000190366	0.000534342
Cosmopolitan	Rosie_1991	Rosie_1991	Fragaria x ananassa	Giant_Component	Globally_Central	2	6	8	660.48	NA	0.000266614	0.000534342
Cosmopolitan	Sir_J._Paxton	Sir_J._Paxton	Fragaria x ananassa	Giant_Component	Locally_Central	0	5	5	0	0.00191603	0.000265414	0.000534342
Cosmopolitan	Sparta_1936	Sparta_1936	Fragaria x ananassa	Giant_Component	Locally_Central	2	4	6	202.294	NA	0.000194664	0.000534342
Cosmopolitan	Cal_177.21	Cal_177.21	Fragaria x ananassa	Giant_Component	Globally_Central	2	8	10	10669.2	NA	0.00497311	0.000528832
Cosmopolitan	PI551398	Titan	Fragaria x ananassa	Giant_Component	Globally_Central	2	8	10	1170.58	NA	0.000303789	0.000524066
Cosmopolitan	PI551638	Veestar	Fragaria x ananassa	Giant_Component	Globally_Central	2	4	6	577.925	NA	0.000287591	0.000518928
Cosmopolitan	Manchester	Manchester	Fragaria x ananassa	Giant_Component	Locally_Central	0	4	4	0	0.00160852	0.000183044	0.00051379
Cosmopolitan	PI551569	Empire	Fragaria x ananassa	Giant_Component	Locally_Central	2	4	6	258.717	NA	0.000227294	0.00051379
Cosmopolitan	MDUS_2650	MDUS_2650	Fragaria x ananassa	Giant_Component	Globally_Central	2	5	7	611.702	NA	0.000536482	0.000504799
Cosmopolitan	Belle_Rouge	Belle_Rouge	Fragaria x ananassa	Giant_Component	Globally_Central	2	6	8	698.08	NA	0.000183237	0.000493238
Cosmopolitan	Burr's_New_Pine	Burr's_New_Pine	Fragaria x ananassa	Giant_Component	Locally_Central	2	4	6	28	NA	0.000175722	0.000493238
Cosmopolitan	Cooper	Cooper	Fragaria x ananassa	Giant_Component	Locally_Central	1	5	6	37.5	NA	0.00048719	0.000493238
Cosmopolitan	Countess	Countess	Fragaria x ananassa	Giant_Component	Locally_Central	0	4	4	0	0.00227085	0.000175722	0.000493238
Cosmopolitan	Dr._Hogg	Dr._Hogg	Fragaria x ananassa	Giant_Component	Locally_Central	0	3	3	0	0.00199882	0.000213246	0.000493238
Cosmopolitan	Fillbasket	Fillbasket	Fragaria x ananassa	Giant_Component	Locally_Central	2	4	6	52	NA	0.000197917	0.000493238
Cosmopolitan	Glendale	Glendale	Fragaria x ananassa	Giant_Component	Locally_Central	0	6	6	0	0.0136233	0.00111277	0.000493238
Cosmopolitan	L'Acadie	L'Acadie	Fragaria x ananassa	Giant_Component	Globally_Central	2	4	6	548.167	NA	0.000219089	0.000493238
Cosmopolitan	Marathon	Marathon	Fragaria x ananassa	Giant_Component	Locally_Central	2	4	6	50	NA	0.000175722	0.000493238
Cosmopolitan	Markee	Markee	Fragaria x ananassa	Giant_Component	Locally_Central	0	8	8	0	0.0155559	0.00126232	0.000493238
Cosmopolitan	Monarch	Monarch	Fragaria x ananassa	Giant_Component	Locally_Central	1	4	5	36	NA	0.000175722	0.000493238
Cosmopolitan	Neunan	Neunan	Fragaria x ananassa	Giant_Component	Globally_Central	1	5	6	3577.96	NA	0.00353659	0.000493238
Cosmopolitan	Nicaise	Nicaise	Fragaria x ananassa	Giant_Component	Locally_Central	0	4	4	0	0.0015139	0.000175722	0.000493238
Cosmopolitan	PI551436	Direktor_Paul_Wallbaum	Fragaria x ananassa	Giant_Component	Locally_Central	2	4	6	129	NA	0.000175877	0.000493238
Cosmopolitan	PI551605	Grenadier	Fragaria x ananassa	Giant_Component	Locally_Central	2	5	7	162	NA	0.000221049	0.000493238
Cosmopolitan	PI551830	Lateglow	Fragaria x ananassa	Giant_Component	Globally_Central	2	6	8	851.929	NA	0.000285998	0.000493238
Cosmopolitan	Rachel	Rachel	Fragaria x ananassa	Giant_Component	Locally_Central	2	4	6	210.014	NA	0.00020074	0.000493238
Cosmopolitan	Red_Pearl	Red_Pearl	Fragaria x ananassa	Giant_Component	Globally_Central	2	3	5	396.995	NA	0.000283922	0.000493238
Cosmopolitan	Siris	Siris	Fragaria x ananassa	Giant_Component	Locally_Central	0	3	3	0	0.0015139	0.000175722	0.000493238
Cosmopolitan	Suncoast_Delight	Suncoast_Delight	Fragaria x ananassa	Giant_Component	Globally_Central	2	5	7	905.09	NA	0.000190918	0.000493238
Cosmopolitan	Windsor	Windsor	Fragaria x ananassa	Giant_Component	Locally_Central	2	2	4	24	NA	0.000190366	0.000493238
Cosmopolitan	PI551401	Redstar	Fragaria x ananassa	Giant_Component	Globally_Central	2	7	9	428.153	NA	0.000433366	0.000490669
Cosmopolitan	Nora	Nora	Fragaria x ananassa	Giant_Component	Globally_Central	2	4	6	661.322	NA	0.000244057	0.0004881
Cosmopolitan	56S115P011	Aliso	Fragaria x ananassa	Giant_Component	Globally_Central	2	6	8	680.419	NA	0.000222197	0.00048806
Cosmopolitan	Pandora	Pandora	Fragaria x ananassa	Giant_Component	Globally_Central	2	14	16	1243.06	NA	0.000190356	0.000482963
Cosmopolitan	Easypicker	Easypicker	Fragaria x ananassa	Giant_Component	Locally_Central	2	2	4	21.6	NA	0.000340751	0.000472687
Cosmopolitan	PI551871	Streamliner	Fragaria x ananassa	Giant_Component	Locally_Central	0	5	5	0	0.00150799	0.000175265	0.000472687
Cosmopolitan	PI551608	Siletz	Fragaria x ananassa	Giant_Component	Globally_Central	2	4	6	1456.44	NA	0.000254409	0.000470921
Cosmopolitan	Earlibrite	Earlibrite	Fragaria x ananassa	Giant_Component	Globally_Central	2	2	4	3190.62	NA	0.000242341	0.000465217
Cosmopolitan	PI551437	Auchincruive_Climax	Fragaria x ananassa	Giant_Component	Globally_Central	2	6	8	1967.87	NA	0.00178704	0.000457273
Cosmopolitan	Lindalicious	Lindalicious	Fragaria x ananassa	Giant_Component	Locally_Central	1	3	4	43.1667	NA	0.000192522	0.000454704
Cosmopolitan	33x257	33x257	Fragaria x ananassa	Giant_Component	Locally_Central	0	3	3	0	0.00208161	0.000161079	0.000452135
Cosmopolitan	Burgundy	Burgundy	Fragaria x ananassa	Giant_Component	Locally_Central	2	3	5	35.2	NA	0.000279286	0.000452135
Cosmopolitan	Dybdahl	Dybdahl	Fragaria x ananassa	Giant_Component	Locally_Central	0	3	3	0	0.00132466	0.000161079	0.000452135
Cosmopolitan	Foreman_Excelsior	Foreman_Excelsior	Fragaria x ananassa	Giant_Component	Globally_Central	1	3	4	1916	NA	0.00177257	0.000452135
Cosmopolitan	Hapil	Hapil	Fragaria x ananassa	Giant_Component	Globally_Central	2	6	8	431.024	NA	0.000180006	0.000452135
Cosmopolitan	Lido	Lido	Fragaria x ananassa	Giant_Component	Locally_Central	0	2	2	0	0.00132466	0.000161079	0.000452135
Cosmopolitan	Muncher_Kindl	Muncher_Kindl	Fragaria x ananassa	Giant_Component	Locally_Central	2	2	4	137.25	NA	0.000182036	0.000452135
Cosmopolitan	Muscade	Muscade	Fragaria x ananassa	Giant_Component	Locally_Central	2	3	5	104	NA	0.000161079	0.000452135
Cosmopolitan	PI551567	Hummi_Grandee	Fragaria x ananassa	Giant_Component	Locally_Central	0	2	2	0	0.00132466	0.000161079	0.000452135
Cosmopolitan	PI617020	Kama	Fragaria x ananassa	Giant_Component	Locally_Central	2	2	4	255.667	NA	0.000175758	0.000452135
Cosmopolitan	Prince_of_Berries	Prince_of_Berries	Fragaria x ananassa	Giant_Component	Locally_Central	1	2	3	0	NA	0.000212331	0.000452135
Cosmopolitan	Summer_Berry	Summer_Berry	Fragaria x ananassa	Giant_Component	Locally_Central	2	5	7	267.452	NA	0.000171655	0.000452135
Cosmopolitan	Vilanova	Vilanova	Fragaria x ananassa	Giant_Component	Globally_Central	2	5	7	824.056	NA	0.000257787	0.000452135
Cosmopolitan	Vola	Vola	Fragaria x ananassa	Giant_Component	Locally_Central	2	4	6	83.7167	NA	0.00017666	0.000452135
Cosmopolitan	Willard	Willard	Fragaria x ananassa	Giant_Component	Locally_Central	0	4	4	0	0.000189237	0.000161079	0.000452135
Cosmopolitan	Wunder_von_Kothen	Wunder_von_Kothen	Fragaria x ananassa	Giant_Component	Locally_Central	0	3	3	0	0.00186872	0.000269075	0.000452135
Cosmopolitan	PI551960	Clark	Fragaria x ananassa	Giant_Component	Globally_Central	1	9	10	368.243	NA	0.000280447	0.000432145
Cosmopolitan	Sieger	Sieger	Fragaria x ananassa	Giant_Component	Globally_Central	2	4	6	2836	NA	0.00161919	0.000431584
Cosmopolitan	Abington	Abington	Fragaria x ananassa	Giant_Component	Locally_Central	0	3	3	0	0.00113542	0.000146435	0.000411032
Cosmopolitan	Atlantic	Atlantic	Fragaria x ananassa	Giant_Component	Locally_Central	0	3	3	0	0.00113542	0.000146435	0.000411032
Cosmopolitan	Black_Beauty	Black_Beauty	Fragaria x ananassa	Giant_Component	Locally_Central	2	3	5	21	NA	0.000183838	0.000411032
Cosmopolitan	Captain	Captain	Fragaria x ananassa	Giant_Component	Locally_Central	2	2	4	12	NA	0.000146435	0.000411032
Cosmopolitan	Climax	Climax	Fragaria x ananassa	Giant_Component	Locally_Central	2	3	5	19.2	NA	0.000164082	0.000411032
Cosmopolitan	Hudson_Bay	Hudson_Bay	Fragaria virginiana	Giant_Component	Locally_Central	0	7	7	0	0.0346168	0.00267871	0.000534342
Cosmopolitan	Elgin	Elgin	Fragaria x ananassa	Giant_Component	Locally_Central	2	3	5	6	NA	0.000146435	0.000411032
Cosmopolitan	Florida_Radiance	Florida_Radiance	Fragaria x ananassa	Giant_Component	Globally_Central	2	2	4	772.036	NA	0.000226121	0.000411032
Cosmopolitan	Glenheart	Glenheart	Fragaria x ananassa	Giant_Component	Locally_Central	2	2	4	75.5	NA	0.000148085	0.000411032
Cosmopolitan	Granda	Granda	Fragaria x ananassa	Giant_Component	Locally_Central	2	3	5	268.667	NA	0.000166259	0.000411032
Cosmopolitan	Jewell	Jewell	Fragaria x ananassa	Giant_Component	Locally_Central	2	3	5	6	NA	0.000183044	0.000411032
Cosmopolitan	Johnson	Johnson	Fragaria x ananassa	Giant_Component	Locally_Central	2	3	5	28	NA	0.000167943	0.000411032
Cosmopolitan	Kitanokagayaki	Kitanokagayaki	Fragaria x ananassa	Giant_Component	Globally_Central	2	4	6	846.324	NA	0.000152364	0.000411032
Cosmopolitan	Lovett	Lovett	Fragaria x ananassa	Giant_Component	Locally_Central	2	3	5	30	NA	0.000169316	0.000411032
Cosmopolitan	Mary_1894	Mary_1894	Fragaria x ananassa	Giant_Component	Locally_Central	1	3	4	16	NA	0.000148266	0.000411032
Cosmopolitan	Nanaimo	Nanaimo	Fragaria x ananassa	Giant_Component	Globally_Central	2	5	7	664.024	NA	0.000194237	0.000411032
Cosmopolitan	Peabody's_Seedling	Peabody's_Seedling	Fragaria x ananassa	Giant_Component	Locally_Central	2	3	5	15	NA	0.000146435	0.000411032
Cosmopolitan	PI551441	Robinson	Fragaria x ananassa	Giant_Component	Locally_Central	2	3	5	59	NA	0.000169262	0.000411032
Cosmopolitan	PI551545	Ozark_Beauty	Fragaria x ananassa	Giant_Component	Locally_Central	2	3	5	72	NA	0.000172867	0.000411032
Cosmopolitan	PI616859	Pavlovtchanka	Fragaria x ananassa	Giant_Component	Locally_Central	0	2	2	0	0.00113542	0.000146435	0.000411032
Cosmopolitan	PI641185	Oishishikinari_2	Fragaria x ananassa	Giant_Component	Locally_Central	2	3	5	197.25	NA	0.000148946	0.000411032
Cosmopolitan	PI664337	Strawberry_Festival	Fragaria x ananassa	Giant_Component	Globally_Central	2	10	12	1831.35	NA	0.000223261	0.000411032
Cosmopolitan	Prince_Albert	Prince_Albert	Fragaria x ananassa	Giant_Component	Locally_Central	0	3	3	0	0.000756949	0.000146435	0.000411032
Cosmopolitan	Royal_Straight_Flush	Royal_Straight_Flush	Fragaria x ananassa	Giant_Component	Locally_Central	0	3	3	0	0.000378475	0.000146435	0.000411032
Cosmopolitan	San_Juan	San_Juan	Fragaria x ananassa	Giant_Component	Locally_Central	2	4	6	14	NA	0.000146435	0.000411032
Cosmopolitan	Simcoe	Simcoe	Fragaria x ananassa	Giant_Component	Locally_Central	2	4	6	130	NA	0.000166107	0.000411032
Cosmopolitan	Splendida	Splendida	Fragaria x ananassa	Giant_Component	Locally_Central	2	3	5	90	NA	0.000146435	0.000411032
Cosmopolitan	Syriusz	Syriusz	Fragaria x ananassa	Giant_Component	Locally_Central	2	3	5	234.5	NA	0.00015414	0.000411032
Cosmopolitan	Tennessee	Tennessee	Fragaria x ananassa	Giant_Component	Locally_Central	2	3	5	23	NA	0.000176866	0.000411032
Cosmopolitan	Uberreich	Uberreich	Fragaria x ananassa	Giant_Component	Locally_Central	0	3	3	0	0.0029864	0.000318954	0.000411032
Cosmopolitan	Virtue	Virtue	Fragaria x ananassa	Giant_Component	Globally_Central	2	5	7	755	NA	0.000155262	0.000411032
Cosmopolitan	Dixieland	Dixieland	Fragaria x ananassa	Giant_Component	Globally_Central	2	7	9	731.5	NA	0.00049351	0.000405573
Cosmopolitan	PI551503	Benton	Fragaria x ananassa	Giant_Component	Globally_Central	2	16	18	1835.19	NA	0.000247083	0.000403674
Cosmopolitan	PI551953	Tribute	Fragaria x ananassa	Giant_Component	Globally_Central	2	28	30	4035.77	NA	0.00021149	0.000400756
Cosmopolitan	Canall	Canall	Fragaria x ananassa	Giant_Component	Globally_Central	2	11	13	500	NA	0.000183902	0.000395618
Cosmopolitan	PI551538	Midway	Fragaria x ananassa	Giant_Component	Globally_Central	2	5	7	446.667	NA	0.000280839	0.000395618
Cosmopolitan	PI616623	Miyazaki	Fragaria x ananassa	Giant_Component	Locally_Central	0	4	4	0	0.00520883	0.000461643	0.000395618
Cosmopolitan	Osuzu	Osuzu	Fragaria x ananassa	Giant_Component	Locally_Central	2	2	4	92.65	NA	0.000241373	0.000393049
Cosmopolitan	America	America	Fragaria x ananassa	Giant_Component	Locally_Central	0	3	3	0	0.0025961	0.000200891	0.00039048
Cosmopolitan	Kentucky	Kentucky	Fragaria x ananassa	Giant_Component	Locally_Central	1	3	4	11	NA	0.000137054	0.000380205
Cosmopolitan	Akanekko	Akanekko	Fragaria x ananassa	Giant_Component	Locally_Central	2	4	6	214.456	NA	0.000216039	0.000375067
Cosmopolitan	Providence	Providence	Fragaria x ananassa	Giant_Component	Globally_Central	2	9	11	693.633	NA	0.000171883	0.000370571
Cosmopolitan	Fendalcino	Fendalcino	Fragaria x ananassa	Giant_Component	Globally_Central	2	4	6	3982.39	NA	0.000792193	0.000370531
Cosmopolitan	70C003P108	Brighton	Fragaria x ananassa	Giant_Component	Globally_Central	2	5	7	1121.33	NA	0.000460461	0.000369929
Cosmopolitan	Balboa	Balboa	Fragaria x ananassa	Giant_Component	Globally_Central	2	2	4	1238.33	NA	0.000136565	0.000369929
Cosmopolitan	Beaderarena	Beaderarena	Fragaria x ananassa	Giant_Component	Locally_Central	2	4	6	10	NA	0.000131792	0.000369929
Cosmopolitan	Boston_Pine	Boston_Pine	Fragaria x ananassa	Giant_Component	Locally_Central	2	2	4	12	NA	0.000131792	0.000369929
Cosmopolitan	Crown	Crown	Fragaria x ananassa	Giant_Component	Locally_Central	2	2	4	40	NA	0.000232466	0.000369929
Cosmopolitan	Darestival	Darestival	Fragaria x ananassa	Giant_Component	Locally_Central	2	2	4	136.469	NA	0.000149313	0.000369929
Cosmopolitan	Holstein	Holstein	Fragaria x ananassa	Giant_Component	Locally_Central	2	2	4	21	NA	0.000161536	0.000369929
Cosmopolitan	Joe_Reiter	Joe_Reiter	Fragaria x ananassa	Giant_Component	Locally_Central	2	3	5	58	NA	0.000221483	0.000369929
Cosmopolitan	King	King	Fragaria x ananassa	Giant_Component	Marginal	2	1	3	15.3333	NA	0.000135467	0.000369929
Cosmopolitan	King_of_the_Earlies	King_of_the_Earlies	Fragaria x ananassa	Giant_Component	Globally_Central	2	7	9	7909.32	NA	0.00319976	0.000369929
Cosmopolitan	Parsons	Parsons	Fragaria x ananassa	Giant_Component	Locally_Central	0	5	5	0	0.000946187	0.000131792	0.000369929
Cosmopolitan	PI551499	Northwest	Fragaria x ananassa	Giant_Component	Globally_Central	2	4	6	4417.96	NA	0.000509778	0.000369929
Cosmopolitan	PI551621	Tenira	Fragaria x ananassa	Giant_Component	Locally_Central	2	4	6	185.917	NA	0.000150587	0.000369929
Cosmopolitan	PI551801	Mimek	Fragaria x ananassa	Giant_Component	Locally_Central	2	2	4	189	NA	0.00013247	0.000369929
Cosmopolitan	PI551802	British_Sovereign	Fragaria x ananassa	Giant_Component	Locally_Central	1	3	4	4	NA	0.000131792	0.000369929
Cosmopolitan	PI617023	Lihama	Fragaria x ananassa	Giant_Component	Locally_Central	0	2	2	0	0.000946187	0.000131792	0.000369929
Cosmopolitan	Record_1931	Record_1931	Fragaria x ananassa	Giant_Component	Locally_Central	1	2	3	3	NA	0.000131792	0.000369929
Cosmopolitan	Starbright	Starbright	Fragaria x ananassa	Giant_Component	Locally_Central	2	2	4	29	NA	0.000148376	0.000369929
Cosmopolitan	PI551396	Floridabelle	Fragaria x ananassa	Giant_Component	Globally_Central	2	7	9	4375.31	NA	0.00099294	0.00036447
Cosmopolitan	Asuka_Wave	Asuka_Wave	Fragaria x ananassa	Giant_Component	Locally_Central	2	2	4	117.967	NA	0.000146397	0.000349377
Cosmopolitan	PI551915	Bogota	Fragaria x ananassa	Giant_Component	Globally_Central	2	9	11	496.011	NA	0.000149583	0.000349377
Cosmopolitan	PI616559	Seneca	Fragaria x ananassa	Giant_Component	Globally_Central	2	3	5	361.362	NA	0.000238381	0.000349377
Cosmopolitan	PI664316	Idea	Fragaria x ananassa	Giant_Component	Globally_Central	2	3	5	518.833	NA	0.000144554	0.000349377
Cosmopolitan	PI551762	Mollala	Fragaria x ananassa	Giant_Component	Globally_Central	2	2	4	1371.88	NA	0.000190783	0.000347541
Cosmopolitan	PI551614	Stelemaster	Fragaria x ananassa	Giant_Component	Globally_Central	2	5	7	1136.14	NA	0.000817376	0.000341991
Cosmopolitan	PI551400	Micmac	Fragaria x ananassa	Giant_Component	Globally_Central	2	6	8	1897.61	NA	0.000485156	0.00034167
Cosmopolitan	PI616924	Eros	Fragaria x ananassa	Giant_Component	Globally_Central	2	3	5	512.096	NA	0.000180357	0.000339101
Cosmopolitan	Tupper	Tupper	Fragaria x ananassa	Giant_Component	Locally_Central	2	4	6	30.6667	NA	0.000129965	0.000331394
Cosmopolitan	75C071P105	Muir	Fragaria x ananassa	Giant_Component	Globally_Central	2	7	9	2429.19	NA	0.000798651	0.000328826
Cosmopolitan	88E94	88E94	Fragaria x ananassa	Giant_Component	Locally_Central	0	4	4	0	0.0015139	0.000117148	0.000328826
Cosmopolitan	96C042P601	Ventana	Fragaria x ananassa	Giant_Component	Globally_Central	2	4	6	384.011	NA	0.000123612	0.000328826
Cosmopolitan	Ambrosia_Late	Ambrosia_Late	Fragaria x ananassa	Giant_Component	Marginal	0	1	1	0	0.000756949	0.000117148	0.000328826
Cosmopolitan	Anneliese	Anneliese	Fragaria x ananassa	Giant_Component	Locally_Central	2	2	4	83.3333	NA	0.00011998	0.000328826
Cosmopolitan	Asieta	Asieta	Fragaria x ananassa	Giant_Component	Locally_Central	2	2	4	48	NA	0.000125134	0.000328826
Cosmopolitan	Aurore	Aurore	Fragaria x ananassa	Halo	Locally_Central	0	2	2	0	0.000756949	0.000117148	0.000328826
Cosmopolitan	Bellmar	Bellmar	Fragaria x ananassa	Giant_Component	Locally_Central	2	3	5	94.5	NA	0.000129877	0.000328826
Cosmopolitan	Big_Bob_NA	Big_Bob_NA	Fragaria x ananassa	Giant_Component	Locally_Central	2	2	4	24	NA	0.000135453	0.000328826
Cosmopolitan	Calea	Calea	Fragaria x ananassa	Giant_Component	Locally_Central	2	2	4	161	NA	0.000131339	0.000328826
Cosmopolitan	Crusader	Crusader	Fragaria x ananassa	Giant_Component	Locally_Central	2	2	4	70.9333	NA	0.000141952	0.000328826
Cosmopolitan	Dollar	Dollar	Fragaria x ananassa	Halo	Locally_Central	0	2	2	0	0.000756949	0.000117148	0.000328826
Cosmopolitan	Donna_1984	Donna_1984	Fragaria x ananassa	Giant_Component	Locally_Central	2	2	4	282	NA	0.000132504	0.000328826
Cosmopolitan	Duluth	Duluth	Fragaria x ananassa	Giant_Component	Locally_Central	2	2	4	14	NA	0.000155731	0.000328826
Cosmopolitan	Elsinore	Elsinore	Fragaria x ananassa	Giant_Component	Locally_Central	2	2	4	300.238	NA	0.000144088	0.000328826
Cosmopolitan	Empress_of_India	Empress_of_India	Fragaria x ananassa	Giant_Component	Locally_Central	2	2	4	2	NA	0.000146435	0.000328826
Cosmopolitan	Esteem	Esteem	Fragaria x ananassa	Giant_Component	Locally_Central	2	2	4	3	NA	0.000117148	0.000328826
Cosmopolitan	Everest	Everest	Fragaria x ananassa	Giant_Component	Globally_Central	2	5	7	538.1	NA	0.000174503	0.000328826
Cosmopolitan	Felten_3001	Felten_3001	Fragaria x ananassa	Giant_Component	Locally_Central	2	4	6	100	NA	0.000163231	0.000328826
Cosmopolitan	Ferrara	Ferrara	Fragaria x ananassa	Giant_Component	Locally_Central	2	2	4	56.5	NA	0.000120746	0.000328826
Cosmopolitan	Frau_Direktor_Echtenmeyer	Frau_Direktor_Echtenmeyer	Fragaria x ananassa	Giant_Component	Locally_Central	0	2	2	0	0.000756949	0.000117148	0.000328826
Cosmopolitan	Fujiyama	Fujiyama	Fragaria x ananassa	Giant_Component	Locally_Central	0	2	2	0	0.000756949	0.000117148	0.000328826
Cosmopolitan	Gartenbaudirektor_Langer	Gartenbaudirektor_Langer	Fragaria x ananassa	Giant_Component	Marginal	2	1	3	6	NA	0.000117148	0.000328826
Cosmopolitan	Gea	Gea	Fragaria x ananassa	Giant_Component	Locally_Central	2	3	5	300.612	NA	0.00012832	0.000328826
Cosmopolitan	Goha	Goha	Fragaria x ananassa	Giant_Component	Locally_Central	2	2	4	193.762	NA	0.00014487	0.000328826
Cosmopolitan	Gold_Dollar	Gold_Dollar	Fragaria x ananassa	Giant_Component	Locally_Central	1	2	3	14	NA	0.000122296	0.000328826
Cosmopolitan	Goldsborough	Goldsborough	Fragaria x ananassa	Giant_Component	Locally_Central	2	2	4	4	NA	0.000117148	0.000328826
Cosmopolitan	Haikara	Haikara	Fragaria x ananassa	Giant_Component	Locally_Central	0	2	2	0	0.000756949	0.000117148	0.000328826
Cosmopolitan	Heart_Flush	Heart_Flush	Fragaria x ananassa	Giant_Component	Locally_Central	2	2	4	15.5	NA	0.000132707	0.000328826
Cosmopolitan	Hunn	Hunn	Fragaria x ananassa	Giant_Component	Locally_Central	2	2	4	12	NA	0.000117148	0.000328826
Cosmopolitan	Johnson's_Late	Johnson's_Late	Fragaria x ananassa	Giant_Component	Marginal	0	1	1	0	0.000756949	0.000117148	0.000328826
Cosmopolitan	Johong	Johong	Fragaria x ananassa	Giant_Component	Locally_Central	2	2	4	143.762	NA	0.000204151	0.000328826
Cosmopolitan	Kalicene	Kalicene	Fragaria x ananassa	Giant_Component	Locally_Central	2	5	7	136	NA	0.0001533	0.000328826
Cosmopolitan	Klettererdebeere	Klettererdebeere	Fragaria x ananassa	Giant_Component	Locally_Central	0	2	2	0	0.000756949	0.000117148	0.000328826
Cosmopolitan	Kohuku	Kohuku	Fragaria x ananassa	Halo	Locally_Central	0	2	2	0	0.000756949	0.000117148	0.000328826
Cosmopolitan	Krasavitsa	Krasavitsa	Fragaria x ananassa	Giant_Component	Locally_Central	2	2	4	80	NA	0.000120793	0.000328826
Cosmopolitan	Ladies'_Pine	Ladies'_Pine	Fragaria x ananassa	Giant_Component	Locally_Central	1	2	3	2	NA	0.000117148	0.000328826
Cosmopolitan	Lady_Finger	Lady_Finger	Fragaria x ananassa	Halo	Locally_Central	0	2	2	0	0.000756949	0.000117148	0.000328826
Cosmopolitan	Lord_Suffield	Lord_Suffield	Fragaria x ananassa	Giant_Component	Locally_Central	2	2	4	2	NA	0.000146435	0.000328826
Cosmopolitan	Lucie_Boiselet	Lucie_Boiselet	Fragaria x ananassa	Giant_Component	Marginal	0	1	1	0	0.000756949	0.000117148	0.000328826
Cosmopolitan	Macherauch's_Dauerernte	Macherauch's_Dauerernte	Fragaria x ananassa	Giant_Component	Marginal	2	1	3	276.5	NA	0.000156484	0.000328826
Cosmopolitan	Madame_Poincare	Madame_Poincare	Fragaria x ananassa	Giant_Component	Locally_Central	2	2	4	6	NA	0.000117148	0.000328826
Cosmopolitan	Marguerite_Lebreton	Marguerite_Lebreton	Fragaria x ananassa	Giant_Component	Globally_Central	1	3	4	1138.75	NA	0.00143252	0.000328826
Cosmopolitan	Maxim	Maxim	Fragaria x ananassa	Giant_Component	Locally_Central	0	2	2	0	0.000756949	0.000117148	0.000328826
Cosmopolitan	McKinley	McKinley	Fragaria x ananassa	Halo	Locally_Central	0	2	2	0	0.000756949	0.000117148	0.000328826
Cosmopolitan	Mount_Vernon	Mount_Vernon	Fragaria x ananassa	Giant_Component	Locally_Central	1	2	3	2	NA	0.000117148	0.000328826
Cosmopolitan	Mr._P	Mr._P	Fragaria x ananassa	Giant_Component	Locally_Central	2	2	4	4	NA	0.000117148	0.000328826
Cosmopolitan	Nadezhda	Nadezhda	Fragaria x ananassa	Giant_Component	Locally_Central	2	2	4	62	NA	0.00012933	0.000328826
Cosmopolitan	Northerner	Northerner	Fragaria x ananassa	Giant_Component	Locally_Central	2	2	4	57.2941	NA	0.000117177	0.000328826
Cosmopolitan	Ostara	Ostara	Fragaria x ananassa	Giant_Component	Globally_Central	2	3	5	375.5	NA	0.000237407	0.000328826
Cosmopolitan	PI551412	Cyclone	Fragaria x ananassa	Giant_Component	Locally_Central	2	3	5	274.383	NA	0.000157968	0.000328826
Cosmopolitan	PI551557	Yachiyo	Fragaria x ananassa	Giant_Component	Globally_Central	2	2	4	1047.28	NA	0.000377416	0.000328826
Cosmopolitan	PI551808	Stoplight	Fragaria x ananassa	Giant_Component	Locally_Central	2	2	4	185	NA	0.000138008	0.000328826
Cosmopolitan	PI551840	Protem	Fragaria x ananassa	Giant_Component	Locally_Central	2	2	4	60.5	NA	0.000121324	0.000328826
Cosmopolitan	PI551863	Himiko	Fragaria x ananassa	Giant_Component	Globally_Central	2	3	5	2504.87	NA	0.0011204	0.000328826
Cosmopolitan	PI616681	Primetime	Fragaria x ananassa	Giant_Component	Locally_Central	2	2	4	76	NA	0.000140145	0.000328826
Cosmopolitan	PI616854	Emily	Fragaria x ananassa	Giant_Component	Locally_Central	2	2	4	184.667	NA	0.000128332	0.000328826
Cosmopolitan	PI616860	Venta	Fragaria x ananassa	Giant_Component	Globally_Central	2	10	12	326	NA	0.000120005	0.000328826
Cosmopolitan	PI664334	Flamenco	Fragaria x ananassa	Giant_Component	Marginal	2	1	3	82.1714	NA	0.000159592	0.000328826
Cosmopolitan	PI664363	Herzberg's_Triumph	Fragaria x ananassa	Giant_Component	Locally_Central	2	2	4	18	NA	0.000117148	0.000328826
Cosmopolitan	Planasa_92-61	Planasa_92-61	Fragaria x ananassa	Halo	Locally_Central	0	4	4	0	0	0.000117148	0.000328826
Cosmopolitan	Pretty_Beauty	Pretty_Beauty	Fragaria x ananassa	Giant_Component	Locally_Central	2	2	4	4.5	NA	0.000139114	0.000328826
Cosmopolitan	Prinz_Julius_Ernst	Prinz_Julius_Ernst	Fragaria x ananassa	Giant_Component	Marginal	1	1	2	92.5	NA	0.000138818	0.000328826
Cosmopolitan	Productive	Productive	Fragaria x ananassa	Giant_Component	Locally_Central	2	2	4	32	NA	0.000146435	0.000328826
Cosmopolitan	PS-3003	PS-3003	Fragaria x ananassa	Giant_Component	Locally_Central	0	4	4	0	0.00113542	0.000117148	0.000328826
Cosmopolitan	Roter_Elefant	Roter_Elefant	Fragaria x ananassa	Giant_Component	Marginal	0	1	1	0	0.000378475	0.000117148	0.000328826
Cosmopolitan	Rubinovy_Kulon	Rubinovy_Kulon	Fragaria x ananassa	Giant_Component	Locally_Central	2	3	5	88	NA	0.000131384	0.000328826
Cosmopolitan	Sagahonoka	Sagahonoka	Fragaria x ananassa	Giant_Component	Locally_Central	2	2	4	192.133	NA	0.000165023	0.000328826
Cosmopolitan	Saint_Antoine_di_Padua	Saint_Antoine_di_Padua	Fragaria x ananassa	Giant_Component	Locally_Central	2	2	4	32	NA	0.000117835	0.000328826
Cosmopolitan	Senga_Rigensa	Senga_Rigensa	Fragaria x ananassa	Giant_Component	Locally_Central	0	2	2	0	0.000756949	0.000117148	0.000328826
Cosmopolitan	Seolhyang	Seolhyang	Fragaria x ananassa	Giant_Component	Locally_Central	2	2	4	145.467	NA	0.000185104	0.000328826
Cosmopolitan	Shikinari	Shikinari	Fragaria x ananassa	Giant_Component	Locally_Central	0	2	2	0	0.000756949	0.000117148	0.000328826
Cosmopolitan	Sir_Harry	Sir_Harry	Fragaria x ananassa	Giant_Component	Broker	2	1	3	882.754	NA	0.000900357	0.000328826
Cosmopolitan	Sonora	Sonora	Fragaria x ananassa	Giant_Component	Locally_Central	2	2	4	4	NA	0.000117148	0.000328826
Cosmopolitan	Sophie	Sophie	Fragaria x ananassa	Giant_Component	Locally_Central	2	2	4	227.833	NA	0.000123363	0.000328826
Cosmopolitan	Suhong	Suhong	Fragaria x ananassa	Giant_Component	Locally_Central	2	2	4	122.667	NA	0.000146927	0.000328826
Cosmopolitan	Sweet_Ann	Sweet_Ann	Fragaria x ananassa	Halo	Locally_Central	2	2	4	4	NA	0.000117148	0.000328826
Cosmopolitan	The_Bedford	The_Bedford	Fragaria x ananassa	Giant_Component	Locally_Central	2	2	4	4	NA	0.000118979	0.000328826
Cosmopolitan	Tonehoppe	Tonehoppe	Fragaria x ananassa	Giant_Component	Locally_Central	2	2	4	117.526	NA	0.000118069	0.000328826
Cosmopolitan	Van_Deman	Van_Deman	Fragaria x ananassa	Giant_Component	Globally_Central	2	2	4	1109	NA	0.0012589	0.000328826
Cosmopolitan	Winterstar	Winterstar	Fragaria x ananassa	Giant_Component	Globally_Central	2	13	15	3424.5	NA	0.000159086	0.000328826
Cosmopolitan	PI551509	Cheam	Fragaria x ananassa	Giant_Component	Globally_Central	2	3	5	1412.87	NA	0.000246705	0.000323688
Cosmopolitan	Redlands_Promise	Redlands_Promise	Fragaria x ananassa	Giant_Component	Marginal	0	1	1	0	0.000733295	0.000115318	0.000323688
Cosmopolitan	Goldsmith	Goldsmith	Fragaria x ananassa	Giant_Component	Globally_Central	2	7	9	1083.71	NA	0.00015094	0.000321119
Cosmopolitan	Corvallis	Corvallis	Fragaria x ananassa	Giant_Component	Locally_Central	2	7	9	202.117	NA	0.0002589	0.000319874
Cosmopolitan	Deutsche_Perle	Deutsche_Perle	Fragaria x ananassa	Giant_Component	Marginal	2	1	3	12	NA	0.000218738	0.00031855
Cosmopolitan	Redlands_Hope	Redlands_Hope	Fragaria x ananassa	Giant_Component	Marginal	2	1	3	16.3929	NA	0.00013925	0.00031855
Cosmopolitan	The_Sun	The_Sun	Fragaria x ananassa	Giant_Component	Locally_Central	0	4	4	0	0.00483036	0.000432356	0.000313412
Cosmopolitan	Avant_Tout	Avant_Tout	Fragaria x ananassa	Giant_Component	Marginal	0	1	1	0	0.00213779	0.000224	0.000308274
Cosmopolitan	Centennial	Centennial	Fragaria x ananassa	Giant_Component	Marginal	2	0	2	0	NA	0.000109827	0.000308274
Cosmopolitan	Comte_de_Paris	Comte_de_Paris	Fragaria x ananassa	Giant_Component	Marginal	1	1	2	20.1429	NA	0.000224164	0.000308274
Cosmopolitan	Herbstfreude	Herbstfreude	Fragaria x ananassa	Giant_Component	Marginal	2	1	3	24	NA	0.000148266	0.000308274
Cosmopolitan	Inga_1995	Inga_1995	Fragaria x ananassa	Giant_Component	Broker	2	1	3	341	NA	0.000137432	0.000308274
Cosmopolitan	Maroochy_Blaze	Maroochy_Blaze	Fragaria x ananassa	Giant_Component	Marginal	2	1	3	118.39	NA	0.000134402	0.000308274
Cosmopolitan	PI551831	Sumas	Fragaria x ananassa	Giant_Component	Globally_Central	2	4	6	569.886	NA	0.000136727	0.000308274
Cosmopolitan	Planasa_86-175	Planasa_86-175	Fragaria x ananassa	Giant_Component	Locally_Central	0	3	3	0	0.000283856	0.000109827	0.000308274
Cosmopolitan	Yael	Yael	Fragaria x ananassa	Giant_Component	Marginal	2	1	3	86.7778	NA	0.000192342	0.000308274
Cosmopolitan	PI551504	Olympus	Fragaria x ananassa	Giant_Component	Globally_Central	2	11	13	1221.28	NA	0.000135907	0.000305705
Cosmopolitan	Maytime	Maytime	Fragaria x ananassa	Giant_Component	Globally_Central	2	5	7	750.102	NA	0.000945771	0.000303136
Cosmopolitan	Parry	Parry	Fragaria x ananassa	Giant_Component	Globally_Central	1	2	3	646.167	NA	0.000386089	0.000303136
Cosmopolitan	PI551585	Delite	Fragaria x ananassa	Giant_Component	Marginal	2	1	3	182.183	NA	0.00016655	0.000300567
Cosmopolitan	Shuster	Shuster	Fragaria x ananassa	Giant_Component	Locally_Central	2	2	4	61	NA	0.000121038	0.000297998
Cosmopolitan	PI551917	Dover	Fragaria x ananassa	Giant_Component	Globally_Central	2	8	10	2721.09	NA	0.00110397	0.000290311
Cosmopolitan	PI664330	Klonmore	Fragaria x ananassa	Giant_Component	Globally_Central	2	7	9	718.751	NA	0.00050472	0.00028995
Cosmopolitan	77C036P604	Santana	Fragaria x ananassa	Giant_Component	Globally_Central	2	3	5	369	NA	0.000127873	0.000287722
Cosmopolitan	Americus	Americus	Fragaria x ananassa	Giant_Component	Locally_Central	2	2	4	52	NA	0.000104566	0.000287722
Cosmopolitan	Ana_Maria	Ana_Maria	Fragaria x ananassa	Giant_Component	Marginal	2	1	3	64	NA	0.000103878	0.000287722
Cosmopolitan	Atkins_Continuity	Atkins_Continuity	Fragaria x ananassa	Giant_Component	Marginal	0	1	1	0	0.000567712	0.000102505	0.000287722
Cosmopolitan	Cambridge_34-4-5	Cambridge_34-4-5	Fragaria x ananassa	Giant_Component	Locally_Central	2	4	6	146	NA	0.000330852	0.000287722
Cosmopolitan	Cartuno	Cartuno	Fragaria x ananassa	Giant_Component	Locally_Central	2	2	4	6	NA	0.000102505	0.000287722
Cosmopolitan	Chiyoda	Chiyoda	Fragaria x ananassa	Giant_Component	Locally_Central	2	2	4	152.5	NA	0.000105414	0.000287722
Cosmopolitan	Coogee	Coogee	Fragaria x ananassa	Giant_Component	Marginal	2	1	3	284.952	NA	0.00016056	0.000287722
Cosmopolitan	Demetra	Demetra	Fragaria x ananassa	Giant_Component	Marginal	2	1	3	232.5	NA	0.00015218	0.000287722
Cosmopolitan	Duc_de_Malakoff	Duc_de_Malakoff	Fragaria x ananassa	Giant_Component	Marginal	2	1	3	90	NA	0.000230815	0.000287722
Cosmopolitan	Empereur_Nicolas	Empereur_Nicolas	Fragaria x ananassa	Giant_Component	Marginal	0	1	1	0	0.000567712	0.000102505	0.000287722
Cosmopolitan	Hadas	Hadas	Fragaria x ananassa	Giant_Component	Marginal	2	1	3	261.524	NA	0.00015317	0.000287722
Cosmopolitan	Hamburg	Hamburg	Fragaria x ananassa	Giant_Component	Marginal	2	1	3	24	NA	0.00015696	0.000287722
Cosmopolitan	Harmony	Harmony	Fragaria x ananassa	Giant_Component	Marginal	2	1	3	172.5	NA	0.000113838	0.000287722
Cosmopolitan	Harvester	Harvester	Fragaria x ananassa	Giant_Component	Locally_Central	0	3	3	0	0.00132466	0.000102505	0.000287722
Cosmopolitan	Herut	Herut	Fragaria x ananassa	Giant_Component	Marginal	2	1	3	106.476	NA	0.000150289	0.000287722
Cosmopolitan	Unknown_FC_071	Unknown_chiloensis_071	Fragaria chiloensis	Giant_Component	Marginal	0	1	1	0	0.0186532	0.00147271	0
Cosmopolitan	Late_Leopold	Late_Leopold	Fragaria x ananassa	Giant_Component	Marginal	0	1	1	0	0.000567712	0.000102505	0.000287722
Cosmopolitan	Leader	Leader	Fragaria x ananassa	Giant_Component	Locally_Central	0	2	2	0	0.00350089	0.00032948	0.000287722
Cosmopolitan	Macherauch's_Spaternte	Macherauch's_Spaternte	Fragaria x ananassa	Giant_Component	Marginal	2	1	3	60	NA	0.000102687	0.000287722
Cosmopolitan	Meiho	Meiho	Fragaria x ananassa	Giant_Component	Locally_Central	2	3	5	228.424	NA	0.000125862	0.000287722
Cosmopolitan	Murray	Murray	Fragaria x ananassa	Giant_Component	Marginal	0	1	1	0	0.000567712	0.000102505	0.000287722
Cosmopolitan	Nettie	Nettie	Fragaria x ananassa	Giant_Component	Locally_Central	2	2	4	20.5	NA	0.000112458	0.000287722
Cosmopolitan	Northstar	Northstar	Fragaria x ananassa	Giant_Component	Marginal	2	1	3	73	NA	0.000102776	0.000287722
Cosmopolitan	Oda	Oda	Fragaria x ananassa	Giant_Component	Marginal	2	1	3	264.233	NA	0.000118566	0.000287722
Cosmopolitan	Onda	Onda	Fragaria x ananassa	Giant_Component	Locally_Central	2	2	4	225.444	NA	0.000108765	0.000287722
Cosmopolitan	Palmyre_Berger	Palmyre_Berger	Fragaria x ananassa	Giant_Component	Marginal	1	1	2	62.1429	NA	0.000255429	0.000287722
Cosmopolitan	Persikovaya	Persikovaya	Fragaria x ananassa	Giant_Component	Marginal	0	1	1	0	0.000567712	0.000102505	0.000287722
Cosmopolitan	PI551535	Atlas	Fragaria x ananassa	Giant_Component	Marginal	2	1	3	243.417	NA	0.000129612	0.000287722
Cosmopolitan	PI551603	Vibrant	Fragaria x ananassa	Giant_Component	Globally_Central	2	3	5	3366.55	NA	0.00109249	0.000287722
Cosmopolitan	PI551755	Red_Giant	Fragaria x ananassa	Giant_Component	Locally_Central	2	2	4	102.6	NA	0.000138981	0.000287722
Cosmopolitan	PI616616	Don	Fragaria x ananassa	Giant_Component	Broker	2	1	3	366.899	NA	0.00011651	0.000287722
Cosmopolitan	PI664343	Evangeline	Fragaria x ananassa	Giant_Component	Marginal	2	1	3	164.975	NA	0.000156188	0.000287722
Cosmopolitan	Rhapsody	Rhapsody	Fragaria x ananassa	Giant_Component	Locally_Central	2	2	4	189	NA	0.000113887	0.000287722
Cosmopolitan	San_Miguel	San_Miguel	Fragaria x ananassa	Giant_Component	Broker	2	1	3	444.667	NA	0.000105905	0.000287722
Cosmopolitan	Senga_Precosa	Senga_Precosa	Fragaria x ananassa	Giant_Component	Globally_Central	2	2	4	902.006	NA	0.000208388	0.000287722
Cosmopolitan	Southland	Southland	Fragaria x ananassa	Giant_Component	Globally_Central	2	4	6	2732.69	NA	0.00133628	0.000287722
Cosmopolitan	Treasure	Treasure	Fragaria x ananassa	Giant_Component	Globally_Central	2	2	4	325.125	NA	0.000192152	0.000287722
Cosmopolitan	Ydun	Ydun	Fragaria x ananassa	Giant_Component	Locally_Central	2	6	8	250.867	NA	0.000119593	0.000282584
Cosmopolitan	ARK_5431	ARK_5431	Fragaria x ananassa	Giant_Component	Locally_Central	2	2	4	295.758	NA	0.000148382	0.000272309
Cosmopolitan	PI551613	Earlidawn	Fragaria x ananassa	Giant_Component	Globally_Central	2	5	7	933.81	NA	0.000174469	0.000272309
Cosmopolitan	Alice	Alice	Fragaria x ananassa	Giant_Component	Marginal	2	1	3	10	NA	9.5183e-05	0.000267171
Cosmopolitan	Maroochy_Starfire	Maroochy_Starfire	Fragaria x ananassa	Giant_Component	Marginal	2	1	3	55.2782	NA	0.000138815	0.000267171
Cosmopolitan	Unknown_FV_022	Unknown_virginiana_022	Fragaria virginiana	Giant_Component	Marginal	0	1	1	0	0.00938575	0.000770217	0
Cosmopolitan	Vimazanta	Vimazanta	Fragaria x ananassa	Giant_Component	Marginal	2	1	3	172.667	NA	0.000116075	0.000267171
Cosmopolitan	PI551652	Headliner	Fragaria x ananassa	Giant_Component	Globally_Central	2	2	4	791.353	NA	0.000369162	0.000260237
Cosmopolitan	Annelie	Annelie	Fragaria x vescana	Giant_Component	Marginal	2	1	3	38	NA	9.20632e-05	0.000256895
Cosmopolitan	PI551575	Louise	Fragaria x ananassa	Giant_Component	Locally_Central	2	2	4	67.1503	NA	0.000143266	0.000256895
Cosmopolitan	Burrill	Burrill	Fragaria x ananassa	Giant_Component	Locally_Central	2	2	4	62.95	NA	0.000247402	0.000251757
Cosmopolitan	Redcrop	Redcrop	Fragaria x ananassa	Giant_Component	Marginal	2	1	3	49.2143	NA	0.000118268	0.000251757
Cosmopolitan	Utah_Shipper	Utah_Shipper	Fragaria x ananassa	Giant_Component	Marginal	2	1	3	56.7976	NA	0.000111579	0.000251757
Cosmopolitan	ORUS_850-48	ORUS_850-48	Fragaria x ananassa	Giant_Component	Globally_Central	2	3	5	951.797	NA	0.00012534	0.000251511
Cosmopolitan	PI637957	Pinnacle	Fragaria x ananassa	Giant_Component	Globally_Central	2	4	6	1023.29	NA	9.49143e-05	0.000246622
Cosmopolitan	Adina	Adina	Fragaria x ananassa	Giant_Component	Marginal	2	1	3	10.8929	NA	9.47603e-05	0.000246619
Cosmopolitan	Aimei	Aimei	Fragaria x ananassa	Giant_Component	Marginal	0	1	1	0	0.000378475	8.78612e-05	0.000246619
Cosmopolitan	Amaou	Amaou	Fragaria x ananassa	Giant_Component	Marginal	2	1	3	28.3667	NA	9.48048e-05	0.000246619
Cosmopolitan	Ananas_de_Guemene	Ananas_de_Guemene	Fragaria x ananassa	Giant_Component	Marginal	1	1	2	1	NA	8.78612e-05	0.000246619
Cosmopolitan	Arizona	Arizona	Fragaria x ananassa	Giant_Component	Marginal	1	1	2	7	NA	8.78612e-05	0.000246619
Cosmopolitan	Arnavutkoy	Arnavutkoy	Fragaria x ananassa	Giant_Component	Marginal	0	1	1	0	0.000378475	8.78612e-05	0.000246619
Cosmopolitan	Aurora_1955	Aurora_1955	Fragaria x ananassa	Giant_Component	Marginal	2	1	3	9	NA	8.99488e-05	0.000246619
Cosmopolitan	Aussiegem	Aussiegem	Fragaria x ananassa	Giant_Component	Marginal	2	1	3	26.5	NA	8.91934e-05	0.000246619
Cosmopolitan	Baeza	Baeza	Fragaria x ananassa	Giant_Component	Marginal	2	1	3	8	NA	8.78612e-05	0.000246619
Cosmopolitan	Bella	Bella	Fragaria x ananassa	Giant_Component	Locally_Central	0	2	2	0	0.000378475	8.78612e-05	0.000246619
Cosmopolitan	Bemanil	Bemanil	Fragaria x ananassa	Giant_Component	Marginal	2	1	3	35	NA	8.84855e-05	0.000246619
Cosmopolitan	Benihomalei	Benihomalei	Fragaria x ananassa	Giant_Component	Marginal	0	1	1	0	0.000378475	8.78612e-05	0.000246619
Cosmopolitan	Bicton_Pine	Bicton_Pine	Fragaria x ananassa	Giant_Component	Marginal	1	1	2	1	NA	8.78612e-05	0.000246619
Cosmopolitan	Bidwell	Bidwell	Fragaria x ananassa	Giant_Component	Marginal	1	1	2	2	NA	8.78612e-05	0.000246619
Cosmopolitan	Black_Defiance	Black_Defiance	Fragaria x ananassa	Giant_Component	Marginal	2	1	3	5.5	NA	9.5183e-05	0.000246619
Cosmopolitan	Bliss	Bliss	Fragaria x ananassa	Giant_Component	Marginal	2	1	3	2	NA	8.78612e-05	0.000246619
Cosmopolitan	Brighton_Pine	Brighton_Pine	Fragaria x ananassa	Giant_Component	Marginal	1	1	2	5	NA	8.78612e-05	0.000246619
Cosmopolitan	Brio	Brio	Fragaria x ananassa	Giant_Component	Marginal	2	1	3	83	NA	9.18022e-05	0.000246619
Cosmopolitan	Bush_Cluster	Bush_Cluster	Fragaria x ananassa	Giant_Component	Marginal	2	1	3	12	NA	8.78612e-05	0.000246619
Cosmopolitan	Carisma	Carisma	Fragaria x ananassa	Giant_Component	Locally_Central	2	2	4	315.024	NA	0.000124077	0.000246619
Cosmopolitan	Carrie	Carrie	Fragaria x ananassa	Giant_Component	Marginal	1	1	2	14	NA	8.78612e-05	0.000246619
Cosmopolitan	Chizuru	Chizuru	Fragaria x ananassa	Giant_Component	Marginal	2	1	3	7	NA	0.000136648	0.000246619
Cosmopolitan	Chunxiang	Chunxiang	Fragaria x ananassa	Giant_Component	Locally_Central	0	2	2	0	0.000378475	8.78612e-05	0.000246619
Cosmopolitan	Cigaline	Cigaline	Fragaria x ananassa	Giant_Component	Marginal	2	1	3	77.1167	NA	0.000107403	0.000246619
Cosmopolitan	Cinderella	Cinderella	Fragaria x ananassa	Halo	Marginal	0	1	1	0	0.000378475	8.78612e-05	0.000246619
Cosmopolitan	CIVRI30	CIVRI30	Fragaria x ananassa	Halo	Locally_Central	0	3	3	0	0.00113542	8.78612e-05	0.000246619
Cosmopolitan	Commander_1890	Commander_1890	Fragaria x ananassa	Giant_Component	Locally_Central	2	2	4	3.5	NA	9.60982e-05	0.000246619
Cosmopolitan	Commander_1989	Commander_1989	Fragaria x ananassa	Giant_Component	Locally_Central	2	2	4	140	NA	0.000272736	0.000246619
Cosmopolitan	Commonwealth	Commonwealth	Fragaria x ananassa	Halo	Marginal	0	1	1	0	0.000378475	8.78612e-05	0.000246619
Cosmopolitan	Dagmar	Dagmar	Fragaria x ananassa	Giant_Component	Marginal	2	1	3	35	NA	9.00484e-05	0.000246619
Cosmopolitan	Daikanko	Daikanko	Fragaria x ananassa	Giant_Component	Marginal	0	1	1	0	0.000378475	8.78612e-05	0.000246619
Cosmopolitan	Darboise	Darboise	Fragaria x ananassa	Giant_Component	Marginal	2	1	3	94.8833	NA	0.000103393	0.000246619
Cosmopolitan	Darflash	Darflash	Fragaria x ananassa	Giant_Component	Marginal	2	1	3	91	NA	9.61625e-05	0.000246619
Cosmopolitan	Darlibelle	Darlibelle	Fragaria x ananassa	Giant_Component	Marginal	2	1	3	127.167	NA	0.000101278	0.000246619
Cosmopolitan	Deutsch_Evern_Bromba	Deutsch_Evern_Bromba	Fragaria x ananassa	Giant_Component	Marginal	2	1	3	15	NA	8.93842e-05	0.000246619
Cosmopolitan	Docteur_Morere	Docteur_Morere	Fragaria x ananassa	Giant_Component	Locally_Central	2	2	4	234.143	NA	0.000356152	0.000246619
Cosmopolitan	Downton	Downton	Fragaria x ananassa	Halo	Marginal	2	1	3	2	NA	8.78612e-05	0.000246619
Cosmopolitan	Duchess	Duchess	Fragaria x ananassa	Giant_Component	Marginal	0	1	1	0	0.000378475	8.78612e-05	0.000246619
Cosmopolitan	Dukita	Dukita	Fragaria x ananassa	Giant_Component	Marginal	0	1	1	0	0.000378475	8.78612e-05	0.000246619
Cosmopolitan	Durline	Durline	Fragaria x ananassa	Giant_Component	Marginal	0	1	1	0	0.000378475	8.78612e-05	0.000246619
Cosmopolitan	Earlisweet	Earlisweet	Fragaria x ananassa	Giant_Component	Locally_Central	0	2	2	0	0.00186872	0.000203179	0.000246619
Cosmopolitan	Early_Hathaway	Early_Hathaway	Fragaria x ananassa	Giant_Component	Marginal	2	1	3	9	NA	0.000109598	0.000246619
Cosmopolitan	El_Capitan	El_Capitan	Fragaria x ananassa	Giant_Component	Globally_Central	2	2	4	317.667	NA	8.95613e-05	0.000246619
Cosmopolitan	Elegance	Elegance	Fragaria x ananassa	Giant_Component	Globally_Central	2	2	4	317.5	NA	0.000101523	0.000246619
Cosmopolitan	Elkat	Elkat	Fragaria x ananassa	Giant_Component	Locally_Central	2	3	5	157.037	NA	0.000114408	0.000246619
Cosmopolitan	Elton	Elton	Fragaria x ananassa	Giant_Component	Locally_Central	0	2	2	0	0.00963307	0.000803999	0.000246619
Cosmopolitan	EM881	EM881	Fragaria x ananassa	Giant_Component	Locally_Central	2	3	5	269.367	NA	0.000109543	0.000246619
Cosmopolitan	Empereur_du_Maroc	Empereur_du_Maroc	Fragaria x ananassa	Giant_Component	Locally_Central	0	2	2	0	0.00205796	0.000217823	0.000246619
Cosmopolitan	Enhance	Enhance	Fragaria x ananassa	Giant_Component	Marginal	2	1	3	7	NA	9.88439e-05	0.000246619
Cosmopolitan	Erie	Erie	Fragaria x ananassa	Giant_Component	Marginal	2	1	3	61	NA	0.000113294	0.000246619
Cosmopolitan	Eris	Eris	Fragaria x ananassa	Giant_Component	Marginal	2	1	3	31.1712	NA	0.000115776	0.000246619
Cosmopolitan	Euresko	Euresko	Fragaria x ananassa	Giant_Component	Globally_Central	2	6	8	13044	NA	0.00181998	0.000246619
Cosmopolitan	Fay	Fay	Fragaria x ananassa	Giant_Component	Marginal	0	1	1	0	0.000378475	8.78612e-05	0.000246619
Cosmopolitan	Feltar	Feltar	Fragaria x ananassa	Giant_Component	Marginal	2	0	2	0	NA	8.89138e-05	0.000246619
Cosmopolitan	Fertilite	Fertilite	Fragaria x ananassa	Giant_Component	Marginal	2	1	3	2	NA	8.78612e-05	0.000246619
Cosmopolitan	Fillmore	Fillmore	Fragaria x ananassa	Halo	Marginal	0	1	1	0	0.000378475	8.78612e-05	0.000246619
Cosmopolitan	Finn	Finn	Fragaria x ananassa	Giant_Component	Marginal	1	1	2	20.6667	NA	8.80033e-05	0.000246619
Cosmopolitan	Frances_Cleveland	Frances_Cleveland	Fragaria x ananassa	Giant_Component	Marginal	1	1	2	11	NA	8.78612e-05	0.000246619
Cosmopolitan	Frida	Frida	Fragaria x ananassa	Giant_Component	Marginal	2	1	3	121.983	NA	9.47184e-05	0.000246619
Cosmopolitan	Frigg	Frigg	Fragaria x ananassa	Giant_Component	Marginal	2	1	3	114	NA	9.15174e-05	0.000246619
Cosmopolitan	Fructana	Fructana	Fragaria x ananassa	Giant_Component	Marginal	2	1	3	47	NA	8.79899e-05	0.000246619
Cosmopolitan	Fulton	Fulton	Fragaria x ananassa	Giant_Component	Marginal	2	1	3	11	NA	0.000106066	0.000246619
Cosmopolitan	G19	G19	Fragaria x ananassa	Giant_Component	Marginal	2	1	3	112.886	NA	9.78999e-05	0.000246619
Cosmopolitan	Galychanka	Galychanka	Fragaria x ananassa	Giant_Component	Marginal	0	1	1	0	0.000378475	8.78612e-05	0.000246619
Cosmopolitan	General_de_Castelman	General_de_Castelman	Fragaria x ananassa	Giant_Component	Marginal	0	1	1	0	0.000378475	8.78612e-05	0.000246619
Cosmopolitan	General_de_Castelnau	General_de_Castelnau	Fragaria x ananassa	Giant_Component	Marginal	0	1	1	0	0.000378475	8.78612e-05	0.000246619
Cosmopolitan	Gento	Gento	Fragaria x ananassa	Giant_Component	Locally_Central	0	5	5	0	0.00146659	0.000172062	0.000246619
Cosmopolitan	Georgia_Mammoth	Georgia_Mammoth	Fragaria x ananassa	Giant_Component	Locally_Central	0	2	2	0	0.00170314	0.000190366	0.000246619
Cosmopolitan	Giant_Framboise	Giant_Framboise	Fragaria x ananassa	Giant_Component	Marginal	2	1	3	29	NA	8.78612e-05	0.000246619
Cosmopolitan	Givons_Late	Givons_Late	Fragaria x ananassa	Giant_Component	Marginal	0	1	1	0	0.000378475	8.78612e-05	0.000246619
Cosmopolitan	Glasa	Glasa	Fragaria x ananassa	Giant_Component	Marginal	2	1	3	33	NA	9.47236e-05	0.000246619
Cosmopolitan	Glen	Glen	Fragaria x ananassa	Giant_Component	Marginal	2	1	3	20	NA	8.78612e-05	0.000246619
Cosmopolitan	Glenciss	Glenciss	Fragaria x ananassa	Giant_Component	Marginal	2	1	3	26	NA	8.78612e-05	0.000246619
Cosmopolitan	Great_American	Great_American	Fragaria x ananassa	Halo	Marginal	0	1	1	0	0.000378475	8.78612e-05	0.000246619
Cosmopolitan	Great_Scott	Great_Scott	Fragaria x ananassa	Giant_Component	Marginal	2	1	3	2	NA	8.78612e-05	0.000246619
Cosmopolitan	Heflin	Heflin	Fragaria x ananassa	Giant_Component	Marginal	0	1	1	0	0.000378475	8.78612e-05	0.000246619
Cosmopolitan	Heidi	Heidi	Fragaria x ananassa	Giant_Component	Locally_Central	2	2	4	90.5667	NA	9.07648e-05	0.000246619
Cosmopolitan	Hella	Hella	Fragaria x ananassa	Giant_Component	Marginal	0	1	1	0	0.000378475	8.78612e-05	0.000246619
Cosmopolitan	Herald	Herald	Fragaria x ananassa	Halo	Marginal	0	1	1	0	0.000378475	8.78612e-05	0.000246619
Cosmopolitan	Hilton	Hilton	Fragaria x ananassa	Giant_Component	Marginal	1	1	2	3	NA	8.96917e-05	0.000246619
Cosmopolitan	Himesodachi	Himesodachi	Fragaria x ananassa	Giant_Component	Marginal	0	1	1	0	0.000378475	8.78612e-05	0.000246619
Cosmopolitan	Hollis	Hollis	Fragaria x ananassa	Halo	Marginal	0	1	1	0	0.000378475	8.78612e-05	0.000246619
Cosmopolitan	Hooker's_Seedling	Hooker's_Seedling	Fragaria x ananassa	Giant_Component	Marginal	0	1	1	0	0.000378475	8.78612e-05	0.000246619
Cosmopolitan	Hubach_and_Hathaway	Hubach_and_Hathaway	Fragaria x ananassa	Giant_Component	Marginal	2	1	3	20	NA	9.25517e-05	0.000246619
Cosmopolitan	Inge_Sturm	Inge_Sturm	Fragaria x ananassa	Giant_Component	Marginal	2	1	3	12	NA	0.000120352	0.000246619
Cosmopolitan	International	International	Fragaria x ananassa	Giant_Component	Marginal	1	1	2	3	NA	8.78612e-05	0.000246619
Cosmopolitan	Irma	Irma	Fragaria x ananassa	Giant_Component	Globally_Central	2	3	5	422.132	NA	9.34566e-05	0.000246619
Cosmopolitan	J._Riffaud	Joseph_Riffaud	Fragaria x ananassa	Giant_Component	Marginal	0	1	1	0	0.012765	0.00104635	0.000246619
Cosmopolitan	Joe	Joe	Fragaria x ananassa	Giant_Component	Globally_Central	2	5	7	2584.5	NA	0.000264013	0.000246619
Cosmopolitan	Junia_Smaids	Junia_Smaids	Fragaria x ananassa	Giant_Component	Marginal	1	1	2	14	NA	8.88318e-05	0.000246619
Cosmopolitan	Kalang	Kalang	Fragaria x ananassa	Giant_Component	Marginal	2	1	3	68.4272	NA	0.000129202	0.000246619
Cosmopolitan	Kaorino	Kaorino	Fragaria x ananassa	Giant_Component	Locally_Central	2	2	4	10	NA	8.78612e-05	0.000246619
Cosmopolitan	Keens_Imperial	Keens_Imperial	Fragaria x ananassa	Giant_Component	Globally_Central	1	3	4	3242	NA	0.00444329	0.000246619
Cosmopolitan	Kei210	Kei210	Fragaria x ananassa	Giant_Component	Globally_Central	2	4	6	2043.11	NA	0.00135992	0.000246619
Cosmopolitan	Kentish_Favorite	Kentish_Favorite	Fragaria x ananassa	Giant_Component	Marginal	2	1	3	5	NA	8.78612e-05	0.000246619
Cosmopolitan	Kerr_Prolific	Kerr_Prolific	Fragaria x ananassa	Giant_Component	Marginal	0	1	1	0	0.000378475	8.78612e-05	0.000246619
Cosmopolitan	Kiharu	Kiharu	Fragaria x ananassa	Giant_Component	Marginal	0	1	1	0	0.000378475	8.78612e-05	0.000246619
Cosmopolitan	Kilo	Kilo	Fragaria x ananassa	Giant_Component	Marginal	2	1	3	200	NA	0.000103866	0.000246619
Cosmopolitan	Kimberly	Kimberly	Fragaria x ananassa	Giant_Component	Marginal	2	1	3	111.167	NA	9.60756e-05	0.000246619
Cosmopolitan	Kimovka	Kimovka	Fragaria x ananassa	Halo	Marginal	0	1	1	0	0.000378475	8.78612e-05	0.000246619
Cosmopolitan	King_Cluster	King_Cluster	Fragaria x ananassa	Halo	Marginal	0	1	1	0	0.000378475	8.78612e-05	0.000246619
Cosmopolitan	Kita-ekubo	Kita-ekubo	Fragaria x ananassa	Giant_Component	Marginal	2	1	3	39.5	NA	9.56867e-05	0.000246619
Cosmopolitan	Kogyoku	Kogyoku	Fragaria x ananassa	Giant_Component	Globally_Central	2	2	4	3236.57	NA	0.00162883	0.000246619
Cosmopolitan	Konig_von_Sachsen	Konig_von_Sachsen	Fragaria x ananassa	Giant_Component	Locally_Central	0	2	2	0	0.00569117	0.000498967	0.000246619
Cosmopolitan	Konigin_Luise	Konigin_Luise	Fragaria x ananassa	Giant_Component	Locally_Central	0	2	2	0	0.00178962	0.000197059	0.000246619
Cosmopolitan	Kubenskaya	Kubenskaya	Fragaria x ananassa	Giant_Component	Marginal	0	1	1	0	0.000378475	8.78612e-05	0.000246619
Cosmopolitan	Late_Stevens	Late_Stevens	Fragaria x ananassa	Giant_Component	Globally_Central	1	2	3	5272.88	NA	0.00220363	0.000246619
Cosmopolitan	Laxtonian	Laxtonian	Fragaria x ananassa	Giant_Component	Marginal	0	1	1	0	0.000378475	8.78612e-05	0.000246619
Cosmopolitan	Laxton's_Latest	Laxton's_Latest	Fragaria x ananassa	Giant_Component	Marginal	1	1	2	3	NA	8.78612e-05	0.000246619
Cosmopolitan	Laxton's_Monarch	Laxton's_Monarch	Fragaria x ananassa	Giant_Component	Marginal	2	1	3	7	NA	8.78612e-05	0.000246619
Cosmopolitan	Laxton's_Omega	Laxton's_Omega	Fragaria x ananassa	Giant_Component	Marginal	1	1	2	22	NA	8.78612e-05	0.000246619
Cosmopolitan	Longfellow	Longfellow	Fragaria x ananassa	Giant_Component	Locally_Central	0	2	2	0	0.00179775	0.000197688	0.000246619
Cosmopolitan	Longworth	Longworth	Fragaria x ananassa	Giant_Component	Locally_Central	2	2	4	39	NA	0.000495135	0.000246619
Cosmopolitan	Lowanna	Lowanna	Fragaria x ananassa	Giant_Component	Marginal	2	1	3	115	NA	8.78612e-05	0.000246619
Cosmopolitan	Lucy	Lucy	Fragaria x ananassa	Giant_Component	Globally_Central	2	2	4	576.5	NA	9.6734e-05	0.000246619
Cosmopolitan	Lulu	Lulu	Fragaria x ananassa	Giant_Component	Marginal	2	1	3	73.4107	NA	0.00225376	0.000246619
Cosmopolitan	Luna_1934	Luna_1934	Fragaria x ananassa	Giant_Component	Marginal	2	1	3	6	NA	8.84618e-05	0.000246619
Cosmopolitan	Lvovskaya_Rannyaya	Lvovskaya_Rannyaya	Fragaria x ananassa	Giant_Component	Marginal	0	1	1	0	0.000378475	8.78612e-05	0.000246619
Cosmopolitan	Macherauch's_Marieva	Macherauch's_Marieva	Fragaria x ananassa	Giant_Component	Globally_Central	2	3	5	473.5	NA	0.000267504	0.000246619
Cosmopolitan	Madame_Lefebvre	Madame_Lefebvre	Fragaria x ananassa	Giant_Component	Marginal	0	1	1	0	0.000378475	8.78612e-05	0.000246619
Cosmopolitan	Madeira	Madeira	Fragaria x ananassa	Giant_Component	Marginal	2	1	3	4	NA	8.78612e-05	0.000246619
Cosmopolitan	Mamie	Mamie	Fragaria x ananassa	Giant_Component	Marginal	2	1	3	41.5	NA	9.07116e-05	0.000246619
Cosmopolitan	Maraline	Maraline	Fragaria x ananassa	Giant_Component	Marginal	2	1	3	119	NA	8.9696e-05	0.000246619
Cosmopolitan	Marastar	Marastar	Fragaria x ananassa	Giant_Component	Marginal	0	1	1	0	0.000378475	8.78612e-05	0.000246619
Cosmopolitan	Margherita	Margherita	Fragaria x ananassa	Giant_Component	Marginal	2	1	3	119	NA	0.000102505	0.000246619
Cosmopolitan	Marisol	Marisol	Fragaria x ananassa	Giant_Component	Marginal	2	1	3	132	NA	8.78612e-05	0.000246619
Cosmopolitan	Marrionnet_hybrid	Marrionnet_hybrid	Fragaria x ananassa	Giant_Component	Marginal	0	1	1	0	0.000378475	8.78612e-05	0.000246619
Cosmopolitan	Mascot	Mascot	Fragaria x ananassa	Giant_Component	Marginal	0	1	1	0	0.000378475	8.78612e-05	0.000246619
Cosmopolitan	Maya	Maya	Fragaria x ananassa	Halo	Marginal	0	1	1	0	0	8.78612e-05	0.000246619
Cosmopolitan	McAvoy's_Superior	McAvoy's_Superior	Fragaria x ananassa	Giant_Component	Locally_Central	2	2	4	35.5	NA	0.000504287	0.000246619
Cosmopolitan	Metcalf_Early	Metcalf_Early	Fragaria x ananassa	Halo	Marginal	0	1	1	0	0	8.78612e-05	0.000246619
Cosmopolitan	Mildred_Felten	Mildred_Felten	Fragaria x ananassa	Giant_Component	Marginal	2	1	3	2	NA	0.000127941	0.000246619
Cosmopolitan	Mingjing	Mingjing	Fragaria x ananassa	Giant_Component	Marginal	1	1	2	50	NA	8.78612e-05	0.000246619
Cosmopolitan	Minnesota	Minnesota	Fragaria x ananassa	Giant_Component	Marginal	2	1	3	15	NA	8.78612e-05	0.000246619
Cosmopolitan	Mirador	Mirador	Fragaria x ananassa	Giant_Component	Globally_Central	2	2	4	604	NA	8.78612e-05	0.000246619
Cosmopolitan	Miranda_1993	Miranda_1993	Fragaria x ananassa	Giant_Component	Marginal	2	1	3	95	NA	8.82404e-05	0.000246619
Cosmopolitan	Montana	Montana	Fragaria x ananassa	Giant_Component	Marginal	0	1	1	0	0.000378475	8.78612e-05	0.000246619
Cosmopolitan	Montevideo_Pine	Montevideo_Pine	Fragaria x ananassa	Halo	Marginal	0	1	1	0	0	8.78612e-05	0.000246619
Cosmopolitan	Moyamensing	Moyamensing	Fragaria x ananassa	Giant_Component	Marginal	1	1	2	1	NA	8.78612e-05	0.000246619
Cosmopolitan	Nb_72/13	Nb_72/13	Fragaria x ananassa	Giant_Component	Marginal	0	1	1	0	0.000378475	8.78612e-05	0.000246619
Cosmopolitan	Nelslukhnyanka	Nelslukhnyanka	Fragaria x ananassa	Giant_Component	Marginal	0	1	1	0	0.000378475	8.78612e-05	0.000246619
Cosmopolitan	Oesluhoanka	Oesluhoanka	Fragaria x ananassa	Giant_Component	Marginal	0	1	1	0	0.000378475	8.78612e-05	0.000246619
Cosmopolitan	Ottawa	Ottawa	Fragaria x ananassa	Giant_Component	Marginal	2	1	3	13	NA	9.47254e-05	0.000246619
Cosmopolitan	Parkland	Parkland	Fragaria x ananassa	Giant_Component	Marginal	2	0	2	0	NA	8.78612e-05	0.000246619
Cosmopolitan	Patty	Patty	Fragaria x ananassa	Giant_Component	Marginal	2	1	3	55	NA	9.67817e-05	0.000246619
Cosmopolitan	Paula	Paula	Fragaria x ananassa	Giant_Component	Marginal	2	1	3	42	NA	9.17796e-05	0.000246619
Cosmopolitan	Pearl_1889	Pearl_1889	Fragaria x ananassa	Giant_Component	Locally_Central	0	5	5	0	0.00454373	0.000410176	0.000246619
Cosmopolitan	PI551493	Shuksan	Fragaria x ananassa	Giant_Component	Locally_Central	2	6	8	292.267	NA	8.81758e-05	0.000246619
Cosmopolitan	PI551505	Rainier	Fragaria x ananassa	Giant_Component	Marginal	2	1	3	62	NA	8.78612e-05	0.000246619
Cosmopolitan	PI551533	Benizuru	Fragaria x ananassa	Giant_Component	Marginal	2	1	3	12	NA	8.78612e-05	0.000246619
Cosmopolitan	PI551543	Armore	Fragaria x ananassa	Giant_Component	Marginal	2	1	3	33	NA	8.96202e-05	0.000246619
Cosmopolitan	PI551560	Rosanne	Fragaria x ananassa	Giant_Component	Locally_Central	2	2	4	162	NA	9.21047e-05	0.000246619
Cosmopolitan	PI551563	Profusion	Fragaria x ananassa	Giant_Component	Marginal	0	1	1	0	0.000378475	8.78612e-05	0.000246619
Cosmopolitan	PI551570	Fortune	Fragaria x ananassa	Giant_Component	Marginal	2	0	2	0	NA	8.78612e-05	0.000246619
Cosmopolitan	PI551586	Geneva	Fragaria x ananassa	Giant_Component	Globally_Central	2	8	10	779.821	NA	0.00022022	0.000246619
Cosmopolitan	PI551610	Domanil	Fragaria x ananassa	Giant_Component	Marginal	2	1	3	16	NA	8.84046e-05	0.000246619
Cosmopolitan	PI551616	Litessa	Fragaria x ananassa	Giant_Component	Marginal	1	1	2	1	NA	8.78612e-05	0.000246619
Cosmopolitan	PI551627	Senga_Precosana	Fragaria x ananassa	Giant_Component	Marginal	2	1	3	46	NA	9.00333e-05	0.000246619
Cosmopolitan	PI551636	Badgerglo	Fragaria x ananassa	Giant_Component	Marginal	2	1	3	18.7833	NA	0.000110101	0.000246619
Cosmopolitan	PI551656	Juspa	Fragaria x ananassa	Giant_Component	Globally_Central	2	4	6	1849.42	NA	0.00215055	0.000246619
Cosmopolitan	PI551681	White_Carolina	Fragaria x ananassa	Giant_Component	Locally_Central	0	2	2	0	0.0285209	0.00226557	0.000246619
Cosmopolitan	PI551768	Repita	Fragaria x ananassa	Giant_Component	Broker	2	1	3	376.069	NA	0.000205642	0.000246619
Cosmopolitan	PI551771	Cambridge_Rearguard	Fragaria x ananassa	Giant_Component	Marginal	2	1	3	38	NA	8.7947e-05	0.000246619
Cosmopolitan	PI551800	Zefyr	Fragaria x ananassa	Giant_Component	Marginal	2	1	3	31	NA	8.79184e-05	0.000246619
Cosmopolitan	PI551809	Elvira	Fragaria x ananassa	Giant_Component	Marginal	2	1	3	39.2333	NA	0.000104558	0.000246619
Cosmopolitan	PI551906	Red_Cross	Fragaria x ananassa	Giant_Component	Marginal	2	1	3	32	NA	0.000105708	0.000246619
Cosmopolitan	PI551914	Blomidon	Fragaria x ananassa	Giant_Component	Globally_Central	2	2	4	390.375	NA	0.000105371	0.000246619
Cosmopolitan	PI551955	Trumpeter	Fragaria x ananassa	Giant_Component	Marginal	2	1	3	23.4	NA	0.000117629	0.000246619
Cosmopolitan	PI552259	Favette	Fragaria x ananassa	Giant_Component	Marginal	2	1	3	103.253	NA	9.53102e-05	0.000246619
Cosmopolitan	PI552266	Solprins	Fragaria x ananassa	Giant_Component	Marginal	2	1	3	114.983	NA	0.000148866	0.000246619
Cosmopolitan	PI616588	Rannyaya_Plotnaya	Fragaria x ananassa	Giant_Component	Marginal	2	1	3	23	NA	9.20076e-05	0.000246619
Cosmopolitan	PI616589	Delmarvel	Fragaria x ananassa	Giant_Component	Broker	2	1	3	350	NA	0.000102856	0.000246619
Cosmopolitan	PI616622	Hogyoku	Fragaria x ananassa	Giant_Component	Marginal	1	1	2	27	NA	0.000130335	0.000246619
Cosmopolitan	PI616629	Terunoka	Fragaria x ananassa	Giant_Component	Marginal	2	1	3	117.624	NA	0.000100918	0.000246619
Cosmopolitan	PI616922	Pegasus	Fragaria x ananassa	Giant_Component	Locally_Central	2	5	7	300.833	NA	0.000104442	0.000246619
Cosmopolitan	PI617019	Jonsok	Fragaria x ananassa	Giant_Component	Locally_Central	2	4	6	175	NA	9.16889e-05	0.000246619
Cosmopolitan	PI641178	Kunowase	Fragaria x ananassa	Giant_Component	Globally_Central	2	2	4	601.521	NA	0.00132268	0.000246619
Cosmopolitan	PI655969	Valley_Red	Fragaria x ananassa	Giant_Component	Globally_Central	2	4	6	491.201	NA	9.83539e-05	0.000246619
Cosmopolitan	PI664322	Winona	Fragaria x ananassa	Giant_Component	Marginal	2	1	3	97	NA	0.000105475	0.000246619
Cosmopolitan	PI664323	Symphony	Fragaria x ananassa	Giant_Component	Marginal	2	1	3	91	NA	9.65551e-05	0.000246619
Cosmopolitan	PI664345	L'Amour	Fragaria x ananassa	Giant_Component	Marginal	2	1	3	152	NA	9.31048e-05	0.000246619
Cosmopolitan	Pink_Beauty	Pink_Beauty	Fragaria x ananassa	Giant_Component	Marginal	2	1	3	2	NA	0.000102505	0.000246619
Cosmopolitan	Pink_Princess	Pink_Princess	Fragaria x ananassa	Giant_Component	Marginal	2	1	3	132.5	NA	9.5183e-05	0.000246619
Cosmopolitan	Piper	Piper	Fragaria x ananassa	Giant_Component	Marginal	0	1	1	0	0.000378475	8.78612e-05	0.000246619
Cosmopolitan	Premial	Premial	Fragaria x ananassa	Giant_Component	Marginal	1	1	2	1	NA	8.78612e-05	0.000246619
Cosmopolitan	President_Lincoln	President_Lincoln	Fragaria x ananassa	Giant_Component	Marginal	0	1	1	0	0.000378475	8.78612e-05	0.000246619
Cosmopolitan	Primek	Primek	Fragaria x ananassa	Giant_Component	Marginal	2	1	3	65	NA	8.78612e-05	0.000246619
Cosmopolitan	Primori	Primori	Fragaria x ananassa	Giant_Component	Marginal	0	1	1	0	0.000378475	8.78612e-05	0.000246619
Cosmopolitan	Princess_Dagmar	Princess_Dagmar	Fragaria x ananassa	Giant_Component	Marginal	0	1	1	0	0.00115908	0.000148266	0.000246619
Cosmopolitan	Prinevskaya	Prinevskaya	Fragaria x ananassa	Halo	Marginal	0	1	1	0	0	8.78612e-05	0.000246619
Cosmopolitan	Prolific_1899	Prolific_1899	Fragaria x ananassa	Giant_Component	Marginal	2	1	3	3	NA	8.78612e-05	0.000246619
Cosmopolitan	Puget_Summer	Puget_Summer	Fragaria x ananassa	Giant_Component	Globally_Central	2	2	4	376.902	NA	0.000105541	0.000246619
Cosmopolitan	Queen_Elisa	Queen_Elisa	Fragaria x ananassa	Giant_Component	Broker	2	1	3	321.81	NA	0.000111019	0.000246619
Cosmopolitan	Queen_of_Denmark	Queen_of_Denmark	Fragaria x ananassa	Giant_Component	Marginal	2	1	3	3	NA	0.000102505	0.000246619
Cosmopolitan	Red_Bird	Red_Bird	Fragaria x ananassa	Giant_Component	Marginal	2	1	3	5.2	NA	0.000100817	0.000246619
Cosmopolitan	Red_Jacket	Red_Jacket	Fragaria x ananassa	Giant_Component	Marginal	2	1	3	6	NA	0.000109827	0.000246619
Cosmopolitan	Red_Queen	Red_Queen	Fragaria x ananassa	Giant_Component	Marginal	0	1	1	0	0.000378475	8.78612e-05	0.000246619
Cosmopolitan	Red_Rhapsody	Red_Rhapsody	Fragaria x ananassa	Giant_Component	Marginal	2	1	3	216	NA	9.44292e-05	0.000246619
Cosmopolitan	Reine_des_Precoces	Reine_des_Precoces	Fragaria x ananassa	Giant_Component	Marginal	2	1	3	23	NA	9.88439e-05	0.000246619
Cosmopolitan	Reliance_1907	Reliance_1907	Fragaria x ananassa	Giant_Component	Marginal	2	1	3	8	NA	8.91196e-05	0.000246619
Cosmopolitan	Rheingold	Rheingold	Fragaria x ananassa	Giant_Component	Marginal	1	1	2	1	NA	8.78612e-05	0.000246619
Cosmopolitan	Richmond_Red	Richmond_Red	Fragaria x ananassa	Giant_Component	Marginal	2	1	3	8	NA	8.78612e-05	0.000246619
Cosmopolitan	Rita	Rita	Fragaria x ananassa	Giant_Component	Marginal	2	1	3	85.4857	NA	9.84673e-05	0.000246619
Cosmopolitan	Roseberry_1808	Roseberry_1808	Fragaria virginiana	Halo	Locally_Central	0	4	4	0	0	8.78612e-05	0.000246619
Cosmopolitan	Rough_Rider	Rough_Rider	Fragaria x ananassa	Giant_Component	Marginal	2	1	3	4	NA	8.78612e-05	0.000246619
Cosmopolitan	Rubygem	Rubygem	Fragaria x ananassa	Giant_Component	Marginal	2	1	3	222	NA	9.57322e-05	0.000246619
Cosmopolitan	Sabrosa	Sabrosa	Fragaria x ananassa	Halo	Marginal	2	1	3	2	NA	8.78612e-05	0.000246619
Cosmopolitan	Scarlet_Magnate	Scarlet_Magnate	Fragaria x ananassa	Halo	Marginal	0	1	1	0	0	8.78612e-05	0.000246619
Cosmopolitan	Scarlet_Queen	Scarlet_Queen	Fragaria x ananassa	Giant_Component	Locally_Central	2	2	4	66	NA	0.000230721	0.000246619
Cosmopolitan	Seal	Seal	Fragaria x ananassa	Giant_Component	Marginal	2	1	3	77.3333	NA	0.000102244	0.000246619
Cosmopolitan	Seneca_Queen	Seneca_Queen	Fragaria x ananassa	Giant_Component	Marginal	1	1	2	1	NA	8.78612e-05	0.000246619
Cosmopolitan	Serenata	Serenata	Fragaria x ananassa	Giant_Component	Marginal	2	1	3	4	NA	8.78612e-05	0.000246619
Cosmopolitan	Sherman	Sherman	Fragaria x ananassa	Giant_Component	Locally_Central	2	2	4	212.5	NA	0.00060259	0.000246619
Cosmopolitan	Shuka	Shuka	Fragaria x ananassa	Giant_Component	Marginal	0	1	1	0	0.000378475	8.78612e-05	0.000246619
Cosmopolitan	Shuofeng	Shuofeng	Fragaria x ananassa	Giant_Component	Marginal	2	1	3	2	NA	8.78612e-05	0.000246619
Cosmopolitan	Sofija	Sofija	Fragaria x ananassa	Giant_Component	Locally_Central	0	2	2	0	0	8.78612e-05	0.000246619
Cosmopolitan	Sonata	Sonata	Fragaria x ananassa	Giant_Component	Locally_Central	2	2	4	212	NA	9.91476e-05	0.000246619
Cosmopolitan	Sonja_Horstmann	Sonja_Horstmann	Fragaria x ananassa	Giant_Component	Marginal	0	1	1	0	0.000378475	8.78612e-05	0.000246619
Cosmopolitan	Splendor	Splendor	Fragaria x ananassa	Giant_Component	Locally_Central	2	2	4	250	NA	8.78612e-05	0.000246619
Cosmopolitan	St_Louis	St_Louis	Fragaria x ananassa	Giant_Component	Marginal	2	1	3	12.5	NA	9.01493e-05	0.000246619
Cosmopolitan	Star	Star	Fragaria x ananassa	Giant_Component	Marginal	0	1	1	0	0.000378475	8.78612e-05	0.000246619
Cosmopolitan	Sucambodiaberry	Sucambodiaberry	Fragaria x ananassa	Giant_Component	Marginal	0	1	1	0	0.000378475	8.78612e-05	0.000246619
Cosmopolitan	Sugarbaby	Sugarbaby	Fragaria x ananassa	Giant_Component	Locally_Central	2	2	4	177.786	NA	0.000117938	0.000246619
Cosmopolitan	T.W._Matthews	T.W._Matthews	Fragaria x ananassa	Giant_Component	Marginal	0	1	1	0	0	8.78612e-05	0.000246619
Cosmopolitan	Tallara	Tallara	Fragaria x ananassa	Giant_Component	Marginal	2	1	3	94.5139	NA	0.000121611	0.000246619
Cosmopolitan	Tamar	Tamar	Fragaria x ananassa	Giant_Component	Globally_Central	2	2	4	348	NA	0.000107937	0.000246619
Cosmopolitan	Tamir	Tamir	Fragaria x ananassa	Giant_Component	Marginal	2	1	3	186	NA	0.000115105	0.000246619
Cosmopolitan	Tardiva_di_Romagna	Tardiva_di_Romagna	Fragaria x ananassa	Giant_Component	Marginal	2	1	3	61	NA	8.95122e-05	0.000246619
Cosmopolitan	The_Duke	The_Duke	Fragaria x ananassa	Giant_Component	Marginal	1	1	2	22	NA	8.78612e-05	0.000246619
Cosmopolitan	The_Earl	The_Earl	Fragaria x ananassa	Giant_Component	Marginal	2	1	3	9	NA	9.5183e-05	0.000246619
Cosmopolitan	The_Laxton	The_Laxton	Fragaria x ananassa	Giant_Component	Marginal	2	1	3	11.5	NA	9.5755e-05	0.000246619
Cosmopolitan	Usosio	Usosio	Fragaria x ananassa	Giant_Component	Marginal	0	1	1	0	0.000378475	8.78612e-05	0.000246619
Cosmopolitan	Valeta	Valeta	Fragaria x ananassa	Giant_Component	Marginal	2	1	3	89	NA	9.82333e-05	0.000246619
Cosmopolitan	Vatra	Vatra	Fragaria x ananassa	Giant_Component	Marginal	0	1	1	0	0.000378475	8.78612e-05	0.000246619
Cosmopolitan	Veitch's_Perfection	Veitch's_Perfection	Fragaria x ananassa	Giant_Component	Marginal	2	1	3	1.5	NA	9.5183e-05	0.000246619
Cosmopolitan	Venice	Venice	Fragaria x ananassa	Giant_Component	Broker	2	1	3	933.333	NA	9.09341e-05	0.000246619
Cosmopolitan	Victoria	Victoria	Fragaria x ananassa	Giant_Component	Marginal	0	1	1	0	0.000378475	8.78612e-05	0.000246619
Cosmopolitan	Victoria_Ovata	Victoria_Ovata	Fragaria x ananassa	Halo	Marginal	0	1	1	0	0	8.78612e-05	0.000246619
Cosmopolitan	Vityaz	Vityaz	Fragaria x ananassa	Giant_Component	Marginal	2	1	3	32.1667	NA	9.8142e-05	0.000246619
Cosmopolitan	Wamberal_Beauty	Wamberal_Beauty	Fragaria x ananassa	Giant_Component	Marginal	0	1	1	0	0	8.78612e-05	0.000246619
Cosmopolitan	Warren_1876	Warren_1876	Fragaria x ananassa	Giant_Component	Marginal	0	1	1	0	0	8.78612e-05	0.000246619
Cosmopolitan	Wendy	Wendy	Fragaria x ananassa	Giant_Component	Broker	2	1	3	370.783	NA	0.000113266	0.000246619
Cosmopolitan	Westney	Westney	Fragaria x ananassa	Giant_Component	Marginal	2	1	3	15	NA	8.85226e-05	0.000246619
Cosmopolitan	Whonnock	Whonnock	Fragaria x ananassa	Giant_Component	Marginal	2	1	3	115.857	NA	9.6526e-05	0.000246619
Cosmopolitan	WSU_685	WSU_685	Fragaria x ananassa	Giant_Component	Globally_Central	2	2	4	414.267	NA	9.35581e-05	0.000246619
Cosmopolitan	Yamaska	Yamaska	Fragaria x ananassa	Giant_Component	Marginal	2	1	3	69.3	NA	9.34829e-05	0.000246619
Cosmopolitan	Rindamore	Rindamore	Fragaria x ananassa	Giant_Component	Locally_Central	2	2	4	214.028	NA	0.000157801	0.000236343
Cosmopolitan	Daroyal	Daroyal	Fragaria x ananassa	Giant_Component	Marginal	2	1	3	249	NA	9.93218e-05	0.000226068
Cosmopolitan	Rose_Ettersburg	Rose_Ettersburg	Fragaria x ananassa	Giant_Component	Globally_Central	2	10	12	9780.83	NA	0.00117693	0.000226068
Cosmopolitan	PI551434	Narcissa	Fragaria x ananassa	Giant_Component	Globally_Central	2	16	18	5849.89	NA	0.0046574	0.000219725
Cosmopolitan	PI551529	ArKing	Fragaria x ananassa	Giant_Component	Globally_Central	2	2	4	406.448	NA	0.000115962	0.000215792
Cosmopolitan	137A84	137A84	Fragaria x ananassa	Giant_Component	Locally_Central	0	3	3	0	0.000946187	7.32177e-05	0.000205516
Cosmopolitan	Aistro	Aistro	Fragaria x ananassa	Giant_Component	Marginal	2	1	3	133.4	NA	9.87162e-05	0.000205516
Cosmopolitan	Akashanomitsuko	Akashanomitsuko	Fragaria x ananassa	Giant_Component	Marginal	2	1	3	178	NA	8.86192e-05	0.000205516
Cosmopolitan	Alba	Alba	Fragaria x ananassa	Giant_Component	Marginal	2	1	3	162.6	NA	8.76335e-05	0.000205516
Cosmopolitan	Dew	Dew	Fragaria x ananassa	Giant_Component	Marginal	2	1	3	12	NA	7.32177e-05	0.000205516
Cosmopolitan	Heritage	Heritage	Fragaria x ananassa	Giant_Component	Marginal	2	1	3	16	NA	7.32177e-05	0.000205516
Cosmopolitan	Ikeko	Ikeko	Fragaria x ananassa	Halo	Marginal	0	1	1	0	0.000189237	7.32177e-05	0.000205516
Cosmopolitan	Kaho	Kaho	Fragaria x ananassa	Giant_Component	Locally_Central	0	2	2	0	0.00123004	0.000153757	0.000205516
Cosmopolitan	Kokinskaya_rannyaya	Kokinskaya_rannyaya	Fragaria x ananassa	Giant_Component	Marginal	2	1	3	40.6667	NA	7.71285e-05	0.000205516
Cosmopolitan	Manil	Manil	Fragaria x ananassa	Giant_Component	Marginal	2	0	2	0	NA	7.42978e-05	0.000205516
Cosmopolitan	Nor_J	Nor_J	Fragaria x ananassa	Giant_Component	Marginal	2	1	3	10	NA	7.32177e-05	0.000205516
Cosmopolitan	Nouhime	Nouhime	Fragaria x ananassa	Giant_Component	Marginal	2	1	3	25.8667	NA	0.000110549	0.000205516
Cosmopolitan	PI551422	Primella	Fragaria x ananassa	Giant_Component	Locally_Central	2	2	4	106.315	NA	8.31313e-05	0.000205516
Cosmopolitan	PI551754	Cesena	Fragaria x ananassa	Giant_Component	Globally_Central	2	4	6	402.717	NA	0.000134477	0.000205516
Cosmopolitan	PI551935	MDUS_4380	Fragaria x ananassa	Giant_Component	Globally_Central	2	4	6	502.229	NA	0.000226779	0.000205516
Cosmopolitan	PI616592	Selkirk	Fragaria x ananassa	Giant_Component	Globally_Central	2	2	4	367.386	NA	0.000135299	0.000205516
Cosmopolitan	PI617006	Firecracker	Fragaria x ananassa	Giant_Component	Globally_Central	2	2	4	1247.26	NA	8.71092e-05	0.000205516
Cosmopolitan	PI666635	Induka	Fragaria x ananassa	Giant_Component	Globally_Central	2	6	8	2502.7	NA	0.000677816	0.000205516
Cosmopolitan	Portia	Portia	Fragaria x ananassa	Giant_Component	Globally_Central	1	4	5	1317.56	NA	0.00107508	0.000205516
Cosmopolitan	Precoce_di_Romagna	Precoce_di_Romagna	Fragaria x ananassa	Giant_Component	Locally_Central	2	3	5	178.5	NA	9.94197e-05	0.000205516
Cosmopolitan	Renaissance	Renaissance	Fragaria x ananassa	Giant_Component	Marginal	2	0	2	0	NA	7.77405e-05	0.000205516
Cosmopolitan	Ribera	Ribera	Fragaria x ananassa	Giant_Component	Marginal	2	1	3	92.8165	NA	0.000115605	0.000205516
Cosmopolitan	Robbie	Robbie	Fragaria x ananassa	Giant_Component	Marginal	2	1	3	38	NA	7.7279e-05	0.000205516
Cosmopolitan	Rosie_1999	Rosie_1999	Fragaria x ananassa	Giant_Component	Globally_Central	2	6	8	2926.1	NA	0.00010622	0.000205516
Cosmopolitan	Rotkappchen	Rotkappchen	Fragaria x ananassa	Giant_Component	Globally_Central	2	2	4	398.25	NA	0.000521991	0.000205516
Cosmopolitan	Shuko	Shuko	Fragaria x ananassa	Giant_Component	Marginal	2	1	3	46.7333	NA	0.000105796	0.000205516
Cosmopolitan	Splendid	Splendid	Fragaria x ananassa	Giant_Component	Marginal	0	1	1	0	0.000189237	7.32177e-05	0.000205516
Cosmopolitan	Startyme	Startyme	Fragaria x ananassa	Giant_Component	Marginal	2	1	3	93.1024	NA	9.24981e-05	0.000205516
Cosmopolitan	Tennessean	Tennessean	Fragaria x ananassa	Giant_Component	Marginal	2	0	2	0	NA	7.57718e-05	0.000205516
Cosmopolitan	The_Admiral	The_Admiral	Fragaria x ananassa	Giant_Component	Marginal	1	1	2	40	NA	7.33249e-05	0.000205516
Cosmopolitan	Tudnew	Tudnew	Fragaria x ananassa	Giant_Component	Marginal	2	1	3	4	NA	7.32177e-05	0.000205516
Cosmopolitan	Vima_Tarda	Vima_Tarda	Fragaria x ananassa	Giant_Component	Marginal	2	1	3	57.6667	NA	8.4872e-05	0.000205516
Cosmopolitan	Von_Humboldt	Von_Humboldt	Fragaria x ananassa	Giant_Component	Marginal	2	1	3	211	NA	0.000128112	0.000205516
Cosmopolitan	PI551425	Bounty	Fragaria x ananassa	Giant_Component	Globally_Central	2	5	7	1100.28	NA	0.000386842	0.000197809
Cosmopolitan	Marion_Bell	Marion_Bell	Fragaria x ananassa	Giant_Component	Locally_Central	2	3	5	59.9095	NA	0.00039198	0.000185707
Cosmopolitan	Keepsake	Keepsake	Fragaria x ananassa	Giant_Component	Marginal	2	0	2	0	NA	7.24123e-05	0.000185045
Cosmopolitan	Chair's_Favorite	Chair's_Favorite	Fragaria x ananassa	Giant_Component	Globally_Central	2	4	6	380.583	NA	0.000273354	0.000184964
Cosmopolitan	Hiku	Hiku	Fragaria x ananassa	Giant_Component	Marginal	2	1	3	66	NA	7.23658e-05	0.000184964
Cosmopolitan	Middlefield	Middlefield	Fragaria x ananassa	Giant_Component	Locally_Central	0	5	5	0	0.0200199	0.00160775	0.000184964
Cosmopolitan	Montana_Progressive	Montana_Progressive	Fragaria x ananassa	Giant_Component	Marginal	1	1	2	110.5	NA	6.93963e-05	0.000184964
Cosmopolitan	PI551502	Hood	Fragaria x ananassa	Giant_Component	Globally_Central	2	10	12	833.967	NA	8.2948e-05	0.000184964
Cosmopolitan	PI551859	Redcrest	Fragaria x ananassa	Giant_Component	Globally_Central	2	4	6	1086.86	NA	0.000128701	0.000184964
Cosmopolitan	PI552271	Redgem	Fragaria x ananassa	Giant_Component	Globally_Central	2	2	4	1073.36	NA	0.000116731	0.000184964
Cosmopolitan	PI616596	Scotland	Fragaria x ananassa	Giant_Component	Marginal	2	1	3	120.738	NA	8.77212e-05	0.000184964
Cosmopolitan	Pistro	Pistro	Fragaria x ananassa	Giant_Component	Marginal	2	1	3	92.45	NA	9.28573e-05	0.000184964
Cosmopolitan	Saint_Pierre	Saint_Pierre	Fragaria x ananassa	Giant_Component	Marginal	2	1	3	247.5	NA	7.46734e-05	0.000184964
Cosmopolitan	Konvoy	Konvoy	Fragaria x ananassa	Giant_Component	Locally_Central	2	2	4	162.84	NA	0.00032837	0.00017506
Cosmopolitan	Earlimist	Earlimist	Fragaria x ananassa	Giant_Component	Marginal	2	1	3	55.444	NA	0.000106229	0.000174689
Cosmopolitan	Maroochy_Flame	Maroochy_Flame	Fragaria x ananassa	Giant_Component	Marginal	2	1	3	173.804	NA	0.000104134	0.000174689
Cosmopolitan	PI551487	Beaver	Fragaria x ananassa	Giant_Component	Locally_Central	2	2	4	84.7333	NA	0.000205843	0.000174689
Cosmopolitan	PI551562	Merrimack	Fragaria x ananassa	Giant_Component	Marginal	2	1	3	74.9556	NA	7.95437e-05	0.000174689
Cosmopolitan	PI551601	Tyee	Fragaria x ananassa	Giant_Component	Marginal	2	1	3	206.233	NA	7.62601e-05	0.000174689
Cosmopolitan	PI551602	Vesper	Fragaria x ananassa	Giant_Component	Marginal	2	1	3	86.4643	NA	8.12533e-05	0.000174689
Cosmopolitan	PI551607	Acadia	Fragaria x ananassa	Giant_Component	Marginal	2	1	3	72.4286	NA	9.18405e-05	0.000174689
Cosmopolitan	Vanguard	Vanguard	Fragaria x ananassa	Giant_Component	Globally_Central	2	2	4	2979.12	NA	0.00103582	0.000174689
Cosmopolitan	PI551403	Florida_Ninety	Fragaria x ananassa	Giant_Component	Globally_Central	1	4	5	585.841	NA	0.000279322	0.000170434
Cosmopolitan	PI551584	Dabreak	Fragaria x ananassa	Giant_Component	Broker	2	1	3	1759.6	NA	0.000338107	0.000170353
Cosmopolitan	Winterdawn	Winterdawn	Fragaria x ananassa	Giant_Component	Marginal	2	1	3	258.7	NA	0.000243818	0.00016657
Cosmopolitan	Washington	Washington	Fragaria x ananassa	Giant_Component	Globally_Central	2	3	5	680.067	NA	0.000712606	0.000165376
Cosmopolitan	PI675459	Flavorfest	Fragaria x ananassa	Giant_Component	Marginal	2	0	2	0	NA	6.6506e-05	0.000164573
Cosmopolitan	01-12-15	01-12-15	Fragaria x ananassa	Giant_Component	Locally_Central	0	2	2	0	0.000756949	5.85741e-05	0.000164413
Cosmopolitan	61AP60	61AP60	Fragaria x ananassa	Giant_Component	Locally_Central	2	2	4	100	NA	8.57041e-05	0.000164413
Cosmopolitan	61C117	61C117	Fragaria x ananassa	Giant_Component	Locally_Central	0	2	2	0	0.000756949	5.85741e-05	0.000164413
Cosmopolitan	88-011-30	88-011-30	Fragaria x ananassa	Giant_Component	Locally_Central	0	2	2	0	0.000756949	5.85741e-05	0.000164413
Cosmopolitan	89.384.20	89.384.20	Fragaria x ananassa	Giant_Component	Locally_Central	2	2	4	229.654	NA	7.01212e-05	0.000164413
Cosmopolitan	91C248P006	Diamante	Fragaria x ananassa	Giant_Component	Locally_Central	2	2	4	250	NA	6.88432e-05	0.000164413
Cosmopolitan	A.F._Barron	A.F._Barron	Fragaria x ananassa	Giant_Component	Marginal	2	0	2	0	NA	5.85741e-05	0.000164413
Cosmopolitan	A20-17	A20-17	Fragaria x ananassa	Halo	Locally_Central	0	2	2	0	0.000756949	5.85741e-05	0.000164413
Cosmopolitan	AAC_Lila	AAC_Lila	Fragaria x ananassa	Giant_Component	Broker	2	1	3	491.592	NA	6.83313e-05	0.000164413
Cosmopolitan	Abington_Blush	Abington_Blush	Fragaria x ananassa	Giant_Component	Marginal	1	0	1	0	NA	5.85741e-05	0.000164413
Cosmopolitan	Abundance_1905	Abundance_1905	Fragaria x ananassa	Giant_Component	Marginal	2	0	2	0	NA	5.85741e-05	0.000164413
Cosmopolitan	Abundance_1908	Abundance_1908	Fragaria x ananassa	Giant_Component	Marginal	2	0	2	0	NA	5.85741e-05	0.000164413
Cosmopolitan	Abundance_1922	Abundance_1922	Fragaria x ananassa	Giant_Component	Marginal	2	0	2	0	NA	6.58959e-05	0.000164413
Cosmopolitan	Acme	Acme	Fragaria x ananassa	Giant_Component	Marginal	1	0	1	0	NA	5.85741e-05	0.000164413
Cosmopolitan	Addison	Addison	Fragaria x ananassa	Giant_Component	Marginal	2	0	2	0	NA	5.85741e-05	0.000164413
Cosmopolitan	Adirondack	Adirondack	Fragaria x ananassa	Giant_Component	Marginal	2	0	2	0	NA	7.51625e-05	0.000164413
Cosmopolitan	Adria	Adria	Fragaria x ananassa	Giant_Component	Marginal	2	0	2	0	NA	6.53614e-05	0.000164413
Cosmopolitan	Adriana	Adriana	Fragaria x ananassa	Halo	Marginal	0	0	0	0	0	5.85741e-05	0.000164413
Cosmopolitan	Advance	Advance	Fragaria x ananassa	Giant_Component	Marginal	2	0	2	0	NA	6.58959e-05	0.000164413
Cosmopolitan	Aga_1960	Aga_1960	Fragaria x ananassa	Giant_Component	Marginal	2	0	2	0	NA	5.88887e-05	0.000164413
Cosmopolitan	Aga_2002	Aga_2002	Fragaria x ananassa	Giant_Component	Marginal	2	0	2	0	NA	6.36334e-05	0.000164413
Cosmopolitan	Agassiz	Agassiz	Fragaria x ananassa	Giant_Component	Marginal	2	0	2	0	NA	5.85741e-05	0.000164413
Cosmopolitan	Agoura	Agoura	Fragaria x ananassa	Giant_Component	Locally_Central	2	2	4	8	NA	5.85741e-05	0.000164413
Cosmopolitan	Aguedilla	Aguedilla	Fragaria x ananassa	Giant_Component	Marginal	2	0	2	0	NA	6.26763e-05	0.000164413
Cosmopolitan	Aires	Aires	Fragaria x ananassa	Halo	Marginal	2	0	2	0	NA	5.85741e-05	0.000164413
Cosmopolitan	Aishkum	Aishkum	Fragaria x ananassa	Giant_Component	Marginal	2	0	2	0	NA	5.88387e-05	0.000164413
Cosmopolitan	Akasyanomitsuko	Akasyanomitsuko	Fragaria x ananassa	Giant_Component	Marginal	2	0	2	0	NA	7.3167e-05	0.000164413
Cosmopolitan	Akcent	Akcent	Fragaria x ananassa	Giant_Component	Marginal	2	0	2	0	NA	6.65209e-05	0.000164413
Cosmopolitan	Akita_Berry	Akita_Berry	Fragaria x ananassa	Giant_Component	Marginal	1	0	1	0	NA	5.85741e-05	0.000164413
Cosmopolitan	Alamo	Alamo	Fragaria x ananassa	Giant_Component	Marginal	2	0	2	0	NA	5.86885e-05	0.000164413
Cosmopolitan	Alaska	Alaska	Fragaria x ananassa	Giant_Component	Marginal	2	0	2	0	NA	5.85741e-05	0.000164413
Cosmopolitan	Alcatraz	Alcatraz	Fragaria x ananassa	Giant_Component	Marginal	2	0	2	0	NA	6.47519e-05	0.000164413
Cosmopolitan	Alden	Alden	Fragaria x ananassa	Giant_Component	Marginal	2	0	2	0	NA	5.85741e-05	0.000164413
Cosmopolitan	Alessandra	Alessandra	Fragaria x ananassa	Giant_Component	Marginal	2	0	2	0	NA	5.8729e-05	0.000164413
Cosmopolitan	Alfa	Alfa	Fragaria x ananassa	Giant_Component	Marginal	2	0	2	0	NA	5.96604e-05	0.000164413
Cosmopolitan	Alfa_Centauri	Alfa_Centauri	Fragaria x ananassa	Giant_Component	Marginal	2	0	2	0	NA	5.97507e-05	0.000164413
Cosmopolitan	Alinta	Alinta	Fragaria x ananassa	Giant_Component	Marginal	2	0	2	0	NA	5.85741e-05	0.000164413
Cosmopolitan	Alioth	Alioth	Fragaria x ananassa	Giant_Component	Marginal	2	0	2	0	NA	6.40598e-05	0.000164413
Cosmopolitan	Alisal	Alisal	Fragaria x ananassa	Giant_Component	Marginal	2	0	2	0	NA	5.85741e-05	0.000164413
Cosmopolitan	All_Season	All_Season	Fragaria x ananassa	Giant_Component	Marginal	1	0	1	0	NA	5.85741e-05	0.000164413
Cosmopolitan	Allegro	Allegro	Fragaria x ananassa	Halo	Marginal	2	0	2	0	NA	5.85741e-05	0.000164413
Cosmopolitan	Almo	Almo	Fragaria x ananassa	Giant_Component	Marginal	2	0	2	0	NA	6.68111e-05	0.000164413
Cosmopolitan	Alpha	Alpha	Fragaria x ananassa	Giant_Component	Marginal	2	0	2	0	NA	5.85741e-05	0.000164413
Cosmopolitan	Alta_Vista	Alta_Vista	Fragaria x ananassa	Giant_Component	Marginal	2	0	2	0	NA	5.85741e-05	0.000164413
Cosmopolitan	Altess	Altess	Fragaria x ananassa	Halo	Marginal	0	0	0	0	0	5.85741e-05	0.000164413
Cosmopolitan	Alvin	Alvin	Fragaria x ananassa	Giant_Component	Marginal	2	0	2	0	NA	7.15302e-05	0.000164413
Cosmopolitan	Amanda	Amanda	Fragaria x ananassa	Giant_Component	Marginal	2	0	2	0	NA	5.85741e-05	0.000164413
Cosmopolitan	Amandine	Amandine	Fragaria x ananassa	Giant_Component	Marginal	2	0	2	0	NA	5.85741e-05	0.000164413
Cosmopolitan	Amarant	Amarant	Fragaria x ananassa	Giant_Component	Marginal	2	0	2	0	NA	6.39297e-05	0.000164413
Cosmopolitan	Amaterasu	Amaterasu	Fragaria x ananassa	Giant_Component	Marginal	2	0	2	0	NA	5.85741e-05	0.000164413
Cosmopolitan	Amazing	Amazing	Fragaria x ananassa	Giant_Component	Marginal	2	0	2	0	NA	6.26493e-05	0.000164413
Cosmopolitan	Ambrozja	Ambrozja	Fragaria x ananassa	Giant_Component	Marginal	2	0	2	0	NA	6.48839e-05	0.000164413
Cosmopolitan	Amelia	Amelia	Fragaria x ananassa	Halo	Marginal	2	0	2	0	NA	5.85741e-05	0.000164413
Cosmopolitan	America_1892	America_1892	Fragaria x ananassa	Halo	Marginal	1	0	1	0	NA	5.85741e-05	0.000164413
Cosmopolitan	America_1909	America_1909	Fragaria x ananassa	Giant_Component	Marginal	2	0	2	0	NA	5.88029e-05	0.000164413
Cosmopolitan	American_Queen	American_Queen	Fragaria x ananassa	Halo	Marginal	1	0	1	0	NA	5.85741e-05	0.000164413
Cosmopolitan	American_Sweetheart	American_Sweetheart	Fragaria x ananassa	Giant_Component	Marginal	1	0	1	0	NA	5.85741e-05	0.000164413
Cosmopolitan	Amiga	Amiga	Fragaria x ananassa	Giant_Component	Marginal	2	0	2	0	NA	6.26763e-05	0.000164413
Cosmopolitan	Amulet	Amulet	Fragaria x ananassa	Giant_Component	Marginal	2	0	2	0	NA	6.80267e-05	0.000164413
Cosmopolitan	Amy	Amy	Fragaria x ananassa	Halo	Marginal	0	0	0	0	0	5.85741e-05	0.000164413
Cosmopolitan	Anabelle	Anabelle	Fragaria x ananassa	Giant_Component	Marginal	2	0	2	0	NA	6.13742e-05	0.000164413
Cosmopolitan	Anacapa	Anacapa	Fragaria x ananassa	Giant_Component	Marginal	2	0	2	0	NA	5.85741e-05	0.000164413
Cosmopolitan	Anais	Anais	Fragaria x ananassa	Giant_Component	Marginal	2	0	2	0	NA	6.13742e-05	0.000164413
Cosmopolitan	Andana	Andana	Fragaria x ananassa	Giant_Component	Marginal	2	0	2	0	NA	7.0262e-05	0.000164413
Cosmopolitan	Andrea	Andrea	Fragaria x ananassa	Halo	Marginal	0	0	0	0	0	5.85741e-05	0.000164413
Cosmopolitan	Angelina	Angelina	Fragaria x ananassa	Giant_Component	Marginal	2	0	2	0	NA	6.00879e-05	0.000164413
Cosmopolitan	Angola	Angola	Fragaria x ananassa	Giant_Component	Marginal	2	0	2	0	NA	5.85741e-05	0.000164413
Cosmopolitan	Anita	Anita	Fragaria x ananassa	Giant_Component	Marginal	2	0	2	0	NA	5.85741e-05	0.000164413
Cosmopolitan	Anitabis	Anitabis	Fragaria x ananassa	Giant_Component	Marginal	2	0	2	0	NA	5.85741e-05	0.000164413
Cosmopolitan	Anna_Kennedy	Anna_Kennedy	Fragaria x ananassa	Giant_Component	Marginal	1	0	1	0	NA	5.85741e-05	0.000164413
Cosmopolitan	Annie_Hubach	Annie_Hubach	Fragaria x ananassa	Giant_Component	Marginal	2	0	2	0	NA	5.85741e-05	0.000164413
Cosmopolitan	Antea	Antea	Fragaria x ananassa	Giant_Component	Marginal	2	0	2	0	NA	5.85741e-05	0.000164413
Cosmopolitan	Anther	Anther	Fragaria x ananassa	Giant_Component	Marginal	2	0	2	0	NA	6.91776e-05	0.000164413
Cosmopolitan	Antilla	Antilla	Fragaria x ananassa	Halo	Marginal	0	0	0	0	0	5.85741e-05	0.000164413
Cosmopolitan	Aprica	Aprica	Fragaria x ananassa	Halo	Marginal	0	0	0	0	0	5.85741e-05	0.000164413
Cosmopolitan	Arabella	Arabella	Fragaria x ananassa	Giant_Component	Marginal	2	0	2	0	NA	5.85741e-05	0.000164413
Cosmopolitan	Arapahoe	Arapahoe	Fragaria x ananassa	Giant_Component	Marginal	2	1	3	34.5	NA	6.40711e-05	0.000164413
Cosmopolitan	Arcade	Arcade	Fragaria x ananassa	Giant_Component	Marginal	2	0	2	0	NA	5.85741e-05	0.000164413
Cosmopolitan	Arch_Red	Arch_Red	Fragaria x ananassa	Giant_Component	Marginal	2	0	2	0	NA	6.59898e-05	0.000164413
Cosmopolitan	Archer	Archer	Fragaria x ananassa	Giant_Component	Marginal	2	0	2	0	NA	5.85741e-05	0.000164413
Cosmopolitan	Arena	Arena	Fragaria x ananassa	Giant_Component	Marginal	2	0	2	0	NA	5.85741e-05	0.000164413
Cosmopolitan	Argentera	Argentera	Fragaria x ananassa	Giant_Component	Marginal	2	0	2	0	NA	5.9607e-05	0.000164413
Cosmopolitan	Argyle	Argyle	Fragaria x ananassa	Giant_Component	Marginal	2	0	2	0	NA	5.85741e-05	0.000164413
Cosmopolitan	Ariadna	Ariadna	Fragaria x ananassa	Halo	Marginal	0	0	0	0	0	5.85741e-05	0.000164413
Cosmopolitan	Ariel	Ariel	Fragaria x ananassa	Giant_Component	Locally_Central	0	4	4	0	0	5.85741e-05	0.000164413
Cosmopolitan	ARK_5309	ARK_5309	Fragaria x ananassa	Halo	Marginal	0	1	1	0	0	5.85741e-05	0.000164413
Cosmopolitan	ARK_5350	ARK_5350	Fragaria x ananassa	Halo	Marginal	0	1	1	0	0	5.85741e-05	0.000164413
Cosmopolitan	ARK_5362	ARK_5362	Fragaria x ananassa	Halo	Marginal	0	1	1	0	0	5.85741e-05	0.000164413
Cosmopolitan	ARK_5409	ARK_5409	Fragaria x ananassa	Halo	Marginal	0	1	1	0	0	5.85741e-05	0.000164413
Cosmopolitan	ARK_5465	ARK_5465	Fragaria x ananassa	Halo	Marginal	0	1	1	0	0	5.85741e-05	0.000164413
Cosmopolitan	ARK_5474	ARK_5474	Fragaria x ananassa	Giant_Component	Locally_Central	0	3	3	0	0	5.85741e-05	0.000164413
Cosmopolitan	Arkansas_Wonder	Arkansas_Wonder	Fragaria x ananassa	Halo	Marginal	0	0	0	0	0	5.85741e-05	0.000164413
Cosmopolitan	Armelle	Armelle	Fragaria x ananassa	Halo	Marginal	0	0	0	0	0	5.85741e-05	0.000164413
Cosmopolitan	Arnold_Pride	Arnold_Pride	Fragaria x ananassa	Giant_Component	Marginal	2	0	2	0	NA	5.85741e-05	0.000164413
Cosmopolitan	Aromatic_Crimson	Aromatic_Crimson	Fragaria x ananassa	Giant_Component	Marginal	1	0	1	0	NA	5.85741e-05	0.000164413
Cosmopolitan	Arosa	Arosa	Fragaria x ananassa	Giant_Component	Marginal	2	1	3	138	NA	5.93859e-05	0.000164413
Cosmopolitan	Arrow	Arrow	Fragaria x ananassa	Giant_Component	Marginal	1	0	1	0	NA	5.85741e-05	0.000164413
Cosmopolitan	Arrowhead	Arrowhead	Fragaria x ananassa	Giant_Component	Marginal	2	0	2	0	NA	7.5377e-05	0.000164413
Cosmopolitan	Ashton	Ashton	Fragaria x ananassa	Giant_Component	Marginal	2	0	2	0	NA	5.85741e-05	0.000164413
Cosmopolitan	Asia	Asia	Fragaria x ananassa	Halo	Locally_Central	2	2	4	4	NA	5.85741e-05	0.000164413
Cosmopolitan	Astra	Astra	Fragaria x ananassa	Giant_Component	Marginal	2	1	3	98	NA	6.25778e-05	0.000164413
Cosmopolitan	Asuka_Ruby	Asuka_Ruby	Fragaria x ananassa	Giant_Component	Marginal	2	1	3	100	NA	6.56341e-05	0.000164413
Cosmopolitan	Athena	Athena	Fragaria x ananassa	Giant_Component	Marginal	2	0	2	0	NA	5.85741e-05	0.000164413
Cosmopolitan	Athens	Athens	Fragaria x ananassa	Giant_Component	Marginal	2	0	2	0	NA	5.85741e-05	0.000164413
Cosmopolitan	Atlantis	Atlantis	Fragaria x ananassa	Giant_Component	Marginal	2	1	3	306	NA	5.85741e-05	0.000164413
Cosmopolitan	AU_2010-095	AU_2010-095	Fragaria x ananassa	Giant_Component	Locally_Central	0	2	2	0	0.000756949	5.85741e-05	0.000164413
Cosmopolitan	Auburn	Auburn	Fragaria x ananassa	Giant_Component	Marginal	1	0	1	0	NA	5.85741e-05	0.000164413
Cosmopolitan	Aurora_1907	Aurora_1907	Fragaria x ananassa	Giant_Component	Marginal	1	0	1	0	NA	5.85741e-05	0.000164413
Cosmopolitan	Austin_Shaker	Austin_Shaker	Fragaria x ananassa	Giant_Component	Marginal	1	0	1	0	NA	5.85741e-05	0.000164413
Cosmopolitan	Autumn_Bell	Autumn_Bell	Fragaria x ananassa	Giant_Component	Marginal	2	0	2	0	NA	5.85741e-05	0.000164413
Cosmopolitan	Autumn_King	Autumn_King	Fragaria x ananassa	Giant_Component	Marginal	2	0	2	0	NA	5.85741e-05	0.000164413
Cosmopolitan	Autumn_Scarlet	Autumn_Scarlet	Fragaria x ananassa	Halo	Marginal	2	0	2	0	NA	5.85741e-05	0.000164413
Cosmopolitan	Autumn_Surprise	Autumn_Surprise	Fragaria x ananassa	Giant_Component	Marginal	2	0	2	0	NA	6.26493e-05	0.000164413
Cosmopolitan	Ava	Ava	Fragaria x ananassa	Halo	Marginal	0	0	0	0	0	5.85741e-05	0.000164413
Cosmopolitan	Avablush	Avablush	Fragaria x ananassa	Halo	Marginal	0	0	0	0	0	5.85741e-05	0.000164413
Cosmopolitan	Avajoy	Avajoy	Fragaria x ananassa	Halo	Marginal	0	0	0	0	0	5.85741e-05	0.000164413
Cosmopolitan	Avalon	Avalon	Fragaria x ananassa	Giant_Component	Marginal	2	0	2	0	NA	5.85741e-05	0.000164413
Cosmopolitan	Avamaria	Avamaria	Fragaria x ananassa	Halo	Marginal	0	0	0	0	0	5.85741e-05	0.000164413
Cosmopolitan	Avanta	Avanta	Fragaria x ananassa	Giant_Component	Marginal	2	0	2	0	NA	6.27516e-05	0.000164413
Cosmopolitan	Avarosa	Avarosa	Fragaria x ananassa	Halo	Marginal	0	0	0	0	0	5.85741e-05	0.000164413
Cosmopolitan	Avastar	Avastar	Fragaria x ananassa	Halo	Marginal	0	0	0	0	0	5.85741e-05	0.000164413
Cosmopolitan	Avasurprise	Avasurprise	Fragaria x ananassa	Halo	Marginal	0	0	0	0	0	5.85741e-05	0.000164413
Cosmopolitan	Avila	Avila	Fragaria x ananassa	Giant_Component	Marginal	2	0	2	0	NA	5.85741e-05	0.000164413
Cosmopolitan	Awaitumo	Awaitumo	Fragaria x ananassa	Halo	Marginal	0	0	0	0	0	5.85741e-05	0.000164413
Cosmopolitan	Awanatsuka	Awanatsuka	Fragaria x ananassa	Halo	Marginal	2	0	2	0	NA	5.85741e-05	0.000164413
Cosmopolitan	Babette	Babette	Fragaria x ananassa	Giant_Component	Marginal	2	0	2	0	NA	6.22302e-05	0.000164413
Cosmopolitan	Babylon	Babylon	Fragaria x ananassa	Giant_Component	Marginal	1	0	1	0	NA	5.85741e-05	0.000164413
Cosmopolitan	Banana	Banana	Fragaria x ananassa	Giant_Component	Marginal	1	0	1	0	NA	5.85741e-05	0.000164413
Cosmopolitan	Banquet	Banquet	Fragaria x ananassa	Giant_Component	Marginal	2	0	2	0	NA	5.85741e-05	0.000164413
Cosmopolitan	Baotong	Baotong	Fragaria x ananassa	Giant_Component	Marginal	2	0	2	0	NA	5.85741e-05	0.000164413
Cosmopolitan	Barak	Barak	Fragaria x ananassa	Giant_Component	Marginal	2	0	2	0	NA	5.85741e-05	0.000164413
Cosmopolitan	Barrymore	Barrymore	Fragaria x ananassa	Giant_Component	Marginal	1	0	1	0	NA	5.85741e-05	0.000164413
Cosmopolitan	Battenburg	Battenburg	Fragaria x ananassa	Giant_Component	Marginal	2	0	2	0	NA	5.85741e-05	0.000164413
Cosmopolitan	Beacon	Beacon	Fragaria x ananassa	Giant_Component	Marginal	2	1	3	40	NA	0.000184875	0.000164413
Cosmopolitan	Beaderarena_Jr.	Beaderarena_Jr.	Fragaria x ananassa	Giant_Component	Marginal	1	0	1	0	NA	5.85741e-05	0.000164413
Cosmopolitan	Beal	Beal	Fragaria x ananassa	Giant_Component	Marginal	1	0	1	0	NA	5.85741e-05	0.000164413
Cosmopolitan	Beaver_Sweet	Beaver_Sweet	Fragaria x ananassa	Giant_Component	Marginal	2	0	2	0	NA	5.85741e-05	0.000164413
Cosmopolitan	Beecher	Beecher	Fragaria x ananassa	Giant_Component	Marginal	2	0	2	0	NA	5.85741e-05	0.000164413
Cosmopolitan	Belle_de_Bordelaise	Belle_de_Bordelaise	Unknown	Giant_Component	Marginal	2	0	2	0	NA	5.85741e-05	0.000164413
Cosmopolitan	Belle_et_Bonne	Belle_et_Bonne	Fragaria x ananassa	Giant_Component	Marginal	2	0	2	0	NA	5.85741e-05	0.000164413
Cosmopolitan	Beltran	Beltran	Fragaria x ananassa	Halo	Marginal	0	0	0	0	0	5.85741e-05	0.000164413
Cosmopolitan	Benancie	Benancie	Fragaria x ananassa	Giant_Component	Marginal	2	0	2	0	NA	6.32646e-05	0.000164413
Cosmopolitan	Beniatago	Beniatago	Fragaria x ananassa	Giant_Component	Marginal	2	0	2	0	NA	7.02391e-05	0.000164413
Cosmopolitan	Benihibari	Benihibari	Fragaria x ananassa	Giant_Component	Marginal	2	0	2	0	NA	5.85741e-05	0.000164413
Cosmopolitan	Beniyutaka	Beniyutaka	Fragaria x ananassa	Giant_Component	Marginal	2	0	2	0	NA	7.17618e-05	0.000164413
Cosmopolitan	Benoy	Benoy	Fragaria x ananassa	Giant_Component	Marginal	2	0	2	0	NA	5.85741e-05	0.000164413
Cosmopolitan	Berlin_1892	Berlin_1892	Fragaria x ananassa	Giant_Component	Marginal	1	0	1	0	NA	5.85741e-05	0.000164413
Cosmopolitan	Berlin_1902	Berlin_1902	Fragaria x ananassa	Giant_Component	Marginal	1	0	1	0	NA	5.85741e-05	0.000164413
Cosmopolitan	Berri_Supreme	Berri_Supreme	Fragaria x ananassa	Giant_Component	Marginal	1	1	2	220	NA	0.000307689	0.000164413
Cosmopolitan	Berry_Star	Berry_Star	Fragaria x ananassa	Giant_Component	Marginal	2	0	2	0	NA	5.85741e-05	0.000164413
Cosmopolitan	Besos	Besos	Fragaria x ananassa	Halo	Marginal	0	0	0	0	0	5.85741e-05	0.000164413
Cosmopolitan	Bessie_1891	Bessie_1891	Fragaria x ananassa	Giant_Component	Marginal	1	0	1	0	NA	5.85741e-05	0.000164413
Cosmopolitan	Bessie_1899	Bessie_1899	Fragaria x ananassa	Giant_Component	Marginal	2	0	2	0	NA	6.08622e-05	0.000164413
Cosmopolitan	Bethel	Bethel	Fragaria x ananassa	Giant_Component	Marginal	2	0	2	0	NA	5.85741e-05	0.000164413
Cosmopolitan	Betty	Betty	Fragaria x ananassa	Giant_Component	Marginal	2	0	2	0	NA	5.85741e-05	0.000164413
Cosmopolitan	Beverly	Beverly	Fragaria x ananassa	Giant_Component	Marginal	1	0	1	0	NA	5.85741e-05	0.000164413
Cosmopolitan	BG-1445	BG-1445	Fragaria x ananassa	Giant_Component	Locally_Central	0	2	2	0	0.000756949	5.85741e-05	0.000164413
Cosmopolitan	BG-219.068	BG-219.068	Fragaria x ananassa	Giant_Component	Locally_Central	0	4	4	0	0.000756949	5.85741e-05	0.000164413
Cosmopolitan	Big_Bob	Big_Bob	Fragaria x ananassa	Giant_Component	Marginal	2	0	2	0	NA	6.08622e-05	0.000164413
Cosmopolitan	Big_Bob_1885	Big_Bob_1885	Fragaria x ananassa	Giant_Component	Marginal	2	0	2	0	NA	6.08622e-05	0.000164413
Cosmopolitan	Big_Bob's_Baby	Big_Bob's_Baby	Fragaria x ananassa	Giant_Component	Marginal	1	0	1	0	NA	5.85741e-05	0.000164413
Cosmopolitan	Big_Rock	Big_Rock	Fragaria x ananassa	Giant_Component	Marginal	2	0	2	0	NA	5.85741e-05	0.000164413
Cosmopolitan	Bihla	Bihla	Fragaria x ananassa	Giant_Component	Marginal	2	0	2	0	NA	7.54363e-05	0.000164413
Cosmopolitan	Biliana	Biliana	Fragaria x ananassa	Giant_Component	Marginal	2	0	2	0	NA	5.85741e-05	0.000164413
Cosmopolitan	Bird	Bird	Fragaria x ananassa	Giant_Component	Marginal	2	0	2	0	NA	5.85741e-05	0.000164413
Cosmopolitan	Bisalta	Bisalta	Fragaria x ananassa	Giant_Component	Marginal	2	0	2	0	NA	7.07335e-05	0.000164413
Cosmopolitan	Biscayne	Biscayne	Fragaria x ananassa	Giant_Component	Marginal	2	0	2	0	NA	5.85741e-05	0.000164413
Cosmopolitan	Bisel	Bisel	Fragaria x ananassa	Giant_Component	Marginal	1	0	1	0	NA	5.85741e-05	0.000164413
Cosmopolitan	Bishop's_Seedling_Scarlet	Bishop's_Seedling_Scarlet	Fragaria x ananassa	Giant_Component	Marginal	1	0	1	0	NA	5.85741e-05	0.000164413
Cosmopolitan	Bismarck	Bismarck	Fragaria x ananassa	Giant_Component	Broker	2	1	3	2048.92	NA	0.00116086	0.000164413
Cosmopolitan	Black_Lee	Black_Lee	Fragaria x ananassa	Giant_Component	Marginal	2	0	2	0	NA	5.85741e-05	0.000164413
Cosmopolitan	Blaine	Blaine	Fragaria x ananassa	Giant_Component	Marginal	2	0	2	0	NA	5.85741e-05	0.000164413
Cosmopolitan	Blaze	Blaze	Fragaria x ananassa	Giant_Component	Marginal	2	0	2	0	NA	6.26068e-05	0.000164413
Cosmopolitan	Blink	Blink	Fragaria x ananassa	Giant_Component	Marginal	2	0	2	0	NA	5.86617e-05	0.000164413
Cosmopolitan	Blonde	Blonde	Fragaria x ananassa	Giant_Component	Marginal	1	0	1	0	NA	5.85741e-05	0.000164413
Cosmopolitan	Blooel	Blooel	Fragaria x ananassa	Halo	Marginal	0	0	0	0	0	5.85741e-05	0.000164413
Cosmopolitan	Bob	Bob	Fragaria x ananassa	Halo	Marginal	2	0	2	0	NA	5.85741e-05	0.000164413
Cosmopolitan	Bomba_1885	Bomba_1885	Fragaria x ananassa	Halo	Marginal	1	0	1	0	NA	5.85741e-05	0.000164413
Cosmopolitan	Bonaire	Bonaire	Fragaria x ananassa	Giant_Component	Marginal	2	1	3	14	NA	5.85741e-05	0.000164413
Cosmopolitan	Bonmir_Landovsky	Bonmir_Landovsky	Fragaria x ananassa	Giant_Component	Marginal	2	0	2	0	NA	5.85741e-05	0.000164413
Cosmopolitan	Boquet	Boquet	Fragaria x ananassa	Giant_Component	Marginal	2	0	2	0	NA	5.85741e-05	0.000164413
Cosmopolitan	Borden	Borden	Fragaria x ananassa	Giant_Component	Marginal	2	0	2	0	NA	5.85741e-05	0.000164413
Cosmopolitan	Borovitskaya	Borovitskaya	Fragaria x ananassa	Giant_Component	Marginal	2	0	2	0	NA	6.05181e-05	0.000164413
Cosmopolitan	Boudinot	Boudinot	Fragaria x ananassa	Giant_Component	Marginal	1	0	1	0	NA	5.85741e-05	0.000164413
Cosmopolitan	Bouncer	Bouncer	Fragaria x ananassa	Giant_Component	Marginal	2	0	2	0	NA	5.85741e-05	0.000164413
Cosmopolitan	Bountiful_1900	Bountiful_1900	Fragaria x ananassa	Giant_Component	Marginal	2	0	2	0	NA	5.85741e-05	0.000164413
Cosmopolitan	Bountiful_1958	Bountiful_1958	Fragaria x ananassa	Giant_Component	Marginal	2	0	2	0	NA	5.85741e-05	0.000164413
Cosmopolitan	Bowa	Bowa	Fragaria x ananassa	Giant_Component	Locally_Central	0	3	3	0	0.00104081	0.000139114	0.000164413
Cosmopolitan	Boynton	Boynton	Fragaria x ananassa	Giant_Component	Marginal	2	0	2	0	NA	5.85741e-05	0.000164413
Cosmopolitan	Bradley	Bradley	Fragaria x ananassa	Giant_Component	Marginal	2	0	2	0	NA	7.32177e-05	0.000164413
Cosmopolitan	Bright_Ida	Bright_Ida	Fragaria x ananassa	Giant_Component	Marginal	2	0	2	0	NA	5.85741e-05	0.000164413
Cosmopolitan	Brighteyes	Brighteyes	Fragaria x ananassa	Giant_Component	Marginal	2	0	2	0	NA	5.85741e-05	0.000164413
Cosmopolitan	Brightmore	Brightmore	Fragaria x ananassa	Giant_Component	Globally_Central	2	2	4	1436.79	NA	0.000380912	0.000164413
Cosmopolitan	Brilla	Brilla	Fragaria x ananassa	Giant_Component	Marginal	2	0	2	0	NA	6.5344e-05	0.000164413
Cosmopolitan	Brilliance	Brilliance	Fragaria x ananassa	Giant_Component	Marginal	2	0	2	0	NA	6.78768e-05	0.000164413
Cosmopolitan	Brilliant_1845	Brilliant_1845	Fragaria x ananassa	Halo	Marginal	1	0	1	0	NA	5.85741e-05	0.000164413
Cosmopolitan	Brilliant_1906	Brilliant_1906	Fragaria x ananassa	Giant_Component	Marginal	1	0	1	0	NA	5.85741e-05	0.000164413
Cosmopolitan	Bristol	Bristol	Fragaria x ananassa	Giant_Component	Marginal	2	0	2	0	NA	5.85741e-05	0.000164413
Cosmopolitan	Brooklyn_Scarlet	Brooklyn_Scarlet	Fragaria x ananassa	Giant_Component	Marginal	1	0	1	0	NA	5.85741e-05	0.000164413
Cosmopolitan	Brownie	Brownie	Fragaria x ananassa	Giant_Component	Marginal	2	0	2	0	NA	6.58959e-05	0.000164413
Cosmopolitan	Brune's_Marvel	Brune's_Marvel	Fragaria x ananassa	Giant_Component	Marginal	2	0	2	0	NA	6.3539e-05	0.000164413
Cosmopolitan	Bryan's_Satisfaction	Bryan's_Satisfaction	Fragaria x ananassa	Giant_Component	Marginal	2	0	2	0	NA	5.85741e-05	0.000164413
Cosmopolitan	Bryant	Bryant	Fragaria x ananassa	Giant_Component	Marginal	1	0	1	0	NA	5.85741e-05	0.000164413
Cosmopolitan	Buba	Buba	Fragaria x ananassa	Giant_Component	Marginal	2	0	2	0	NA	7.19578e-05	0.000164413
Cosmopolitan	Buckbee	Buckbee	Fragaria x ananassa	Giant_Component	Marginal	1	0	1	0	NA	5.85741e-05	0.000164413
Cosmopolitan	Buddy	Buddy	Fragaria x ananassa	Giant_Component	Marginal	2	0	2	0	NA	5.85741e-05	0.000164413
Cosmopolitan	Bull_Moose	Bull_Moose	Fragaria x ananassa	Giant_Component	Marginal	2	0	2	0	NA	5.85741e-05	0.000164413
Cosmopolitan	Burbank's_Exquisite	Burbank's_Exquisite	Fragaria x ananassa	Giant_Component	Marginal	2	0	2	0	NA	5.85741e-05	0.000164413
Cosmopolitan	Burbank's_Robusta	Burbank's_Robusta	Fragaria x ananassa	Giant_Component	Marginal	1	0	1	0	NA	5.85741e-05	0.000164413
Cosmopolitan	Burlington	Burlington	Fragaria x ananassa	Giant_Component	Marginal	2	0	2	0	NA	6.46788e-05	0.000164413
Cosmopolitan	Buster	Buster	Fragaria x ananassa	Giant_Component	Marginal	2	0	2	0	NA	5.85741e-05	0.000164413
Cosmopolitan	Bylinnaya	Bylinnaya	Fragaria x ananassa	Halo	Marginal	0	0	0	0	0	5.85741e-05	0.000164413
Cosmopolitan	Cacak_45/7	Cacak_45/7	Fragaria x ananassa	Giant_Component	Locally_Central	2	2	4	86	NA	5.97815e-05	0.000164413
Cosmopolitan	Cacanska_Krupna	Cacanska_Krupna	Fragaria x ananassa	Giant_Component	Marginal	2	0	2	0	NA	5.91426e-05	0.000164413
Cosmopolitan	Cacanska_Rana	Cacanska_Rana	Fragaria x ananassa	Giant_Component	Marginal	2	0	2	0	NA	5.91426e-05	0.000164413
Cosmopolitan	Caledonia	Caledonia	Fragaria x ananassa	Giant_Component	Marginal	2	0	2	0	NA	5.85741e-05	0.000164413
Cosmopolitan	California	California	Fragaria x ananassa	Giant_Component	Marginal	2	0	2	0	NA	5.85741e-05	0.000164413
Cosmopolitan	Calinda	Calinda	Fragaria x ananassa	Halo	Marginal	2	0	2	0	NA	5.85741e-05	0.000164413
Cosmopolitan	Camarillo	Camarillo	Fragaria x ananassa	Giant_Component	Locally_Central	2	3	5	12	NA	5.85741e-05	0.000164413
Cosmopolitan	Cambria	Cambria	Fragaria x ananassa	Giant_Component	Marginal	2	0	2	0	NA	5.85741e-05	0.000164413
Cosmopolitan	Cambridge_Aristocrat	Cambridge_Aristocrat	Fragaria x ananassa	Giant_Component	Marginal	2	0	2	0	NA	6.11124e-05	0.000164413
Cosmopolitan	Cambridge_Early_Pine	Cambridge_Early_Pine	Fragaria x ananassa	Giant_Component	Marginal	2	0	2	0	NA	5.85741e-05	0.000164413
Cosmopolitan	Cambridge_Epicure	Cambridge_Epicure	Fragaria x ananassa	Giant_Component	Marginal	2	0	2	0	NA	5.86885e-05	0.000164413
Cosmopolitan	Cambridge_Forerunner	Cambridge_Forerunner	Fragaria x ananassa	Giant_Component	Marginal	2	0	2	0	NA	6.13198e-05	0.000164413
Cosmopolitan	Cambridge_Premier	Cambridge_Premier	Fragaria x ananassa	Giant_Component	Marginal	2	0	2	0	NA	6.24558e-05	0.000164413
Cosmopolitan	Cambridge_Prizewinner	Cambridge_Prizewinner	Fragaria x ananassa	Giant_Component	Marginal	2	0	2	0	NA	6.3236e-05	0.000164413
Cosmopolitan	Cambridge_Regent	Cambridge_Regent	Fragaria x ananassa	Giant_Component	Marginal	2	0	2	0	NA	5.93392e-05	0.000164413
Cosmopolitan	Cambridge_Rival	Cambridge_Rival	Fragaria x ananassa	Giant_Component	Marginal	2	0	2	0	NA	6.84843e-05	0.000164413
Cosmopolitan	Cambridge_Sentry	Cambridge_Sentry	Fragaria x ananassa	Giant_Component	Marginal	2	0	2	0	NA	6.84843e-05	0.000164413
Cosmopolitan	Camden	Camden	Fragaria x ananassa	Giant_Component	Marginal	2	0	2	0	NA	5.85741e-05	0.000164413
Cosmopolitan	Candiss	Candiss	Fragaria x ananassa	Giant_Component	Marginal	2	0	2	0	NA	5.85741e-05	0.000164413
Cosmopolitan	Candy	Candy	Fragaria x ananassa	Halo	Marginal	0	0	0	0	0	5.85741e-05	0.000164413
Cosmopolitan	Candy_Red	Candy_Red	Fragaria x ananassa	Giant_Component	Marginal	2	0	2	0	NA	6.03134e-05	0.000164413
Cosmopolitan	Cantata	Cantata	Fragaria x ananassa	Halo	Marginal	0	0	0	0	0	5.85741e-05	0.000164413
Cosmopolitan	Canterbury	Canterbury	Fragaria x ananassa	Giant_Component	Marginal	2	1	3	127	NA	5.85741e-05	0.000164413
Cosmopolitan	Capella_Super_Herdam	Capella_Super_Herdam	Fragaria x ananassa	Halo	Marginal	0	0	0	0	0	5.85741e-05	0.000164413
Cosmopolitan	Capri	Capri	Fragaria x ananassa	Halo	Marginal	2	0	2	0	NA	5.85741e-05	0.000164413
Cosmopolitan	Capriss	Capriss	Fragaria x ananassa	Giant_Component	Marginal	2	0	2	0	NA	6.30651e-05	0.000164413
Cosmopolitan	Captiva	Captiva	Fragaria x ananassa	Giant_Component	Marginal	2	0	2	0	NA	5.85741e-05	0.000164413
Cosmopolitan	Cardinal_1896	Cardinal_1896	Fragaria x ananassa	Giant_Component	Marginal	1	0	1	0	NA	5.85741e-05	0.000164413
Cosmopolitan	Carezza	Carezza	Fragaria x ananassa	Giant_Component	Marginal	2	0	2	0	NA	5.94929e-05	0.000164413
Cosmopolitan	Carmel_Dandi	Carmel_Dandi	Fragaria x ananassa	Halo	Marginal	0	0	0	0	0	5.85741e-05	0.000164413
Cosmopolitan	Carmela	Carmela	Fragaria x ananassa	Halo	Marginal	2	0	2	0	NA	5.85741e-05	0.000164413
Cosmopolitan	Carmine_Roseberry	Carmine_Roseberry	Fragaria x ananassa	Halo	Marginal	2	0	2	0	NA	5.85741e-05	0.000164413
Cosmopolitan	Carrie_Silvers	Carrie_Silvers	Fragaria x ananassa	Giant_Component	Marginal	2	0	2	0	NA	6.3379e-05	0.000164413
Cosmopolitan	Cartcua	Cartcua	Fragaria x ananassa	Giant_Component	Marginal	2	0	2	0	NA	5.85741e-05	0.000164413
Cosmopolitan	Cartdos	Cartdos	Fragaria x ananassa	Halo	Marginal	0	0	0	0	0	5.85741e-05	0.000164413
Cosmopolitan	Cartres	Cartres	Fragaria x ananassa	Giant_Component	Marginal	2	0	2	0	NA	5.85741e-05	0.000164413
Cosmopolitan	Cassady's_Russell	Cassady's_Russell	Fragaria x ananassa	Giant_Component	Marginal	1	0	1	0	NA	5.85741e-05	0.000164413
Cosmopolitan	Cassandra_1998	Cassandra_1998	Fragaria x ananassa	Giant_Component	Marginal	2	0	2	0	NA	5.85741e-05	0.000164413
Cosmopolitan	Catalina	Catalina	Fragaria x ananassa	Giant_Component	Marginal	2	0	2	0	NA	5.85741e-05	0.000164413
Cosmopolitan	Cato	Cato	Fragaria x ananassa	Giant_Component	Marginal	2	0	2	0	NA	5.85741e-05	0.000164413
Cosmopolitan	Cegnida_Rem	Cegnida_Rem	Fragaria x ananassa	Halo	Marginal	2	0	2	0	NA	5.85741e-05	0.000164413
Cosmopolitan	Cengelköy	Cengelköy	Fragaria x ananassa	Giant_Component	Locally_Central	0	2	2	0	0	5.85741e-05	0.000164413
Cosmopolitan	Cezan	Cezan	Fragaria x ananassa	Halo	Marginal	0	0	0	0	0	5.85741e-05	0.000164413
Cosmopolitan	Chambly	Chambly	Fragaria x ananassa	Giant_Component	Marginal	2	0	2	0	NA	7.16568e-05	0.000164413
Cosmopolitan	Champion_Everbearing	Champion_Everbearing	Fragaria x ananassa	Giant_Component	Marginal	0	1	1	0	0.00269663	0.000267245	0.000164413
Cosmopolitan	Champion_Klondike	Champion_Klondike	Fragaria x ananassa	Giant_Component	Marginal	2	0	2	0	NA	5.94965e-05	0.000164413
Cosmopolitan	Charlene	Charlene	Fragaria x ananassa	Giant_Component	Marginal	2	0	2	0	NA	5.85741e-05	0.000164413
Cosmopolitan	Charles_Favorite	Charles_Favorite	Fragaria x ananassa	Giant_Component	Marginal	1	0	1	0	NA	5.85741e-05	0.000164413
Cosmopolitan	Charles_Newman	Charles_Newman	Fragaria x ananassa	Giant_Component	Marginal	2	0	2	0	NA	6.00042e-05	0.000164413
Cosmopolitan	Charlotte	Charlotte	Fragaria x ananassa	Giant_Component	Marginal	2	0	2	0	NA	5.85741e-05	0.000164413
Cosmopolitan	Chaska	Chaska	Fragaria x ananassa	Giant_Component	Marginal	2	0	2	0	NA	6.26926e-05	0.000164413
Cosmopolitan	Chelsea_Pensioner	Chelsea_Pensioner	Fragaria x ananassa	Halo	Marginal	0	0	0	0	0	5.85741e-05	0.000164413
Cosmopolitan	Chikuma	Chikuma	Fragaria x ananassa	Giant_Component	Marginal	2	0	2	0	NA	5.85741e-05	0.000164413
Cosmopolitan	Chikushi	Chikushi	Fragaria x ananassa	Giant_Component	Marginal	2	0	2	0	NA	5.85741e-05	0.000164413
Cosmopolitan	Chippewa_1912	Chippewa_1912	Fragaria x ananassa	Giant_Component	Marginal	1	0	1	0	NA	5.85741e-05	0.000164413
Cosmopolitan	Chippewa_1920	Chippewa_1920	Fragaria x ananassa	Giant_Component	Marginal	2	0	2	0	NA	5.88387e-05	0.000164413
Cosmopolitan	Chodong	Chodong	Fragaria x ananassa	Giant_Component	Marginal	2	0	2	0	NA	5.94744e-05	0.000164413
Cosmopolitan	Chorlton's_Prolific	Chorlton's_Prolific	Fragaria x ananassa	Giant_Component	Marginal	2	0	2	0	NA	5.85741e-05	0.000164413
Cosmopolitan	Christine	Christine	Fragaria x ananassa	Halo	Marginal	0	0	0	0	0	5.85741e-05	0.000164413
Cosmopolitan	Ciclade	Ciclade	Fragaria x ananassa	Giant_Component	Marginal	2	0	2	0	NA	5.85741e-05	0.000164413
Cosmopolitan	Ciflorette	Ciflorette	Fragaria x ananassa	Giant_Component	Marginal	2	0	2	0	NA	6.14246e-05	0.000164413
Cosmopolitan	Cifrance	Cifrance	Fragaria x ananassa	Giant_Component	Marginal	2	0	2	0	NA	6.47866e-05	0.000164413
Cosmopolitan	Cigaelle	Cigaelle	Fragaria x ananassa	Giant_Component	Marginal	2	0	2	0	NA	6.08731e-05	0.000164413
Cosmopolitan	Cigoulette	Cigoulette	Fragaria x ananassa	Giant_Component	Marginal	2	0	2	0	NA	6.30251e-05	0.000164413
Cosmopolitan	Cijosee	Cijosee	Fragaria x ananassa	Giant_Component	Marginal	2	0	2	0	NA	5.85741e-05	0.000164413
Cosmopolitan	Cilade	Cilade	Fragaria x ananassa	Giant_Component	Marginal	2	0	2	0	NA	6.47866e-05	0.000164413
Cosmopolitan	Ciloe	Ciloe	Fragaria x ananassa	Giant_Component	Marginal	2	0	2	0	NA	6.57947e-05	0.000164413
Cosmopolitan	Cirafine	Cirafine	Fragaria x ananassa	Giant_Component	Marginal	2	0	2	0	NA	5.95766e-05	0.000164413
Cosmopolitan	Cirano	Cirano	Fragaria x ananassa	Giant_Component	Marginal	2	0	2	0	NA	5.98972e-05	0.000164413
Cosmopolitan	Cireine	Cireine	Fragaria x ananassa	Giant_Component	Marginal	2	0	2	0	NA	6.47866e-05	0.000164413
Cosmopolitan	Citation	Citation	Fragaria x ananassa	Giant_Component	Marginal	2	0	2	0	NA	6.07885e-05	0.000164413
Cosmopolitan	Civero	Civero	Fragaria x ananassa	Giant_Component	Marginal	2	1	3	31.1712	NA	6.73077e-05	0.000164413
Cosmopolitan	Clara	Clara	Fragaria x ananassa	Giant_Component	Marginal	2	0	2	0	NA	5.85741e-05	0.000164413
Cosmopolitan	Claribel	Claribel	Fragaria x ananassa	Giant_Component	Broker	2	1	3	333	NA	0.000217612	0.000164413
Cosmopolitan	Clea	Clea	Fragaria x ananassa	Giant_Component	Marginal	2	0	2	0	NA	6.47385e-05	0.000164413
Cosmopolitan	Clermont	Clermont	Fragaria x ananassa	Giant_Component	Marginal	2	0	2	0	NA	5.85741e-05	0.000164413
Cosmopolitan	Clery	Clery	Fragaria x ananassa	Giant_Component	Marginal	2	0	2	0	NA	6.0116e-05	0.000164413
Cosmopolitan	Clonard	Clonard	Fragaria x ananassa	Giant_Component	Marginal	2	0	2	0	NA	5.91176e-05	0.000164413
Cosmopolitan	Clonree	Clonree	Fragaria x ananassa	Giant_Component	Marginal	1	0	1	0	NA	5.85741e-05	0.000164413
Cosmopolitan	Cloud	Cloud	Fragaria x ananassa	Giant_Component	Marginal	2	0	2	0	NA	6.77263e-05	0.000164413
Cosmopolitan	Cobden	Cobden	Fragaria x ananassa	Giant_Component	Marginal	1	0	1	0	NA	5.85741e-05	0.000164413
Cosmopolitan	Cobden_King	Cobden_King	Fragaria x ananassa	Giant_Component	Marginal	1	0	1	0	NA	5.85741e-05	0.000164413
Cosmopolitan	Cockscomb_Scarlet	Cockscomb_Scarlet	Fragaria x ananassa	Giant_Component	Marginal	1	0	1	0	NA	5.85741e-05	0.000164413
Cosmopolitan	Cohansey	Cohansey	Fragaria x ananassa	Giant_Component	Marginal	1	0	1	0	NA	5.85741e-05	0.000164413
Cosmopolitan	Coleman's_President	Coleman's_President	Fragaria x ananassa	Giant_Component	Marginal	1	0	1	0	NA	5.85741e-05	0.000164413
Cosmopolitan	Colima	Colima	Fragaria x ananassa	Giant_Component	Marginal	2	0	2	0	NA	7.60412e-05	0.000164413
Cosmopolitan	Collingwood_1913	Collingwood_1913	Fragaria x ananassa	Giant_Component	Marginal	2	0	2	0	NA	5.85741e-05	0.000164413
Cosmopolitan	Collins	Collins	Fragaria x ananassa	Giant_Component	Marginal	2	0	2	0	NA	5.85741e-05	0.000164413
Cosmopolitan	Collosus	Collosus	Fragaria x ananassa	Giant_Component	Marginal	1	0	1	0	NA	5.85741e-05	0.000164413
Cosmopolitan	Colonel_Cheney	Colonel_Cheney	Fragaria x ananassa	Giant_Component	Marginal	2	0	2	0	NA	5.85741e-05	0.000164413
Cosmopolitan	Columbia_1900	Columbia_1900	Fragaria x ananassa	Giant_Component	Marginal	2	0	2	0	NA	5.85741e-05	0.000164413
Cosmopolitan	Columbus	Columbus	Fragaria x ananassa	Giant_Component	Marginal	2	0	2	0	NA	5.85741e-05	0.000164413
Cosmopolitan	Comet_1880	Comet_1880	Fragaria x ananassa	Giant_Component	Marginal	0	1	1	0	0.00234181	0.000239788	0.000164413
Cosmopolitan	Commission	Commission	Fragaria x ananassa	Giant_Component	Marginal	2	0	2	0	NA	7.32177e-05	0.000164413
Cosmopolitan	Commitment	Commitment	Fragaria x ananassa	Giant_Component	Marginal	2	1	3	157	NA	0.000140618	0.000164413
Cosmopolitan	Competitor	Competitor	Fragaria x ananassa	Giant_Component	Marginal	2	0	2	0	NA	5.85741e-05	0.000164413
Cosmopolitan	Confidence	Confidence	Fragaria x ananassa	Giant_Component	Marginal	2	0	2	0	NA	5.85741e-05	0.000164413
Cosmopolitan	Confitura	Confitura	Fragaria x ananassa	Giant_Component	Marginal	2	0	2	0	NA	6.25411e-05	0.000164413
Cosmopolitan	Connoisseur	Connoisseur	Fragaria x ananassa	Giant_Component	Marginal	2	0	2	0	NA	6.61247e-05	0.000164413
Cosmopolitan	Consort	Consort	Fragaria x ananassa	Giant_Component	Marginal	2	0	2	0	NA	5.85741e-05	0.000164413
Cosmopolitan	Coral	Coral	Fragaria x ananassa	Giant_Component	Marginal	2	0	2	0	NA	6.74453e-05	0.000164413
Cosmopolitan	Cordelia	Cordelia	Fragaria x ananassa	Giant_Component	Marginal	1	0	1	0	NA	5.85741e-05	0.000164413
Cosmopolitan	Cornucopia	Cornucopia	Fragaria x ananassa	Giant_Component	Marginal	1	0	1	0	NA	5.85741e-05	0.000164413
Cosmopolitan	Coronation	Coronation	Fragaria x ananassa	Giant_Component	Marginal	2	0	2	0	NA	5.85741e-05	0.000164413
Cosmopolitan	Corrine	Corrine	Fragaria x ananassa	Giant_Component	Marginal	1	0	1	0	NA	5.85741e-05	0.000164413
Cosmopolitan	Cortina	Cortina	Fragaria x ananassa	Giant_Component	Broker	2	1	3	1143.49	NA	0.000196603	0.000164413
Cosmopolitan	Cortine	Cortine	Fragaria x ananassa	Giant_Component	Marginal	2	0	2	0	NA	5.94929e-05	0.000164413
Cosmopolitan	Cox's_Seedling	Cox's_Seedling	Fragaria x ananassa	Giant_Component	Marginal	1	0	1	0	NA	5.85741e-05	0.000164413
Cosmopolitan	Cream	Cream	Fragaria x ananassa	Giant_Component	Marginal	2	0	2	0	NA	6.13198e-05	0.000164413
Cosmopolitan	Creba	Creba	Fragaria x ananassa	Giant_Component	Marginal	2	0	2	0	NA	7.29238e-05	0.000164413
Cosmopolitan	Crescent_Seedling	Crescent_Seedling	Fragaria x ananassa	Giant_Component	Marginal	2	0	2	0	NA	5.85741e-05	0.000164413
Cosmopolitan	Crimson_Cluster	Crimson_Cluster	Fragaria x ananassa	Giant_Component	Marginal	1	0	1	0	NA	5.85741e-05	0.000164413
Cosmopolitan	Unknown_FC_014	Unknown_chiloensis_014	Fragaria chiloensis	Giant_Component	Locally_Central	0	2	2	0	0.00662899	0.000512963	0
Cosmopolitan	Crimson_Favorite	Crimson_Favorite	Fragaria x ananassa	Giant_Component	Marginal	1	0	1	0	NA	5.85741e-05	0.000164413
Cosmopolitan	Crimson_Glow	Crimson_Glow	Fragaria x ananassa	Giant_Component	Marginal	2	0	2	0	NA	5.85741e-05	0.000164413
Cosmopolitan	Crimson_King	Crimson_King	Fragaria x ananassa	Giant_Component	Marginal	2	0	2	0	NA	6.86508e-05	0.000164413
Cosmopolitan	Crimsonglow	Crimsonglow	Fragaria x ananassa	Giant_Component	Marginal	2	0	2	0	NA	5.85741e-05	0.000164413
Cosmopolitan	Cristal	Cristal	Fragaria x ananassa	Halo	Marginal	2	0	2	0	NA	5.85741e-05	0.000164413
Cosmopolitan	Cristina	Cristina	Fragaria x ananassa	Halo	Marginal	2	0	2	0	NA	5.85741e-05	0.000164413
Cosmopolitan	Cropper	Cropper	Fragaria x ananassa	Giant_Component	Marginal	1	0	1	0	NA	5.85741e-05	0.000164413
Cosmopolitan	Crystalina	Crystalina	Fragaria x ananassa	Halo	Marginal	2	0	2	0	NA	5.85741e-05	0.000164413
Cosmopolitan	Cupcake	Cupcake	Fragaria x ananassa	Halo	Marginal	2	0	2	0	NA	5.85741e-05	0.000164413
Cosmopolitan	Cupid	Cupid	Fragaria x ananassa	Halo	Marginal	2	0	2	0	NA	5.85741e-05	0.000164413
Cosmopolitan	Curtuno	Curtuno	Fragaria x ananassa	Halo	Marginal	0	0	0	0	0	5.85741e-05	0.000164413
Cosmopolitan	Cyoju	Cyoju	Fragaria x ananassa	Halo	Marginal	0	0	0	0	0	5.85741e-05	0.000164413
Cosmopolitan	Daeun	Daeun	Fragaria x ananassa	Giant_Component	Marginal	2	0	2	0	NA	7.21793e-05	0.000164413
Cosmopolitan	Daewang	Daewang	Fragaria x ananassa	Giant_Component	Marginal	2	0	2	0	NA	7.89467e-05	0.000164413
Cosmopolitan	Dahong	Dahong	Fragaria x ananassa	Giant_Component	Marginal	2	0	2	0	NA	7.06977e-05	0.000164413
Cosmopolitan	Daisy	Daisy	Fragaria x ananassa	Giant_Component	Marginal	2	0	2	0	NA	6.2235e-05	0.000164413
Cosmopolitan	Dakota	Dakota	Fragaria x ananassa	Giant_Component	Marginal	1	0	1	0	NA	5.85741e-05	0.000164413
Cosmopolitan	Dama	Dama	Fragaria x ananassa	Giant_Component	Marginal	2	0	2	0	NA	6.06215e-05	0.000164413
Cosmopolitan	Damhyang	Damhyang	Fragaria x ananassa	Giant_Component	Marginal	2	0	2	0	NA	8.71956e-05	0.000164413
Cosmopolitan	Dange	Dange	Fragaria x ananassa	Giant_Component	Marginal	2	0	2	0	NA	5.9888e-05	0.000164413
Cosmopolitan	Dani	Dani	Fragaria x ananassa	Halo	Marginal	2	0	2	0	NA	5.85741e-05	0.000164413
Cosmopolitan	Danmi	Danmi	Fragaria x ananassa	Giant_Component	Marginal	2	0	2	0	NA	6.55177e-05	0.000164413
Cosmopolitan	Darboprim	Darboprim	Fragaria x ananassa	Giant_Component	Marginal	2	0	2	0	NA	5.85741e-05	0.000164413
Cosmopolitan	Darleta	Darleta	Fragaria x ananassa	Giant_Component	Marginal	2	0	2	0	NA	6.11046e-05	0.000164413
Cosmopolitan	Darline	Darline	Fragaria x ananassa	Giant_Component	Marginal	2	0	2	0	NA	6.18019e-05	0.000164413
Cosmopolitan	Darling	Darling	Fragaria x ananassa	Giant_Component	Marginal	1	0	1	0	NA	5.85741e-05	0.000164413
Cosmopolitan	Darlington	Darlington	Fragaria x ananassa	Giant_Component	Marginal	1	0	1	0	NA	5.85741e-05	0.000164413
Cosmopolitan	Darlisa	Darlisa	Fragaria x ananassa	Giant_Component	Marginal	2	0	2	0	NA	6.78511e-05	0.000164413
Cosmopolitan	Darlisette	Darlisette	Fragaria x ananassa	Giant_Component	Marginal	2	0	2	0	NA	6.95649e-05	0.000164413
Cosmopolitan	Darsanga	Darsanga	Fragaria x ananassa	Giant_Component	Marginal	2	0	2	0	NA	6.11332e-05	0.000164413
Cosmopolitan	Darsidor	Darsidor	Fragaria x ananassa	Giant_Component	Marginal	2	0	2	0	NA	6.74481e-05	0.000164413
Cosmopolitan	Darsival	Darsival	Fragaria x ananassa	Giant_Component	Marginal	2	0	2	0	NA	5.85741e-05	0.000164413
Cosmopolitan	Darstar	Darstar	Fragaria x ananassa	Giant_Component	Marginal	2	0	2	0	NA	5.85741e-05	0.000164413
Cosmopolitan	Darstella	Darstella	Fragaria x ananassa	Giant_Component	Marginal	2	0	2	0	NA	6.23661e-05	0.000164413
Cosmopolitan	Darubis	Darubis	Fragaria x ananassa	Giant_Component	Marginal	2	0	2	0	NA	6.71489e-05	0.000164413
Cosmopolitan	Daybreak	Daybreak	Fragaria x ananassa	Giant_Component	Marginal	2	0	2	0	NA	5.89495e-05	0.000164413
Cosmopolitan	De_Wet	De_Wet	Fragaria x ananassa	Giant_Component	Marginal	2	0	2	0	NA	5.85741e-05	0.000164413
Cosmopolitan	Deacon	Deacon	Fragaria x ananassa	Giant_Component	Marginal	2	0	2	0	NA	5.85741e-05	0.000164413
Cosmopolitan	Deco_Rouge	Deco_Rouge	Fragaria x ananassa	Giant_Component	Marginal	2	0	2	0	NA	5.85741e-05	0.000164413
Cosmopolitan	Deep_Red	Deep_Red	Fragaria x ananassa	Giant_Component	Marginal	2	0	2	0	NA	6.36045e-05	0.000164413
Cosmopolitan	Deephaven	Deephaven	Fragaria x ananassa	Giant_Component	Marginal	2	0	2	0	NA	7.5377e-05	0.000164413
Cosmopolitan	Delcoce	Delcoce	Fragaria x ananassa	Halo	Marginal	0	0	0	0	0	5.85741e-05	0.000164413
Cosmopolitan	Delecto	Delecto	Fragaria x ananassa	Giant_Component	Locally_Central	1	2	3	108.5	NA	0.000145177	0.000164413
Cosmopolitan	Delefan	Delefan	Fragaria x ananassa	Halo	Marginal	0	0	0	0	0	5.85741e-05	0.000164413
Cosmopolitan	Delia	Delia	Fragaria x ananassa	Giant_Component	Marginal	2	0	2	0	NA	7.08801e-05	0.000164413
Cosmopolitan	Delician	Delician	Fragaria x ananassa	Halo	Marginal	0	0	0	0	0	5.85741e-05	0.000164413
Cosmopolitan	Delicious	Delicious	Fragaria x ananassa	Giant_Component	Marginal	2	0	2	0	NA	5.85741e-05	0.000164413
Cosmopolitan	Della_K	Della_K	Fragaria x ananassa	Giant_Component	Marginal	1	0	1	0	NA	5.85741e-05	0.000164413
Cosmopolitan	Deltomi	Deltomi	Fragaria x ananassa	Halo	Marginal	0	0	0	0	0	5.85741e-05	0.000164413
Cosmopolitan	Deluxe	Deluxe	Fragaria x ananassa	Giant_Component	Marginal	2	0	2	0	NA	5.85741e-05	0.000164413
Cosmopolitan	Dely	Dely	Fragaria x ananassa	Halo	Marginal	2	0	2	0	NA	5.85741e-05	0.000164413
Cosmopolitan	Desdemona	Desdemona	Fragaria x ananassa	Giant_Component	Marginal	1	0	1	0	NA	5.85741e-05	0.000164413
Cosmopolitan	Desna	Desna	Fragaria x ananassa	Giant_Component	Marginal	2	0	2	0	NA	5.85741e-05	0.000164413
Cosmopolitan	Destin	Destin	Fragaria x ananassa	Giant_Component	Marginal	2	0	2	0	NA	5.85741e-05	0.000164413
Cosmopolitan	Deutsch_Evern_Solveta	Deutsch_Evern_Solveta	Fragaria x ananassa	Giant_Component	Marginal	2	0	2	0	NA	6.40655e-05	0.000164413
Cosmopolitan	Dewdrop	Dewdrop	Fragaria x ananassa	Giant_Component	Marginal	2	0	2	0	NA	5.85741e-05	0.000164413
Cosmopolitan	Dewey_1883	Dewey_1883	Fragaria x ananassa	Giant_Component	Marginal	2	0	2	0	NA	7.32177e-05	0.000164413
Cosmopolitan	Dewey_1893	Dewey_1893	Fragaria x ananassa	Giant_Component	Marginal	2	0	2	0	NA	6.58959e-05	0.000164413
Cosmopolitan	Diademe	Diademe	Fragaria x ananassa	Halo	Marginal	0	0	0	0	0	5.85741e-05	0.000164413
Cosmopolitan	Diamond_Berry	Diamond_Berry	Fragaria x ananassa	Giant_Component	Marginal	2	0	2	0	NA	5.85741e-05	0.000164413
Cosmopolitan	Diana	Diana	Fragaria x ananassa	Halo	Marginal	0	0	0	0	0	5.85741e-05	0.000164413
Cosmopolitan	Diastar	Diastar	Fragaria x ananassa	Halo	Marginal	0	0	0	0	0	5.85741e-05	0.000164413
Cosmopolitan	Dicky	Dicky	Fragaria x ananassa	Giant_Component	Marginal	2	0	2	0	NA	5.85741e-05	0.000164413
Cosmopolitan	Diligent	Diligent	Fragaria x ananassa	Giant_Component	Marginal	2	0	2	0	NA	5.85741e-05	0.000164413
Cosmopolitan	Dipred	Dipred	Fragaria x ananassa	Halo	Marginal	0	0	0	0	0	5.85741e-05	0.000164413
Cosmopolitan	Discovery	Discovery	Fragaria x ananassa	Giant_Component	Marginal	2	0	2	0	NA	5.85741e-05	0.000164413
Cosmopolitan	Dita	Dita	Fragaria x ananassa	Giant_Component	Marginal	2	0	2	0	NA	6.05897e-05	0.000164413
Cosmopolitan	Dithmarschen	Dithmarschen	Fragaria x ananassa	Giant_Component	Marginal	2	0	2	0	NA	5.85741e-05	0.000164413
Cosmopolitan	Divnaya	Divnaya	Fragaria x ananassa	Giant_Component	Marginal	2	0	2	0	NA	6.38681e-05	0.000164413
Cosmopolitan	Dixon	Dixon	Fragaria x ananassa	Giant_Component	Marginal	1	0	1	0	NA	5.85741e-05	0.000164413
Cosmopolitan	Doctor_Warder	Doctor_Warder	Fragaria x ananassa	Halo	Marginal	2	0	2	0	NA	5.85741e-05	0.000164413
Cosmopolitan	Dollar_2	Dollar_2	Fragaria x ananassa	Halo	Marginal	1	0	1	0	NA	5.85741e-05	0.000164413
Cosmopolitan	Dollar_Jr.	Dollar_Jr.	Fragaria x ananassa	Halo	Marginal	1	0	1	0	NA	5.85741e-05	0.000164413
Cosmopolitan	Dongxiang	Dongxiang	Fragaria x ananassa	Giant_Component	Marginal	2	0	2	0	NA	5.98976e-05	0.000164413
Cosmopolitan	Donna_2010	Donna_2010	Fragaria x ananassa	Halo	Marginal	2	0	2	0	NA	5.85741e-05	0.000164413
Cosmopolitan	Dora_1895	Dora_1895	Fragaria x ananassa	Giant_Component	Marginal	1	0	1	0	NA	5.85741e-05	0.000164413
Cosmopolitan	Dora_1996	Dora_1996	Fragaria x ananassa	Giant_Component	Marginal	2	0	2	0	NA	5.85741e-05	0.000164413
Cosmopolitan	Dorena	Dorena	Fragaria x ananassa	Halo	Marginal	2	0	2	0	NA	5.85741e-05	0.000164413
Cosmopolitan	Dornan	Dornan	Fragaria x ananassa	Giant_Component	Marginal	0	1	1	0	0	5.85741e-05	0.000164413
Cosmopolitan	Doron	Doron	Fragaria x ananassa	Halo	Marginal	0	0	0	0	0	5.85741e-05	0.000164413
Cosmopolitan	DPI_Twotwelve	DPI_Twotwelve	Fragaria x ananassa	Giant_Component	Marginal	2	0	2	0	NA	6.34402e-05	0.000164413
Cosmopolitan	Dream	Dream	Fragaria x ananassa	Halo	Marginal	2	0	2	0	NA	5.85741e-05	0.000164413
Cosmopolitan	Dresden_1951	Dresden_1951	Fragaria x ananassa	Giant_Component	Marginal	2	0	2	0	NA	5.85741e-05	0.000164413
Cosmopolitan	Dry_Weather	Dry_Weather	Fragaria x ananassa	Giant_Component	Marginal	2	0	2	0	NA	6.02348e-05	0.000164413
Cosmopolitan	Duchess_of_York	Duchess_of_York	Fragaria x ananassa	Giant_Component	Marginal	2	0	2	0	NA	5.85741e-05	0.000164413
Cosmopolitan	Unknown_FC_023	Unknown_chiloensis_023	Fragaria chiloensis	Giant_Component	Marginal	0	1	1	0	0.00558577	0.000432238	0
Cosmopolitan	Duncan	Duncan	Fragaria x ananassa	Giant_Component	Marginal	2	0	2	0	NA	6.77263e-05	0.000164413
Cosmopolitan	Duncan's_Seedling	Duncan's_Seedling	Fragaria x ananassa	Giant_Component	Marginal	1	0	1	0	NA	5.85741e-05	0.000164413
Cosmopolitan	Dunmore	Dunmore	Fragaria x ananassa	Giant_Component	Marginal	2	0	2	0	NA	7.32177e-05	0.000164413
Cosmopolitan	Durban	Durban	Fragaria x ananassa	Halo	Marginal	0	0	0	0	0	5.85741e-05	0.000164413
Cosmopolitan	Durval	Durval	Fragaria x ananassa	Giant_Component	Marginal	2	0	2	0	NA	7.4129e-05	0.000164413
Cosmopolitan	Dutter	Dutter	Fragaria x ananassa	Giant_Component	Marginal	2	0	2	0	NA	5.85741e-05	0.000164413
Cosmopolitan	Earle_Felten	Earle_Felten	Fragaria x ananassa	Giant_Component	Marginal	2	0	2	0	NA	8.17889e-05	0.000164413
Cosmopolitan	Earliblush	Earliblush	Fragaria x ananassa	Giant_Component	Marginal	2	0	2	0	NA	5.85741e-05	0.000164413
Cosmopolitan	Earlimore	Earlimore	Fragaria x ananassa	Giant_Component	Marginal	2	0	2	0	NA	7.1724e-05	0.000164413
Cosmopolitan	Early_Beauty	Early_Beauty	Fragaria x ananassa	Giant_Component	Marginal	1	0	1	0	NA	5.85741e-05	0.000164413
Cosmopolitan	Early_Bird	Early_Bird	Fragaria x ananassa	Giant_Component	Marginal	1	0	1	0	NA	5.85741e-05	0.000164413
Cosmopolitan	Early_Bommel	Early_Bommel	Fragaria x ananassa	Giant_Component	Marginal	2	0	2	0	NA	5.892e-05	0.000164413
Cosmopolitan	Early_Canada	Early_Canada	Fragaria x ananassa	Giant_Component	Marginal	1	0	1	0	NA	5.85741e-05	0.000164413
Cosmopolitan	Early_Harvest	Early_Harvest	Fragaria x ananassa	Giant_Component	Marginal	2	0	2	0	NA	5.85741e-05	0.000164413
Cosmopolitan	Early_Jersey_Giant	Early_Jersey_Giant	Fragaria x ananassa	Giant_Component	Marginal	0	1	1	0	0.00549971	0.000484152	0.000164413
Cosmopolitan	Early_Queen	Early_Queen	Fragaria x ananassa	Halo	Marginal	1	0	1	0	NA	5.85741e-05	0.000164413
Cosmopolitan	EB_18	EB_18	Fragaria x ananassa	Giant_Component	Globally_Central	2	3	5	2684.71	NA	0.000224211	0.000164413
Cosmopolitan	Ebaberi	Ebaberi	Fragaria x ananassa	Giant_Component	Marginal	0	1	1	0	0	5.85741e-05	0.000164413
Cosmopolitan	Echigohime	Echigohime	Fragaria x ananassa	Giant_Component	Globally_Central	2	2	4	442.83	NA	6.52358e-05	0.000164413
Cosmopolitan	Eden	Eden	Fragaria x ananassa	Giant_Component	Marginal	2	0	2	0	NA	6.68683e-05	0.000164413
Cosmopolitan	Edgar_Queen	Edgar_Queen	Fragaria x ananassa	Giant_Component	Marginal	1	0	1	0	NA	5.85741e-05	0.000164413
Cosmopolitan	EF_14	EF_14	Fragaria x ananassa	Halo	Locally_Central	0	2	2	0	0.000756949	5.85741e-05	0.000164413
Cosmopolitan	Effie	Effie	Fragaria x ananassa	Giant_Component	Marginal	1	0	1	0	NA	5.85741e-05	0.000164413
Cosmopolitan	Egla	Egla	Fragaria x ananassa	Giant_Component	Marginal	2	0	2	0	NA	6.14778e-05	0.000164413
Cosmopolitan	Ekey	Ekey	Fragaria x ananassa	Giant_Component	Marginal	2	1	3	137.567	NA	0.000312074	0.000164413
Cosmopolitan	El_Dorado	El_Dorado	Fragaria x ananassa	Giant_Component	Marginal	2	1	3	250	NA	5.85741e-05	0.000164413
Cosmopolitan	Eleanor_Roosevelt	Eleanor_Roosevelt	Fragaria x ananassa	Giant_Component	Locally_Central	2	4	6	68	NA	6.7056e-05	0.000164413
Cosmopolitan	Elianny	Elianny	Fragaria x ananassa	Halo	Marginal	0	0	0	0	0	5.85741e-05	0.000164413
Cosmopolitan	Elin	Elin	Fragaria x ananassa	Giant_Component	Marginal	2	0	2	0	NA	6.00392e-05	0.000164413
Cosmopolitan	Elinore	Elinore	Fragaria x ananassa	Giant_Component	Marginal	2	0	2	0	NA	5.85741e-05	0.000164413
Cosmopolitan	Elizabeth	Elizabeth	Fragaria x ananassa	Giant_Component	Marginal	1	0	1	0	NA	5.85741e-05	0.000164413
Cosmopolitan	Elma	Elma	Fragaria x ananassa	Giant_Component	Marginal	2	0	2	0	NA	5.99756e-05	0.000164413
Cosmopolitan	Elsariusz	Elsariusz	Fragaria x ananassa	Halo	Marginal	0	0	0	0	0	5.85741e-05	0.000164413
Cosmopolitan	Elsegarde	Elsegarde	Fragaria x ananassa	Giant_Component	Marginal	2	0	2	0	NA	6.51079e-05	0.000164413
Cosmopolitan	EM0533	EM0533	Fragaria x ananassa	Halo	Locally_Central	0	2	2	0	0.000756949	5.85741e-05	0.000164413
Cosmopolitan	EM0707	EM0707	Fragaria x ananassa	Giant_Component	Locally_Central	0	2	2	0	0.000756949	5.85741e-05	0.000164413
Cosmopolitan	EM701	EM701	Fragaria x ananassa	Halo	Locally_Central	0	2	2	0	0.000756949	5.85741e-05	0.000164413
Cosmopolitan	EMR153	EMR153	Fragaria x ananassa	Giant_Component	Locally_Central	2	2	4	202	NA	6.61931e-05	0.000164413
Cosmopolitan	Endicott	Endicott	Fragaria x ananassa	Giant_Component	Marginal	2	0	2	0	NA	5.85741e-05	0.000164413
Cosmopolitan	Enormous	Enormous	Fragaria x ananassa	Giant_Component	Marginal	1	0	1	0	NA	5.85741e-05	0.000164413
Cosmopolitan	Enrai	Enrai	Fragaria x ananassa	Giant_Component	Marginal	2	0	2	0	NA	6.33915e-05	0.000164413
Cosmopolitan	Epicure	Epicure	Fragaria x ananassa	Giant_Component	Marginal	2	0	2	0	NA	6.58959e-05	0.000164413
Cosmopolitan	Equinox	Equinox	Fragaria x ananassa	Giant_Component	Marginal	1	0	1	0	NA	5.85741e-05	0.000164413
Cosmopolitan	Essex	Essex	Fragaria x ananassa	Giant_Component	Marginal	2	0	2	0	NA	5.94751e-05	0.000164413
Cosmopolitan	Estafeta	Estafeta	Fragaria x ananassa	Giant_Component	Marginal	2	0	2	0	NA	6.05181e-05	0.000164413
Cosmopolitan	Eureka_1881	Eureka_1881	Fragaria x ananassa	Giant_Component	Marginal	1	0	1	0	NA	5.85741e-05	0.000164413
Cosmopolitan	Eureka_1910	Eureka_1910	Fragaria x ananassa	Giant_Component	Marginal	1	0	1	0	NA	5.85741e-05	0.000164413
Cosmopolitan	Euroka	Euroka	Fragaria x ananassa	Giant_Component	Marginal	2	0	2	0	NA	7.65827e-05	0.000164413
Cosmopolitan	Eva	Eva	Fragaria x ananassa	Giant_Component	Marginal	2	0	2	0	NA	6.84392e-05	0.000164413
Cosmopolitan	Everberry	Everberry	Fragaria x ananassa	Giant_Component	Marginal	2	1	3	121.333	NA	6.07516e-05	0.000164413
Cosmopolitan	Everglade	Everglade	Fragaria x ananassa	Halo	Locally_Central	0	2	2	0	0	5.85741e-05	0.000164413
Cosmopolitan	Everly	Everly	Fragaria x ananassa	Halo	Marginal	0	0	0	0	0	5.85741e-05	0.000164413
Cosmopolitan	Evermore	Evermore	Fragaria x ananassa	Giant_Component	Marginal	2	0	2	0	NA	7.5377e-05	0.000164413
Cosmopolitan	Eve's_Delight	Eve's_Delight	Fragaria x ananassa	Halo	Marginal	2	0	2	0	NA	5.85741e-05	0.000164413
Cosmopolitan	Excelsior_1895	Excelsior_1895	Fragaria x ananassa	Giant_Component	Marginal	2	0	2	0	NA	5.85741e-05	0.000164413
Cosmopolitan	Faith	Faith	Fragaria x ananassa	Halo	Marginal	0	0	0	0	0	5.85741e-05	0.000164413
Cosmopolitan	Fantastic	Fantastic	Fragaria x ananassa	Giant_Component	Marginal	2	0	2	0	NA	5.85741e-05	0.000164413
Cosmopolitan	Fantasy	Fantasy	Fragaria x ananassa	Giant_Component	Marginal	2	0	2	0	NA	6.26493e-05	0.000164413
Cosmopolitan	Favor	Favor	Fragaria x ananassa	Giant_Component	Marginal	2	0	2	0	NA	5.85741e-05	0.000164413
Cosmopolitan	Favori	Favori	Fragaria x ananassa	Halo	Marginal	0	0	0	0	0	5.85741e-05	0.000164413
Cosmopolitan	Favorita	Favorita	Fragaria x ananassa	Halo	Marginal	0	0	0	0	0	5.85741e-05	0.000164413
Cosmopolitan	Felicia	Felicia	Fragaria x ananassa	Giant_Component	Marginal	2	0	2	0	NA	5.86885e-05	0.000164413
Cosmopolitan	Felicita	Felicita	Fragaria x ananassa	Halo	Marginal	0	0	0	0	0	5.85741e-05	0.000164413
Cosmopolitan	Felina	Felina	Fragaria x ananassa	Giant_Component	Marginal	2	0	2	0	NA	5.85741e-05	0.000164413
Cosmopolitan	Felton	Felton	Fragaria x ananassa	Giant_Component	Marginal	1	0	1	0	NA	5.85741e-05	0.000164413
Cosmopolitan	Fendalemo	Fendalemo	Fragaria x ananassa	Giant_Component	Marginal	1	0	1	0	NA	5.85741e-05	0.000164413
Cosmopolitan	Fenella	Fenella	Fragaria x ananassa	Giant_Component	Locally_Central	2	2	4	259.5	NA	5.85741e-05	0.000164413
Cosmopolitan	Fenix	Fenix	Fragaria x ananassa	Halo	Marginal	0	0	0	0	0	5.85741e-05	0.000164413
Cosmopolitan	Feriusz	Feriusz	Fragaria x ananassa	Giant_Component	Marginal	2	0	2	0	NA	6.03731e-05	0.000164413
Cosmopolitan	Feyyerverk	Feyyerverk	Fragaria x ananassa	Giant_Component	Marginal	2	0	2	0	NA	5.86599e-05	0.000164413
Cosmopolitan	Fiesta	Fiesta	Fragaria x ananassa	Giant_Component	Marginal	2	0	2	0	NA	5.85741e-05	0.000164413
Cosmopolitan	Figaro	Figaro	Fragaria x ananassa	Giant_Component	Marginal	2	0	2	0	NA	6.2309e-05	0.000164413
Cosmopolitan	Filbert_Pine	Filbert_Pine	Fragaria x ananassa	Giant_Component	Marginal	0	1	1	0	0.00123004	0.000153757	0.000164413
Cosmopolitan	Filicia	Filicia	Fragaria x ananassa	Halo	Marginal	0	0	0	0	0	5.85741e-05	0.000164413
Cosmopolitan	Filon	Filon	Fragaria x ananassa	Giant_Component	Marginal	2	0	2	0	NA	6.05155e-05	0.000164413
Cosmopolitan	Filut	Filut	Fragaria x ananassa	Giant_Component	Marginal	2	0	2	0	NA	5.85741e-05	0.000164413
Cosmopolitan	Finch's_Seedling	Finch's_Seedling	Fragaria x ananassa	Giant_Component	Marginal	2	0	2	0	NA	6.77263e-05	0.000164413
Cosmopolitan	Finesse	Finesse	Fragaria x ananassa	Giant_Component	Marginal	2	0	2	0	NA	6.22792e-05	0.000164413
Cosmopolitan	First_Quality	First_Quality	Fragaria x ananassa	Giant_Component	Marginal	2	0	2	0	NA	5.85741e-05	0.000164413
Cosmopolitan	Fisher	Fisher	Fragaria x ananassa	Giant_Component	Marginal	2	0	2	0	NA	5.85741e-05	0.000164413
Cosmopolitan	Flair	Flair	Fragaria x ananassa	Halo	Marginal	2	0	2	0	NA	5.85741e-05	0.000164413
Cosmopolitan	Flame	Flame	Fragaria x ananassa	Halo	Marginal	2	0	2	0	NA	5.85741e-05	0.000164413
Cosmopolitan	Flaminia	Flaminia	Fragaria x ananassa	Halo	Marginal	0	0	0	0	0	5.85741e-05	0.000164413
Cosmopolitan	Flavia	Flavia	Fragaria x ananassa	Halo	Marginal	0	0	0	0	0	5.85741e-05	0.000164413
Cosmopolitan	Fleming	Fleming	Fragaria x ananassa	Giant_Component	Marginal	2	0	2	0	NA	6.77263e-05	0.000164413
Cosmopolitan	Fleurette	Fleurette	Fragaria x ananassa	Halo	Marginal	0	0	0	0	0	5.85741e-05	0.000164413
Cosmopolitan	Florella	Florella	Fragaria x ananassa	Giant_Component	Marginal	2	0	2	0	NA	5.85741e-05	0.000164413
Cosmopolitan	Florence_1988	Florence_1988	Fragaria x ananassa	Giant_Component	Marginal	2	0	2	0	NA	6.38326e-05	0.000164413
Cosmopolitan	Florentina	Florentina	Fragaria x ananassa	Halo	Marginal	0	0	0	0	0	5.85741e-05	0.000164413
Cosmopolitan	Florian	Florian	Fragaria x ananassa	Halo	Marginal	0	0	0	0	0	5.85741e-05	0.000164413
Cosmopolitan	Floriante	Floriante	Fragaria x ananassa	Halo	Marginal	0	0	0	0	0	5.85741e-05	0.000164413
Cosmopolitan	Florida_Beauty	Florida_Beauty	Fragaria x ananassa	Giant_Component	Marginal	2	0	2	0	NA	6.64668e-05	0.000164413
Cosmopolitan	Florida_Elyana	Florida_Elyana	Fragaria x ananassa	Giant_Component	Marginal	2	1	3	221	NA	6.46821e-05	0.000164413
Cosmopolitan	Florida_Sweet_Sensation	Florida_Sweet_Sensation	Fragaria x ananassa	Giant_Component	Globally_Central	2	4	6	867.856	NA	6.88184e-05	0.000164413
Cosmopolitan	Florika	Florika	Fragaria x ananassa	Giant_Component	Marginal	2	1	3	38	NA	5.85741e-05	0.000164413
Cosmopolitan	Florina	Florina	Fragaria x ananassa	Halo	Marginal	0	0	0	0	0	5.85741e-05	0.000164413
Cosmopolitan	Fontanilla	Fontanilla	Fragaria x ananassa	Halo	Marginal	2	0	2	0	NA	5.85741e-05	0.000164413
Cosmopolitan	Fort	Fort	Fragaria x ananassa	Giant_Component	Marginal	2	0	2	0	NA	5.85741e-05	0.000164413
Cosmopolitan	Forward	Forward	Fragaria x ananassa	Giant_Component	Marginal	2	0	2	0	NA	6.58959e-05	0.000164413
Cosmopolitan	Fowler's_Seedling	Fowler's_Seedling	Fragaria x ananassa	Giant_Component	Marginal	2	0	2	0	NA	6.68111e-05	0.000164413
Cosmopolitan	Fraburga	Fraburga	Fragaria x ananassa	Giant_Component	Marginal	2	0	2	0	NA	6.68683e-05	0.000164413
Cosmopolitan	Fracttina	Fracttina	Fragaria x ananassa	Giant_Component	Marginal	2	0	2	0	NA	5.86885e-05	0.000164413
Cosmopolitan	Fracunda	Fracunda	Fragaria x ananassa	Giant_Component	Marginal	2	0	2	0	NA	5.86885e-05	0.000164413
Cosmopolitan	Fragana	Fragana	Fragaria x ananassa	Giant_Component	Marginal	2	0	2	0	NA	5.85741e-05	0.000164413
Cosmopolitan	Fraginetta	Fraginetta	Fragaria x ananassa	Giant_Component	Marginal	2	0	2	0	NA	5.85741e-05	0.000164413
Cosmopolitan	Fralona	Fralona	Fragaria x ananassa	Giant_Component	Marginal	2	0	2	0	NA	6.68683e-05	0.000164413
Cosmopolitan	Framura	Framura	Fragaria x ananassa	Giant_Component	Marginal	2	0	2	0	NA	5.97608e-05	0.000164413
Cosmopolitan	Francis	Francis	Fragaria x ananassa	Giant_Component	Marginal	2	0	2	0	NA	5.88029e-05	0.000164413
Cosmopolitan	Fraroma	Fraroma	Fragaria x ananassa	Giant_Component	Marginal	2	0	2	0	NA	5.86617e-05	0.000164413
Cosmopolitan	Free_Silver	Free_Silver	Fragaria x ananassa	Giant_Component	Marginal	2	0	2	0	NA	5.85741e-05	0.000164413
Cosmopolitan	Fremont	Fremont	Fragaria x ananassa	Giant_Component	Marginal	1	0	1	0	NA	5.85741e-05	0.000164413
Cosmopolitan	Fremont_Williams	Fremont_Williams	Fragaria x ananassa	Giant_Component	Marginal	2	0	2	0	NA	5.85741e-05	0.000164413
Cosmopolitan	French's_Seedling	French's_Seedling	Fragaria x ananassa	Giant_Component	Marginal	2	0	2	0	NA	5.85741e-05	0.000164413
Cosmopolitan	Friendship	Friendship	Fragaria x ananassa	Giant_Component	Marginal	1	0	1	0	NA	5.85741e-05	0.000164413
Cosmopolitan	Frikonsa	Frikonsa	Fragaria x ananassa	Giant_Component	Marginal	2	0	2	0	NA	6.00971e-05	0.000164413
Cosmopolitan	Frisan	Frisan	Fragaria x ananassa	Halo	Marginal	0	0	0	0	0	5.85741e-05	0.000164413
Cosmopolitan	Frontenac	Frontenac	Fragaria x ananassa	Giant_Component	Marginal	2	1	3	34.6667	NA	7.1566e-05	0.000164413
Cosmopolitan	Fructarella	Fructarella	Fragaria x ananassa	Giant_Component	Marginal	2	0	2	0	NA	5.86617e-05	0.000164413
Cosmopolitan	Frugodi	Frugodi	Fragaria x ananassa	Halo	Marginal	0	0	0	0	0	5.85741e-05	0.000164413
Cosmopolitan	Fruheste_der_Fruhen	Fruheste_der_Fruhen	Fragaria x ananassa	Giant_Component	Marginal	2	0	2	0	NA	5.85741e-05	0.000164413
Cosmopolitan	Fuentepina	Fuentepina	Fragaria x ananassa	Giant_Component	Marginal	2	0	2	0	NA	5.85741e-05	0.000164413
Cosmopolitan	Fujisaki	Fujisaki	Fragaria x ananassa	Giant_Component	Marginal	2	0	2	0	NA	5.91462e-05	0.000164413
Cosmopolitan	Fukuayaka	Fukuayaka	Fragaria x ananassa	Giant_Component	Marginal	2	0	2	0	NA	6.72018e-05	0.000164413
Cosmopolitan	Fukuharuka	Fukuharuka	Fragaria x ananassa	Giant_Component	Marginal	2	0	2	0	NA	7.21793e-05	0.000164413
Cosmopolitan	Furore	Furore	Fragaria x ananassa	Halo	Marginal	0	0	0	0	0	5.85741e-05	0.000164413
Cosmopolitan	Fusanoka	Fusanoka	Fragaria x ananassa	Giant_Component	Marginal	2	0	2	0	NA	5.85741e-05	0.000164413
Cosmopolitan	Futura	Futura	Fragaria x ananassa	Giant_Component	Marginal	2	0	2	0	NA	5.93966e-05	0.000164413
Cosmopolitan	Gala	Gala	Fragaria x ananassa	Giant_Component	Marginal	2	0	2	0	NA	6.70703e-05	0.000164413
Cosmopolitan	Gala_1998	Gala_1998	Fragaria x ananassa	Giant_Component	Marginal	2	0	2	0	NA	5.85741e-05	0.000164413
Cosmopolitan	Galante	Galante	Fragaria x ananassa	Halo	Marginal	2	0	2	0	NA	5.85741e-05	0.000164413
Cosmopolitan	Galexia	Galexia	Fragaria x ananassa	Halo	Marginal	2	0	2	0	NA	5.85741e-05	0.000164413
Cosmopolitan	Galletta	Galletta	Fragaria x ananassa	Giant_Component	Marginal	2	0	2	0	NA	6.34891e-05	0.000164413
Cosmopolitan	Galliaciv	Galliaciv	Fragaria x ananassa	Halo	Marginal	0	0	0	0	0	5.85741e-05	0.000164413
Cosmopolitan	Gamargua	Gamargua	Fragaria x ananassa	Giant_Component	Marginal	2	0	2	0	NA	5.85741e-05	0.000164413
Cosmopolitan	Gangha	Gangha	Fragaria x ananassa	Giant_Component	Marginal	2	0	2	0	NA	5.90183e-05	0.000164413
Cosmopolitan	Garda	Garda	Fragaria x ananassa	Halo	Marginal	0	0	0	0	0	5.85741e-05	0.000164413
Cosmopolitan	Gardena	Gardena	Fragaria x ananassa	Giant_Component	Marginal	2	0	2	0	NA	5.94929e-05	0.000164413
Cosmopolitan	Garteninspektor_Koch	Garteninspektor_Koch	Fragaria x ananassa	Giant_Component	Locally_Central	0	2	2	0	0.00373485	0.000347584	0.000164413
Cosmopolitan	Gasana	Gasana	Fragaria x ananassa	Halo	Marginal	0	0	0	0	0	5.85741e-05	0.000164413
Cosmopolitan	Gavi	Gavi	Fragaria x ananassa	Halo	Marginal	0	0	0	0	0	5.85741e-05	0.000164413
Cosmopolitan	Gawes_Royal	Gawes_Royal	Fragaria x ananassa	Giant_Component	Marginal	2	0	2	0	NA	5.85741e-05	0.000164413
Cosmopolitan	Gem_Star	Gem_Star	Fragaria x ananassa	Giant_Component	Marginal	2	0	2	0	NA	5.85741e-05	0.000164413
Cosmopolitan	General_Botha	General_Botha	Fragaria x ananassa	Giant_Component	Marginal	1	0	1	0	NA	5.85741e-05	0.000164413
Cosmopolitan	General_Chanzy	General_Chanzy	Fragaria x ananassa	Giant_Component	Globally_Central	2	2	4	1492.25	NA	0.00200505	0.000164413
Cosmopolitan	General_de_Gaulle	General_de_Gaulle	Fragaria x ananassa	Giant_Component	Marginal	2	0	2	0	NA	5.85741e-05	0.000164413
Cosmopolitan	General_Grant	General_Grant	Fragaria x ananassa	Giant_Component	Marginal	2	0	2	0	NA	5.85741e-05	0.000164413
Cosmopolitan	General_Meade	General_Meade	Fragaria x ananassa	Giant_Component	Marginal	2	0	2	0	NA	5.85741e-05	0.000164413
Cosmopolitan	General_Pershing	General_Pershing	Fragaria x ananassa	Halo	Marginal	1	0	1	0	NA	5.85741e-05	0.000164413
Cosmopolitan	General_Putnam	General_Putnam	Fragaria x ananassa	Giant_Component	Marginal	2	0	2	0	NA	6.2235e-05	0.000164413
Cosmopolitan	General_Sherman	General_Sherman	Fragaria x ananassa	Giant_Component	Marginal	2	0	2	0	NA	5.85741e-05	0.000164413
Cosmopolitan	Genesee	Genesee	Fragaria x ananassa	Giant_Component	Marginal	2	0	2	0	NA	5.85741e-05	0.000164413
Cosmopolitan	Gera	Gera	Fragaria x ananassa	Giant_Component	Marginal	2	0	2	0	NA	6.06618e-05	0.000164413
Cosmopolitan	Gerida	Gerida	Fragaria x ananassa	Giant_Component	Marginal	2	0	2	0	NA	6.96241e-05	0.000164413
Cosmopolitan	Geumhyang	Geumhyang	Fragaria x ananassa	Giant_Component	Marginal	2	0	2	0	NA	7.43029e-05	0.000164413
Cosmopolitan	Gianna	Gianna	Fragaria x ananassa	Halo	Marginal	0	0	0	0	0	5.85741e-05	0.000164413
Cosmopolitan	Gill	Gill	Fragaria x ananassa	Giant_Component	Marginal	2	0	2	0	NA	5.85741e-05	0.000164413
Cosmopolitan	Gillespie	Gillespie	Fragaria x ananassa	Giant_Component	Marginal	1	0	1	0	NA	5.85741e-05	0.000164413
Cosmopolitan	Ginza	Ginza	Fragaria x ananassa	Halo	Marginal	2	0	2	0	NA	5.85741e-05	0.000164413
Cosmopolitan	Gitan	Gitan	Fragaria x ananassa	Halo	Marginal	0	0	0	0	0	5.85741e-05	0.000164413
Cosmopolitan	Gladis	Gladis	Fragaria x ananassa	Halo	Marginal	0	0	0	0	0	5.85741e-05	0.000164413
Cosmopolitan	Glare	Glare	Fragaria x ananassa	Giant_Component	Marginal	2	0	2	0	NA	7.11977e-05	0.000164413
Cosmopolitan	Glastonbury	Glastonbury	Fragaria x ananassa	Giant_Component	Marginal	2	0	2	0	NA	5.85741e-05	0.000164413
Cosmopolitan	Glen_Saint_Mary	Glen_Saint_Mary	Fragaria x ananassa	Giant_Component	Marginal	2	0	2	0	NA	5.85741e-05	0.000164413
Cosmopolitan	Glenalice	Glenalice	Fragaria x ananassa	Giant_Component	Marginal	2	0	2	0	NA	5.91266e-05	0.000164413
Cosmopolitan	Glenda	Glenda	Fragaria x ananassa	Giant_Component	Marginal	2	0	2	0	NA	5.85741e-05	0.000164413
Cosmopolitan	Glenfield	Glenfield	Fragaria x ananassa	Giant_Component	Marginal	2	0	2	0	NA	5.85741e-05	0.000164413
Cosmopolitan	Glenman	Glenman	Fragaria x ananassa	Giant_Component	Marginal	2	0	2	0	NA	5.85741e-05	0.000164413
Cosmopolitan	Glenmore	Glenmore	Fragaria x ananassa	Giant_Component	Marginal	2	0	2	0	NA	5.85741e-05	0.000164413
Cosmopolitan	Glenrich	Glenrich	Fragaria x ananassa	Giant_Component	Marginal	2	0	2	0	NA	5.85741e-05	0.000164413
Cosmopolitan	Globose_Cluster	Globose_Cluster	Fragaria x ananassa	Giant_Component	Marginal	1	0	1	0	NA	5.85741e-05	0.000164413
Cosmopolitan	Gloria	Gloria	Fragaria x ananassa	Giant_Component	Marginal	2	0	2	0	NA	5.85741e-05	0.000164413
Cosmopolitan	Glory	Glory	Fragaria x ananassa	Giant_Component	Marginal	2	0	2	0	NA	5.85741e-05	0.000164413
Cosmopolitan	Golan	Golan	Fragaria x ananassa	Halo	Marginal	0	0	0	0	0	5.85741e-05	0.000164413
Cosmopolitan	Golden_Gate	Golden_Gate	Fragaria x ananassa	Giant_Component	Marginal	2	0	2	0	NA	6.47519e-05	0.000164413
Cosmopolitan	Golden_King	Golden_King	Fragaria x ananassa	Giant_Component	Marginal	2	0	2	0	NA	5.85741e-05	0.000164413
Cosmopolitan	Golden_Queen	Golden_Queen	Fragaria x ananassa	Giant_Component	Marginal	1	0	1	0	NA	5.85741e-05	0.000164413
Cosmopolitan	Goliath	Goliath	Fragaria x ananassa	Giant_Component	Broker	1	1	2	2530	NA	0.00108522	0.000164413
Cosmopolitan	Goodell	Goodell	Fragaria x ananassa	Giant_Component	Marginal	2	0	2	0	NA	5.85741e-05	0.000164413
Cosmopolitan	Goodwin	Goodwin	Fragaria x ananassa	Giant_Component	Marginal	2	0	2	0	NA	7.32177e-05	0.000164413
Cosmopolitan	Goree	Goree	Fragaria x ananassa	Giant_Component	Marginal	1	0	1	0	NA	5.85741e-05	0.000164413
Cosmopolitan	Goryeong	Goryeong	Fragaria x ananassa	Giant_Component	Marginal	2	0	2	0	NA	5.85741e-05	0.000164413
Cosmopolitan	Governor_Hoard	Governor_Hoard	Fragaria x ananassa	Giant_Component	Marginal	1	0	1	0	NA	5.85741e-05	0.000164413
Cosmopolitan	Grace	Grace	Fragaria x ananassa	Giant_Component	Marginal	2	0	2	0	NA	5.85741e-05	0.000164413
Cosmopolitan	Granat	Granat	Fragaria x ananassa	Halo	Marginal	0	0	0	0	0	5.85741e-05	0.000164413
Cosmopolitan	Grand_Marie	Grand_Marie	Fragaria x ananassa	Giant_Component	Marginal	2	0	2	0	NA	7.32177e-05	0.000164413
Cosmopolitan	Grandarosa	Grandarosa	Fragaria x ananassa	Giant_Component	Marginal	2	0	2	0	NA	5.98671e-05	0.000164413
Cosmopolitan	Granville	Granville	Fragaria x ananassa	Giant_Component	Marginal	1	0	1	0	NA	5.85741e-05	0.000164413
Cosmopolitan	Gray	Gray	Fragaria x ananassa	Giant_Component	Marginal	1	0	1	0	NA	5.85741e-05	0.000164413
Cosmopolitan	Great_Bay	Great_Bay	Fragaria x ananassa	Giant_Component	Marginal	2	0	2	0	NA	6.27498e-05	0.000164413
Cosmopolitan	Green_Mountain	Green_Mountain	Fragaria x ananassa	Giant_Component	Marginal	2	0	2	0	NA	6.02567e-05	0.000164413
Cosmopolitan	Grenada_Russia	Grenada_Russia	Fragaria x ananassa	Giant_Component	Marginal	2	0	2	0	NA	6.28121e-05	0.000164413
Cosmopolitan	Gudleif	Gudleif	Fragaria x ananassa	Giant_Component	Marginal	2	0	2	0	NA	6.1004e-05	0.000164413
Cosmopolitan	Guillerette	Guillerette	Fragaria x ananassa	Halo	Marginal	0	0	0	0	0	5.85741e-05	0.000164413
Cosmopolitan	Gundor	Gundor	Fragaria x ananassa	Halo	Marginal	0	0	0	0	0	5.85741e-05	0.000164413
Cosmopolitan	Gunton_Park	Gunton_Park	Fragaria x ananassa	Giant_Component	Marginal	2	0	2	0	NA	5.85741e-05	0.000164413
Cosmopolitan	Gwanha	Gwanha	Fragaria x ananassa	Giant_Component	Marginal	2	0	2	0	NA	5.85741e-05	0.000164413
Cosmopolitan	Gyda	Gyda	Fragaria x ananassa	Giant_Component	Marginal	2	0	2	0	NA	7.44735e-05	0.000164413
Cosmopolitan	Gypa	Gypa	Fragaria x ananassa	Giant_Component	Marginal	2	0	2	0	NA	7.44735e-05	0.000164413
Cosmopolitan	Haight	Haight	Fragaria x ananassa	Giant_Component	Marginal	1	0	1	0	NA	5.85741e-05	0.000164413
Cosmopolitan	Haiguan_Zaohong	Haiguan_Zaohong	Fragaria x ananassa	Giant_Component	Marginal	0	1	1	0	0	5.85741e-05	0.000164413
Cosmopolitan	Haley	Haley	Fragaria x ananassa	Halo	Marginal	0	0	0	0	0	5.85741e-05	0.000164413
Cosmopolitan	Ham	Ham	Fragaria x ananassa	Giant_Component	Marginal	2	0	2	0	NA	5.85741e-05	0.000164413
Cosmopolitan	Hanagasaotome	Hanagasaotome	Fragaria x ananassa	Giant_Component	Marginal	2	0	2	0	NA	5.85741e-05	0.000164413
Cosmopolitan	Hanbach	Hanbach	Fragaria x ananassa	Giant_Component	Marginal	2	0	2	0	NA	5.85741e-05	0.000164413
Cosmopolitan	Harmonie	Harmonie	Fragaria x ananassa	Giant_Component	Marginal	2	0	2	0	NA	6.205e-05	0.000164413
Cosmopolitan	Hative_de_Caen	Hative_de_Caen	Fragaria x ananassa	Halo	Marginal	2	0	2	0	NA	8.78612e-05	0.000164413
Cosmopolitan	Havelland	Havelland	Fragaria x ananassa	Giant_Component	Marginal	2	0	2	0	NA	6.27212e-05	0.000164413
Cosmopolitan	Hawaii	Hawaii	Fragaria x ananassa	Giant_Component	Marginal	2	0	2	0	NA	6.58959e-05	0.000164413
Cosmopolitan	Hayazaki	Hayazaki	Fragaria x ananassa	Halo	Marginal	0	0	0	0	0	5.85741e-05	0.000164413
Cosmopolitan	Hazel	Hazel	Fragaria x ananassa	Giant_Component	Marginal	2	0	2	0	NA	5.85741e-05	0.000164413
Cosmopolitan	Heath	Heath	Fragaria x ananassa	Giant_Component	Marginal	2	0	2	0	NA	5.85741e-05	0.000164413
Cosmopolitan	Hebron	Hebron	Fragaria x ananassa	Giant_Component	Marginal	2	0	2	0	NA	5.85741e-05	0.000164413
Cosmopolitan	Hedley	Hedley	Fragaria x ananassa	Giant_Component	Marginal	2	0	2	0	NA	6.25411e-05	0.000164413
Cosmopolitan	Heinemann's_Unerschopfliche	Heinemann's_Unerschopfliche	Fragaria x ananassa	Giant_Component	Marginal	2	0	2	0	NA	5.85741e-05	0.000164413
Cosmopolitan	Helen_Gould	Helen_Gould	Fragaria x ananassa	Giant_Component	Marginal	2	0	2	0	NA	5.85741e-05	0.000164413
Cosmopolitan	Helena_Gloede	Helena_Gloede	Fragaria x ananassa	Giant_Component	Marginal	0	1	1	0	0.00274394	0.000270905	0.000164413
Cosmopolitan	Henry_Ward_Beecher	Henry_Ward_Beecher	Fragaria x ananassa	Giant_Component	Marginal	2	0	2	0	NA	5.85741e-05	0.000164413
Cosmopolitan	Hera	Hera	Fragaria x ananassa	Giant_Component	Marginal	2	0	2	0	NA	5.85741e-05	0.000164413
Cosmopolitan	Herbst	Herbst	Fragaria x ananassa	Giant_Component	Marginal	1	0	1	0	NA	5.85741e-05	0.000164413
Cosmopolitan	Hercule	Hercule	Fragaria x ananassa	Giant_Component	Marginal	2	0	2	0	NA	5.85741e-05	0.000164413
Cosmopolitan	Hercules	Hercules	Fragaria x ananassa	Giant_Component	Marginal	2	0	2	0	NA	5.85741e-05	0.000164413
Cosmopolitan	Hermia	Hermia	Fragaria x ananassa	Giant_Component	Marginal	1	0	1	0	NA	5.85741e-05	0.000164413
Cosmopolitan	Hermione	Hermione	Fragaria x ananassa	Halo	Marginal	0	0	0	0	0	5.85741e-05	0.000164413
Cosmopolitan	Heros	Heros	Fragaria x ananassa	Giant_Component	Marginal	2	0	2	0	NA	7.52802e-05	0.000164413
Cosmopolitan	Herriot	Herriot	Fragaria x ananassa	Giant_Component	Marginal	2	0	2	0	NA	6.20388e-05	0.000164413
Cosmopolitan	Herz_As	Herz_As	Fragaria x ananassa	Giant_Component	Marginal	2	0	2	0	NA	5.85741e-05	0.000164413
Cosmopolitan	Hiawatha	Hiawatha	Fragaria x ananassa	Giant_Component	Marginal	1	0	1	0	NA	5.85741e-05	0.000164413
Cosmopolitan	Hilcrest	Hilcrest	Fragaria x ananassa	Giant_Component	Marginal	2	0	2	0	NA	5.85741e-05	0.000164413
Cosmopolitan	Himatsuri	Himatsuri	Fragaria x ananassa	Giant_Component	Marginal	1	0	1	0	NA	5.85741e-05	0.000164413
Cosmopolitan	Hinomine	Hinomine	Fragaria x ananassa	Giant_Component	Marginal	2	1	3	123.47	NA	6.67665e-05	0.000164413
Cosmopolitan	Hobdoel	Hobdoel	Fragaria x ananassa	Halo	Marginal	0	0	0	0	0	5.85741e-05	0.000164413
Cosmopolitan	Hobelda	Hobelda	Fragaria x ananassa	Halo	Marginal	0	0	0	0	0	5.85741e-05	0.000164413
Cosmopolitan	Hobottrece	Hobottrece	Fragaria x ananassa	Halo	Marginal	0	0	0	0	0	5.85741e-05	0.000164413
Cosmopolitan	Hobson's_Choice	Hobson's_Choice	Fragaria x ananassa	Giant_Component	Marginal	2	0	2	0	NA	6.58959e-05	0.000164413
Cosmopolitan	Hobthurcon	Hobthurcon	Fragaria x ananassa	Halo	Marginal	0	0	0	0	0	5.85741e-05	0.000164413
Cosmopolitan	Hobthurmarcin	Hobthurmarcin	Fragaria x ananassa	Halo	Marginal	0	0	0	0	0	5.85741e-05	0.000164413
Cosmopolitan	Hobthurmardu	Hobthurmardu	Fragaria x ananassa	Halo	Marginal	0	0	0	0	0	5.85741e-05	0.000164413
Cosmopolitan	Hobthurmarqua	Hobthurmarqua	Fragaria x ananassa	Halo	Marginal	0	0	0	0	0	5.85741e-05	0.000164413
Cosmopolitan	Hobthurmarsei	Hobthurmarsei	Fragaria x ananassa	Halo	Marginal	0	0	0	0	0	5.85741e-05	0.000164413
Cosmopolitan	Hobthurmartre	Hobthurmartre	Fragaria x ananassa	Halo	Marginal	0	0	0	0	0	5.85741e-05	0.000164413
Cosmopolitan	Hobthurmarun	Hobthurmarun	Fragaria x ananassa	Halo	Marginal	0	0	0	0	0	5.85741e-05	0.000164413
Cosmopolitan	Holtges_Rheingauperle	Holtges_Rheingauperle	Fragaria x ananassa	Giant_Component	Marginal	2	0	2	0	NA	6.27212e-05	0.000164413
Cosmopolitan	Honey_Lump	Honey_Lump	Fragaria x ananassa	Giant_Component	Marginal	1	0	1	0	NA	5.85741e-05	0.000164413
Cosmopolitan	Honeymoon	Honeymoon	Fragaria x ananassa	Giant_Component	Marginal	2	0	2	0	NA	5.88387e-05	0.000164413
Cosmopolitan	Hongbok	Hongbok	Fragaria x ananassa	Halo	Marginal	2	0	2	0	NA	8.78612e-05	0.000164413
Cosmopolitan	Hongxiutianxiang	Hongxiutianxiang	Fragaria x ananassa	Giant_Component	Marginal	2	0	2	0	NA	5.98976e-05	0.000164413
Cosmopolitan	Horsey	Horsey	Fragaria x ananassa	Giant_Component	Marginal	2	0	2	0	NA	7.15302e-05	0.000164413
Cosmopolitan	Hotta_Wonder	Hotta_Wonder	Fragaria x ananassa	Giant_Component	Marginal	2	0	2	0	NA	5.85741e-05	0.000164413
Cosmopolitan	Houkouwase	Houkouwase	Fragaria x ananassa	Giant_Component	Marginal	2	0	2	0	NA	6.28911e-05	0.000164413
Cosmopolitan	Howard	Howard	Fragaria x ananassa	Giant_Component	Marginal	2	0	2	0	NA	5.85741e-05	0.000164413
Cosmopolitan	Howard_Supreme	Howard_Supreme	Fragaria x ananassa	Giant_Component	Locally_Central	2	6	8	154	NA	6.78408e-05	0.000164413
Cosmopolitan	Howe	Howe	Fragaria x ananassa	Giant_Component	Marginal	2	0	2	0	NA	5.85741e-05	0.000164413
Cosmopolitan	Hub	Hub	Fragaria x ananassa	Giant_Component	Marginal	2	0	2	0	NA	5.85741e-05	0.000164413
Cosmopolitan	Huddleston's_Favorite	Huddleston's_Favorite	Fragaria x ananassa	Giant_Component	Marginal	2	0	2	0	NA	6.31502e-05	0.000164413
Cosmopolitan	Hulta	Hulta	Fragaria x ananassa	Giant_Component	Marginal	2	0	2	0	NA	5.85741e-05	0.000164413
Cosmopolitan	Hummi	Hummi	Fragaria x ananassa	Halo	Marginal	0	0	0	0	0	5.85741e-05	0.000164413
Cosmopolitan	Hummi_Aroma	Hummi_Aroma	Fragaria x ananassa	Giant_Component	Marginal	2	0	2	0	NA	5.85741e-05	0.000164413
Cosmopolitan	Hummi_Bella	Hummi_Bella	Fragaria x ananassa	Giant_Component	Marginal	2	0	2	0	NA	5.85741e-05	0.000164413
Cosmopolitan	Hummi_Ferma	Hummi_Ferma	Fragaria x ananassa	Giant_Component	Marginal	1	0	1	0	NA	5.85741e-05	0.000164413
Cosmopolitan	Hunterdon	Hunterdon	Fragaria x ananassa	Giant_Component	Marginal	2	0	2	0	NA	5.85741e-05	0.000164413
Cosmopolitan	Ideal	Ideal	Fragaria x ananassa	Giant_Component	Marginal	2	0	2	0	NA	5.85741e-05	0.000164413
Cosmopolitan	Indiana_1875	Indiana_1875	Fragaria x ananassa	Giant_Component	Marginal	1	0	1	0	NA	5.85741e-05	0.000164413
Cosmopolitan	Indiana_1905	Indiana_1905	Fragaria x ananassa	Giant_Component	Marginal	2	0	2	0	NA	5.85741e-05	0.000164413
Cosmopolitan	Indra	Indra	Fragaria x ananassa	Giant_Component	Marginal	2	0	2	0	NA	5.91748e-05	0.000164413
Cosmopolitan	Ines	Ines	Fragaria x ananassa	Halo	Marginal	0	0	0	0	0	5.85741e-05	0.000164413
Cosmopolitan	Inga_1933	Inga_1933	Fragaria x ananassa	Giant_Component	Marginal	2	0	2	0	NA	5.85741e-05	0.000164413
Cosmopolitan	Inspire	Inspire	Fragaria x ananassa	Giant_Component	Marginal	2	0	2	0	NA	5.85741e-05	0.000164413
Cosmopolitan	Iowa	Iowa	Fragaria x ananassa	Giant_Component	Marginal	2	0	2	0	NA	6.10624e-05	0.000164413
Cosmopolitan	Iowa_3-7165	Iowa_3-7165	Fragaria x ananassa	Giant_Component	Locally_Central	2	2	4	93	NA	8.73338e-05	0.000164413
Cosmopolitan	Irena	Irena	Fragaria x ananassa	Giant_Component	Marginal	2	0	2	0	NA	5.85741e-05	0.000164413
Cosmopolitan	Iris	Iris	Fragaria x ananassa	Giant_Component	Marginal	2	0	2	0	NA	5.97393e-05	0.000164413
Cosmopolitan	Isabella	Isabella	Fragaria x ananassa	Giant_Component	Marginal	2	0	2	0	NA	5.88311e-05	0.000164413
Cosmopolitan	Isaura	Isaura	Fragaria x ananassa	Halo	Marginal	0	0	0	0	0	5.85741e-05	0.000164413
Cosmopolitan	Ischia	Ischia	Fragaria x ananassa	Halo	Marginal	2	0	2	0	NA	5.85741e-05	0.000164413
Cosmopolitan	Island	Island	Fragaria x ananassa	Giant_Component	Marginal	1	0	1	0	NA	5.85741e-05	0.000164413
Cosmopolitan	Itasca_1886	Itasca_1886	Fragaria x ananassa	Giant_Component	Marginal	2	0	2	0	NA	5.85741e-05	0.000164413
Cosmopolitan	Ivanhoe	Ivanhoe	Fragaria x ananassa	Giant_Component	Marginal	2	0	2	0	NA	5.85741e-05	0.000164413
Cosmopolitan	James_Veitch	James_Veitch	Fragaria x ananassa	Giant_Component	Marginal	0	1	1	0	0.0114534	0.000944857	0.000164413
Cosmopolitan	James_Vick	James_Vick	Fragaria x ananassa	Giant_Component	Marginal	1	0	1	0	NA	5.85741e-05	0.000164413
Cosmopolitan	Jana	Jana	Fragaria x ananassa	Halo	Marginal	0	0	0	0	0	5.85741e-05	0.000164413
Cosmopolitan	Jangha	Jangha	Fragaria x ananassa	Giant_Component	Marginal	2	0	2	0	NA	6.55101e-05	0.000164413
Cosmopolitan	Janiss	Janiss	Fragaria x ananassa	Halo	Marginal	0	0	0	0	0	5.85741e-05	0.000164413
Cosmopolitan	Jarbalo	Jarbalo	Fragaria x ananassa	Giant_Component	Marginal	1	0	1	0	NA	5.85741e-05	0.000164413
Cosmopolitan	Jenny_Lind	Jenny_Lind	Fragaria x ananassa	Giant_Component	Marginal	2	0	2	0	NA	5.85741e-05	0.000164413
Cosmopolitan	Jerry_Rusk	Jerry_Rusk	Fragaria x ananassa	Giant_Component	Marginal	2	0	2	0	NA	5.85741e-05	0.000164413
Cosmopolitan	Jim	Jim	Fragaria x ananassa	Giant_Component	Marginal	1	0	1	0	NA	5.85741e-05	0.000164413
Cosmopolitan	Jim_Dumas	Jim_Dumas	Fragaria x ananassa	Giant_Component	Marginal	2	0	2	0	NA	5.85741e-05	0.000164413
Cosmopolitan	Jingchengxiang	Jingchengxiang	Fragaria x ananassa	Giant_Component	Marginal	2	0	2	0	NA	5.85741e-05	0.000164413
Cosmopolitan	Jingchunxiang	Jingchunxiang	Fragaria x ananassa	Giant_Component	Marginal	2	0	2	0	NA	5.85741e-05	0.000164413
Cosmopolitan	Jingliuxiang	Jingliuxiang	Fragaria x ananassa	Giant_Component	Marginal	2	0	2	0	NA	5.98976e-05	0.000164413
Cosmopolitan	Jingquanxiang	Jingquanxiang	Fragaria x ananassa	Giant_Component	Marginal	2	0	2	0	NA	5.85741e-05	0.000164413
Cosmopolitan	Jingtaoxiang	Jingtaoxiang	Fragaria x ananassa	Giant_Component	Marginal	2	0	2	0	NA	6.02055e-05	0.000164413
Cosmopolitan	Jingyao	Jingyao	Fragaria x ananassa	Giant_Component	Marginal	2	0	2	0	NA	7.21793e-05	0.000164413
Cosmopolitan	Jingyixiang	Jingyixiang	Fragaria x ananassa	Giant_Component	Marginal	2	0	2	0	NA	5.98976e-05	0.000164413
Cosmopolitan	Jingyuxiang	Jingyuxiang	Fragaria x ananassa	Giant_Component	Marginal	2	0	2	0	NA	5.98976e-05	0.000164413
Cosmopolitan	Jingzangxiang	Jingzangxiang	Fragaria x ananassa	Giant_Component	Marginal	2	0	2	0	NA	5.85741e-05	0.000164413
Cosmopolitan	Jive	Jive	Fragaria x ananassa	Halo	Marginal	2	0	2	0	NA	5.85741e-05	0.000164413
Cosmopolitan	Joan	Joan	Fragaria x ananassa	Giant_Component	Marginal	2	0	2	0	NA	5.85741e-05	0.000164413
Cosmopolitan	Joe_Wheeler	Joe_Wheeler	Fragaria x ananassa	Giant_Component	Marginal	1	0	1	0	NA	5.85741e-05	0.000164413
Cosmopolitan	Joerica	Joerica	Fragaria x ananassa	Giant_Component	Marginal	1	0	1	0	NA	5.85741e-05	0.000164413
Cosmopolitan	Joghana	Joghana	Fragaria x ananassa	Giant_Component	Marginal	2	0	2	0	NA	5.92378e-05	0.000164413
Cosmopolitan	Johannes_Muller	Johannes_Muller	Fragaria x ananassa	Giant_Component	Marginal	1	1	2	18	NA	0.000274566	0.000164413
Cosmopolitan	John	John	Fragaria x ananassa	Giant_Component	Marginal	1	0	1	0	NA	5.85741e-05	0.000164413
Cosmopolitan	John_Ruskin	John_Ruskin	Fragaria x ananassa	Giant_Component	Marginal	2	1	3	45.5	NA	0.000154815	0.000164413
Cosmopolitan	Joly	Joly	Fragaria x ananassa	Halo	Marginal	2	0	2	0	NA	5.85741e-05	0.000164413
Cosmopolitan	Jonica	Jonica	Fragaria x ananassa	Giant_Component	Marginal	1	0	1	0	NA	5.85741e-05	0.000164413
Cosmopolitan	Josaenghingsim	Josaenghingsim	Fragaria x ananassa	Giant_Component	Marginal	2	0	2	0	NA	5.85741e-05	0.000164413
Cosmopolitan	Jota	Jota	Fragaria x ananassa	Giant_Component	Marginal	2	0	2	0	NA	6.22184e-05	0.000164413
Cosmopolitan	Jubilae	Jubilae	Fragaria x ananassa	Giant_Component	Marginal	2	0	2	0	NA	5.85741e-05	0.000164413
Cosmopolitan	Jubilee_1952	Jubilee_1952	Fragaria x ananassa	Giant_Component	Marginal	2	0	2	0	NA	5.86027e-05	0.000164413
Cosmopolitan	Jubilee_1999	Jubilee_1999	Fragaria x ananassa	Giant_Component	Locally_Central	2	2	4	4	NA	5.85741e-05	0.000164413
Cosmopolitan	Jucunda_Improved	Jucunda_Improved	Fragaria x ananassa	Giant_Component	Marginal	1	0	1	0	NA	5.85741e-05	0.000164413
Cosmopolitan	Judibell	Judibell	Fragaria x ananassa	Halo	Marginal	2	0	2	0	NA	5.85741e-05	0.000164413
Cosmopolitan	Jukhyang	Jukhyang	Fragaria x ananassa	Giant_Component	Marginal	2	0	2	0	NA	7.06977e-05	0.000164413
Cosmopolitan	Julia	Julia	Fragaria x ananassa	Giant_Component	Marginal	1	0	1	0	NA	5.85741e-05	0.000164413
Cosmopolitan	Julien	Julien	Fragaria x ananassa	Giant_Component	Marginal	1	0	1	0	NA	5.85741e-05	0.000164413
Cosmopolitan	Juliet	Juliet	Fragaria x ananassa	Halo	Marginal	0	0	0	0	0	5.85741e-05	0.000164413
Cosmopolitan	Juline	Juline	Fragaria x ananassa	Giant_Component	Marginal	2	0	2	0	NA	5.85741e-05	0.000164413
Cosmopolitan	July	July	Fragaria x ananassa	Giant_Component	Marginal	2	0	2	0	NA	6.3379e-05	0.000164413
Cosmopolitan	July_Morn	July_Morn	Fragaria x ananassa	Giant_Component	Marginal	2	0	2	0	NA	5.86027e-05	0.000164413
Cosmopolitan	Junberry	Junberry	Fragaria x ananassa	Giant_Component	Marginal	0	1	1	0	0	5.85741e-05	0.000164413
Cosmopolitan	June_Rockhill	June_Rockhill	Fragaria x ananassa	Giant_Component	Marginal	1	0	1	0	NA	5.85741e-05	0.000164413
Cosmopolitan	Junimorgen	Junimorgen	Fragaria x ananassa	Giant_Component	Marginal	2	0	2	0	NA	6.25411e-05	0.000164413
Cosmopolitan	Jupiter	Jupiter	Fragaria x ananassa	Giant_Component	Marginal	2	0	2	0	NA	5.85741e-05	0.000164413
Cosmopolitan	Kalinda	Kalinda	Fragaria x ananassa	Giant_Component	Marginal	2	0	2	0	NA	5.85741e-05	0.000164413
Cosmopolitan	Kamila	Kamila	Fragaria x ananassa	Halo	Marginal	0	0	0	0	0	5.85741e-05	0.000164413
Cosmopolitan	Kanamihime	Kanamihime	Fragaria x ananassa	Giant_Component	Marginal	2	0	2	0	NA	8.52521e-05	0.000164413
Cosmopolitan	Kanner_King	Kanner_King	Fragaria x ananassa	Giant_Component	Marginal	1	0	1	0	NA	5.85741e-05	0.000164413
Cosmopolitan	Kansas_Prolific	Kansas_Prolific	Fragaria x ananassa	Giant_Component	Marginal	1	0	1	0	NA	5.85741e-05	0.000164413
Cosmopolitan	Karan	Karan	Fragaria x ananassa	Halo	Marginal	0	0	0	0	0	5.85741e-05	0.000164413
Cosmopolitan	Karel	Karel	Fragaria x ananassa	Giant_Component	Marginal	2	0	2	0	NA	6.50611e-05	0.000164413
Cosmopolitan	Karina	Karina	Fragaria x ananassa	Giant_Component	Locally_Central	2	4	6	261.482	NA	8.65802e-05	0.000164413
Cosmopolitan	Karla	Karla	Fragaria x ananassa	Giant_Component	Marginal	2	0	2	0	NA	7.75954e-05	0.000164413
Cosmopolitan	Karmen	Karmen	Fragaria x ananassa	Giant_Component	Marginal	2	0	2	0	NA	5.87162e-05	0.000164413
Cosmopolitan	Karola	Karola	Fragaria x ananassa	Giant_Component	Marginal	2	0	2	0	NA	6.6287e-05	0.000164413
Cosmopolitan	Kaster	Kaster	Fragaria x ananassa	Giant_Component	Marginal	2	0	2	0	NA	5.86885e-05	0.000164413
Cosmopolitan	Kasuga	Kasuga	Fragaria x ananassa	Giant_Component	Marginal	2	0	2	0	NA	5.91174e-05	0.000164413
Cosmopolitan	Kaunotar	Kaunotar	Fragaria x ananassa	Giant_Component	Marginal	2	0	2	0	NA	5.85741e-05	0.000164413
Cosmopolitan	Kekiwase	Kekiwase	Fragaria x ananassa	Giant_Component	Marginal	2	0	2	0	NA	6.47765e-05	0.000164413
Cosmopolitan	Kellogg's_Perfection	Kellogg's_Perfection	Fragaria x ananassa	Giant_Component	Marginal	2	0	2	0	NA	7.5377e-05	0.000164413
Cosmopolitan	Kellogg's_Prize	Kellogg's_Prize	Fragaria x ananassa	Giant_Component	Marginal	0	1	1	0	0.00123004	0.000153757	0.000164413
Cosmopolitan	Ken_Sheehy	Ken_Sheehy	Fragaria x ananassa	Giant_Component	Marginal	2	0	2	0	NA	5.85741e-05	0.000164413
Cosmopolitan	Kendall	Kendall	Fragaria x ananassa	Giant_Component	Marginal	1	0	1	0	NA	5.85741e-05	0.000164413
Cosmopolitan	Kentaro	Kentaro	Fragaria x ananassa	Giant_Component	Marginal	2	0	2	0	NA	6.52953e-05	0.000164413
Cosmopolitan	Keumhyang	Keumhyang	Fragaria x ananassa	Giant_Component	Marginal	2	0	2	0	NA	7.43029e-05	0.000164413
Cosmopolitan	Kevitt	Kevitt	Fragaria x ananassa	Giant_Component	Marginal	2	0	2	0	NA	5.85741e-05	0.000164413
Cosmopolitan	Kiewa	Kiewa	Fragaria x ananassa	Giant_Component	Marginal	2	0	2	0	NA	6.89919e-05	0.000164413
Cosmopolitan	Killarney	Killarney	Fragaria x ananassa	Giant_Component	Marginal	2	0	2	0	NA	5.85741e-05	0.000164413
Cosmopolitan	King_George_V	King_George_V	Fragaria x ananassa	Giant_Component	Marginal	2	0	2	0	NA	5.92606e-05	0.000164413
Cosmopolitan	Kissena	Kissena	Fragaria x ananassa	Giant_Component	Marginal	2	0	2	0	NA	5.85741e-05	0.000164413
Cosmopolitan	Kiyoka	Kiyoka	Fragaria x ananassa	Giant_Component	Marginal	1	0	1	0	NA	5.85741e-05	0.000164413
Cosmopolitan	Koju	Koju	Fragaria x ananassa	Giant_Component	Marginal	2	0	2	0	NA	5.85741e-05	0.000164413
Cosmopolitan	Komet	Komet	Fragaria x ananassa	Giant_Component	Marginal	2	0	2	0	NA	5.85741e-05	0.000164413
Cosmopolitan	Konia	Konia	Fragaria x ananassa	Giant_Component	Marginal	2	0	2	0	NA	6.16851e-05	0.000164413
Cosmopolitan	Konservnaya_Plotnaya	Konservnaya_Plotnaya	Fragaria x ananassa	Giant_Component	Marginal	2	0	2	0	NA	6.3129e-05	0.000164413
Cosmopolitan	Koro	Koro	Fragaria x ananassa	Giant_Component	Marginal	2	0	2	0	NA	5.85741e-05	0.000164413
Cosmopolitan	Korrado	Korrado	Fragaria x ananassa	Giant_Component	Marginal	2	0	2	0	NA	5.92576e-05	0.000164413
Cosmopolitan	Kortes	Kortes	Fragaria x ananassa	Halo	Marginal	2	0	2	0	NA	5.85741e-05	0.000164413
Cosmopolitan	Kouril	Kouril	Fragaria x ananassa	Giant_Component	Marginal	2	0	2	0	NA	6.05605e-05	0.000164413
Cosmopolitan	Kramer	Kramer	Fragaria x ananassa	Giant_Component	Marginal	1	0	1	0	NA	5.85741e-05	0.000164413
Cosmopolitan	Krasnaya_Kapelka	Krasnaya_Kapelka	Fragaria x ananassa	Halo	Marginal	2	0	2	0	NA	5.85741e-05	0.000164413
Cosmopolitan	Kristina	Kristina	Fragaria x ananassa	Giant_Component	Marginal	2	0	2	0	NA	5.86885e-05	0.000164413
Cosmopolitan	Kulkari	Kulkari	Fragaria x ananassa	Halo	Marginal	0	0	0	0	0	5.85741e-05	0.000164413
Cosmopolitan	Kuropatkin	Kuropatkin	Fragaria x ananassa	Giant_Component	Marginal	2	0	2	0	NA	5.85741e-05	0.000164413
Cosmopolitan	Kyoko	Kyoko	Fragaria x ananassa	Giant_Component	Marginal	2	0	2	0	NA	7.3055e-05	0.000164413
Cosmopolitan	Kyokuho	Kyokuho	Fragaria x ananassa	Giant_Component	Marginal	2	0	2	0	NA	5.8735e-05	0.000164413
Cosmopolitan	La_Chapelaine	La_Chapelaine	Fragaria x ananassa	Giant_Component	Marginal	2	0	2	0	NA	6.18609e-05	0.000164413
Cosmopolitan	La_Cle_Des_Champs	La_Cle_Des_Champs	Fragaria x ananassa	Giant_Component	Marginal	2	0	2	0	NA	6.13131e-05	0.000164413
Cosmopolitan	La_France_Pacifique	La_France_Pacifique	Fragaria x ananassa	Giant_Component	Marginal	0	1	1	0	0.000851568	0.00012447	0.000164413
Cosmopolitan	Lacombe	Lacombe	Fragaria x ananassa	Giant_Component	Marginal	2	0	2	0	NA	5.85741e-05	0.000164413
Cosmopolitan	Ladies'_Aromatic	Ladies'_Aromatic	Fragaria x ananassa	Giant_Component	Marginal	1	0	1	0	NA	5.85741e-05	0.000164413
Cosmopolitan	Lady_Jane	Lady_Jane	Fragaria x ananassa	Giant_Component	Marginal	2	0	2	0	NA	5.97182e-05	0.000164413
Cosmopolitan	Lady_of_the_Lake	Lady_of_the_Lake	Fragaria x ananassa	Giant_Component	Marginal	2	0	2	0	NA	5.85741e-05	0.000164413
Cosmopolitan	Lady_Suffield	Lady_Suffield	Fragaria x ananassa	Giant_Component	Marginal	2	0	2	0	NA	7.32177e-05	0.000164413
Cosmopolitan	Laetitia	Laetitia	Fragaria x ananassa	Halo	Marginal	0	0	0	0	0	5.85741e-05	0.000164413
Cosmopolitan	Lafollette	Lafollette	Fragaria x ananassa	Halo	Marginal	1	0	1	0	NA	5.85741e-05	0.000164413
Cosmopolitan	Lakomaya	Lakomaya	Fragaria x ananassa	Giant_Component	Marginal	2	0	2	0	NA	5.86599e-05	0.000164413
Cosmopolitan	Lanai	Lanai	Fragaria x ananassa	Giant_Component	Marginal	2	1	3	4	NA	5.85741e-05	0.000164413
Cosmopolitan	Large_Early_Scarlet	Large_Early_Scarlet	Fragaria virginiana	Giant_Component	Locally_Central	0	2	2	2	0	5.85741e-05	0.000164413
Cosmopolitan	Late_Cross	Late_Cross	Fragaria x ananassa	Giant_Component	Marginal	1	0	1	0	NA	5.85741e-05	0.000164413
Cosmopolitan	Latest	Latest	Fragaria x ananassa	Giant_Component	Marginal	2	0	2	0	NA	5.85741e-05	0.000164413
Cosmopolitan	Latham	Latham	Fragaria x ananassa	Giant_Component	Marginal	1	0	1	0	NA	5.85741e-05	0.000164413
Cosmopolitan	Laura	Laura	Fragaria x ananassa	Giant_Component	Marginal	2	0	2	0	NA	5.85741e-05	0.000164413
Cosmopolitan	Laurel	Laurel	Fragaria x ananassa	Giant_Component	Marginal	2	0	2	0	NA	6.51675e-05	0.000164413
Cosmopolitan	L'Authentique_Orleans	L'Authentique_Orleans	Fragaria x ananassa	Giant_Component	Marginal	2	0	2	0	NA	6.77631e-05	0.000164413
Cosmopolitan	Laxton's_Climax	Laxton's_Climax	Fragaria x ananassa	Giant_Component	Marginal	2	0	2	0	NA	5.85741e-05	0.000164413
Cosmopolitan	Laxton's_Leader	Laxton's_Leader	Fragaria x ananassa	Giant_Component	Marginal	2	0	2	0	NA	5.85741e-05	0.000164413
Cosmopolitan	Le_Baron	Le_Baron	Fragaria x ananassa	Giant_Component	Marginal	1	0	1	0	NA	5.85741e-05	0.000164413
Cosmopolitan	Legal_Tender	Legal_Tender	Fragaria x ananassa	Halo	Marginal	2	0	2	0	NA	5.85741e-05	0.000164413
Cosmopolitan	Lehigh	Lehigh	Fragaria x ananassa	Giant_Component	Marginal	1	0	1	0	NA	5.85741e-05	0.000164413
Cosmopolitan	Leningradskaja_Pozdnjaja	Leningradskaja_Pozdnjaja	Fragaria x ananassa	Halo	Marginal	2	0	2	0	NA	5.85741e-05	0.000164413
Cosmopolitan	Lennig	Lennig	Fragaria x ananassa	Giant_Component	Locally_Central	1	2	3	16	NA	5.85741e-05	0.000164413
Cosmopolitan	Lester_Lovett	Lester_Lovett	Fragaria x ananassa	Giant_Component	Marginal	1	0	1	0	NA	5.85741e-05	0.000164413
Cosmopolitan	Levan	Levan	Fragaria x ananassa	Halo	Marginal	0	0	0	0	0	5.85741e-05	0.000164413
Cosmopolitan	Leviathan	Leviathan	Fragaria x ananassa	Giant_Component	Marginal	1	0	1	0	NA	5.85741e-05	0.000164413
Cosmopolitan	Lewisham_Scarlet	Lewisham_Scarlet	Fragaria x ananassa	Giant_Component	Marginal	1	0	1	0	NA	5.85741e-05	0.000164413
Cosmopolitan	Lia	Lia	Fragaria x ananassa	Halo	Marginal	0	0	0	0	0	5.85741e-05	0.000164413
Cosmopolitan	Liberty	Liberty	Fragaria x ananassa	Giant_Component	Marginal	2	0	2	0	NA	5.85741e-05	0.000164413
Cosmopolitan	Liberty_Bell	Liberty_Bell	Fragaria x ananassa	Giant_Component	Marginal	1	0	1	0	NA	5.85741e-05	0.000164413
Cosmopolitan	Lidka	Lidka	Fragaria x ananassa	Giant_Component	Marginal	2	0	2	0	NA	5.85741e-05	0.000164413
Cosmopolitan	Lili	Lili	Fragaria x ananassa	Halo	Marginal	0	0	0	0	0	5.85741e-05	0.000164413
Cosmopolitan	Lina	Lina	Fragaria x ananassa	Giant_Component	Marginal	2	0	2	0	NA	6.82991e-05	0.000164413
Cosmopolitan	Lincoln	Lincoln	Fragaria x ananassa	Giant_Component	Marginal	2	0	2	0	NA	5.85741e-05	0.000164413
Cosmopolitan	Lindenwald	Lindenwald	Fragaria x ananassa	Giant_Component	Marginal	2	0	2	0	NA	5.85741e-05	0.000164413
Cosmopolitan	Linosa	Linosa	Fragaria x ananassa	Halo	Marginal	2	0	2	0	NA	5.85741e-05	0.000164413
Cosmopolitan	Livingston	Livingston	Fragaria x ananassa	Giant_Component	Marginal	2	0	2	0	NA	5.85741e-05	0.000164413
Cosmopolitan	Liza	Liza	Fragaria x ananassa	Halo	Marginal	0	0	0	0	0	5.85741e-05	0.000164413
Cosmopolitan	Locke_Lake_Ruby	Locke_Lake_Ruby	Fragaria x ananassa	Giant_Component	Marginal	1	0	1	0	NA	5.85741e-05	0.000164413
Cosmopolitan	Logan	Logan	Fragaria x ananassa	Giant_Component	Marginal	1	0	1	0	NA	5.85741e-05	0.000164413
Cosmopolitan	Longfield	Longfield	Fragaria x ananassa	Giant_Component	Marginal	1	0	1	0	NA	5.85741e-05	0.000164413
Cosmopolitan	Loomis_Pearl	Loomis_Pearl	Fragaria x ananassa	Giant_Component	Marginal	1	0	1	0	NA	5.85741e-05	0.000164413
Cosmopolitan	Loran	Loran	Fragaria x ananassa	Halo	Marginal	0	0	0	0	0	5.85741e-05	0.000164413
Cosmopolitan	Lord_Beatty	Lord_Beatty	Fragaria x ananassa	Giant_Component	Marginal	1	0	1	0	NA	5.85741e-05	0.000164413
Cosmopolitan	Lord_Kitchener	Lord_Kitchener	Fragaria x ananassa	Giant_Component	Marginal	2	0	2	0	NA	5.85741e-05	0.000164413
Cosmopolitan	Lorette	Lorette	Fragaria x ananassa	Halo	Marginal	0	0	0	0	0	5.85741e-05	0.000164413
Cosmopolitan	Louie	Louie	Fragaria x ananassa	Halo	Marginal	0	0	0	0	0	5.85741e-05	0.000164413
Cosmopolitan	Louis_Ella	Louis_Ella	Fragaria x ananassa	Giant_Component	Marginal	1	0	1	0	NA	5.85741e-05	0.000164413
Cosmopolitan	Louis_Hubach	Louis_Hubach	Fragaria x ananassa	Giant_Component	Marginal	2	0	2	0	NA	5.85741e-05	0.000164413
Cosmopolitan	Lourdesa	Lourdesa	Fragaria x ananassa	Halo	Marginal	0	0	0	0	0	5.85741e-05	0.000164413
Cosmopolitan	Loyal	Loyal	Fragaria x ananassa	Giant_Component	Marginal	1	0	1	0	NA	5.85741e-05	0.000164413
Cosmopolitan	Lucetta	Lucetta	Fragaria x ananassa	Giant_Component	Marginal	1	0	1	0	NA	5.85741e-05	0.000164413
Cosmopolitan	Lucia	Lucia	Fragaria x ananassa	Halo	Marginal	2	0	2	0	NA	5.85741e-05	0.000164413
Cosmopolitan	Lucida_Perfecta	Lucida_Perfecta	Fragaria x ananassa	Giant_Component	Marginal	2	1	3	36	NA	0.000274668	0.000164413
Cosmopolitan	Lucky_Cross	Lucky_Cross	Fragaria x ananassa	Giant_Component	Marginal	1	0	1	0	NA	5.85741e-05	0.000164413
Cosmopolitan	Lucretta	Lucretta	Fragaria x ananassa	Giant_Component	Marginal	1	0	1	0	NA	5.85741e-05	0.000164413
Cosmopolitan	Luiza	Luiza	Fragaria x ananassa	Halo	Marginal	0	0	0	0	0	5.85741e-05	0.000164413
Cosmopolitan	Lumina	Lumina	Fragaria x ananassa	Giant_Component	Marginal	2	0	2	0	NA	5.91783e-05	0.000164413
Cosmopolitan	Lumotar	Lumotar	Fragaria x ananassa	Giant_Component	Marginal	2	0	2	0	NA	6.01871e-05	0.000164413
Cosmopolitan	Luna	Luna	Fragaria x ananassa	Giant_Component	Marginal	2	0	2	0	NA	6.17579e-05	0.000164413
Cosmopolitan	Lustre	Lustre	Fragaria x ananassa	Giant_Component	Marginal	2	0	2	0	NA	8.17889e-05	0.000164413
Cosmopolitan	Luxury	Luxury	Fragaria x ananassa	Giant_Component	Marginal	2	0	2	0	NA	5.94894e-05	0.000164413
Cosmopolitan	Lyons	Lyons	Fragaria x ananassa	Giant_Component	Marginal	1	0	1	0	NA	5.85741e-05	0.000164413
Cosmopolitan	Macao	Macao	Fragaria x ananassa	Halo	Marginal	0	0	0	0	0	5.85741e-05	0.000164413
Cosmopolitan	Macarena	Macarena	Fragaria x ananassa	Halo	Marginal	2	0	2	0	NA	5.85741e-05	0.000164413
Cosmopolitan	Machern	Machern	Fragaria x ananassa	Giant_Component	Marginal	1	0	1	0	NA	5.85741e-05	0.000164413
Cosmopolitan	Machuzhinka	Machuzhinka	Fragaria x ananassa	Giant_Component	Marginal	2	0	2	0	NA	5.85741e-05	0.000164413
Cosmopolitan	Mackenzie	Mackenzie	Fragaria x ananassa	Giant_Component	Marginal	2	0	2	0	NA	6.2328e-05	0.000164413
Cosmopolitan	Madeleine	Madeleine	Fragaria x ananassa	Giant_Component	Marginal	2	0	2	0	NA	5.89534e-05	0.000164413
Cosmopolitan	Mae	Mae	Fragaria x ananassa	Giant_Component	Marginal	2	0	2	0	NA	6.20409e-05	0.000164413
Cosmopolitan	Maggie	Maggie	Fragaria x ananassa	Giant_Component	Marginal	2	0	2	0	NA	5.85741e-05	0.000164413
Cosmopolitan	Magic	Magic	Fragaria x ananassa	Giant_Component	Marginal	2	0	2	0	NA	5.85741e-05	0.000164413
Cosmopolitan	Magnate	Magnate	Fragaria x ananassa	Giant_Component	Marginal	1	0	1	0	NA	5.85741e-05	0.000164413
Cosmopolitan	Magnum_Bonum	Magnum_Bonum	Fragaria x ananassa	Giant_Component	Marginal	2	0	2	0	NA	5.85741e-05	0.000164413
Cosmopolitan	Magnus	Magnus	Fragaria x ananassa	Giant_Component	Marginal	2	0	2	0	NA	5.85741e-05	0.000164413
Cosmopolitan	Magura	Magura	Fragaria x ananassa	Giant_Component	Marginal	2	0	2	0	NA	6.06005e-05	0.000164413
Cosmopolitan	Maincrop	Maincrop	Fragaria x ananassa	Giant_Component	Marginal	2	0	2	0	NA	6.64679e-05	0.000164413
Cosmopolitan	Mainperle	Mainperle	Fragaria x ananassa	Giant_Component	Marginal	2	0	2	0	NA	6.2235e-05	0.000164413
Cosmopolitan	Majestic_1924	Majestic_1924	Fragaria x ananassa	Giant_Component	Marginal	1	0	1	0	NA	5.85741e-05	0.000164413
Cosmopolitan	Majestic_1940	Majestic_1940	Fragaria x ananassa	Giant_Component	Marginal	1	0	1	0	NA	5.85741e-05	0.000164413
Cosmopolitan	Majesty	Majesty	Fragaria x ananassa	Giant_Component	Marginal	2	0	2	0	NA	5.85741e-05	0.000164413
Cosmopolitan	Majoral	Majoral	Fragaria x ananassa	Giant_Component	Marginal	2	0	2	0	NA	5.85741e-05	0.000164413
Cosmopolitan	Malach	Malach	Fragaria x ananassa	Giant_Component	Marginal	2	0	2	0	NA	6.60515e-05	0.000164413
Cosmopolitan	Malah	Malah	Fragaria x ananassa	Giant_Component	Marginal	2	0	2	0	NA	6.60515e-05	0.000164413
Cosmopolitan	Malga	Malga	Fragaria x ananassa	Giant_Component	Marginal	2	0	2	0	NA	5.85741e-05	0.000164413
Cosmopolitan	Malibu	Malibu	Fragaria x ananassa	Giant_Component	Marginal	2	0	2	0	NA	5.85741e-05	0.000164413
Cosmopolitan	Malinda	Malinda	Fragaria x ananassa	Giant_Component	Marginal	0	0	0	0	0	5.85741e-05	0.000164413
Cosmopolitan	Malling_Centenary	Malling_Centenary	Fragaria x ananassa	Halo	Marginal	2	0	2	0	NA	5.85741e-05	0.000164413
Cosmopolitan	Malling_Glow	Malling_Glow	Fragaria x ananassa	Giant_Component	Marginal	2	0	2	0	NA	6.6578e-05	0.000164413
Cosmopolitan	Malling_Opal	Malling_Opal	Fragaria x ananassa	Giant_Component	Marginal	2	0	2	0	NA	5.85741e-05	0.000164413
Cosmopolitan	Malling_Pearl	Malling_Pearl	Fragaria x ananassa	Giant_Component	Marginal	2	0	2	0	NA	5.85741e-05	0.000164413
Cosmopolitan	Malling_Silk	Malling_Silk	Fragaria x ananassa	Giant_Component	Marginal	2	0	2	0	NA	5.85741e-05	0.000164413
Cosmopolitan	Malling_Sunrise	Malling_Sunrise	Fragaria x ananassa	Giant_Component	Marginal	2	0	2	0	NA	5.85741e-05	0.000164413
Cosmopolitan	Malvina	Malvina	Fragaria x ananassa	Giant_Component	Marginal	1	0	1	0	NA	5.85741e-05	0.000164413
Cosmopolitan	Malwina	Malwina	Fragaria x ananassa	Giant_Component	Marginal	2	0	2	0	NA	5.85741e-05	0.000164413
Cosmopolitan	Manhyang	Manhyang	Fragaria x ananassa	Giant_Component	Marginal	2	0	2	0	NA	6.57021e-05	0.000164413
Cosmopolitan	Manille	Manille	Fragaria x ananassa	Giant_Component	Marginal	2	0	2	0	NA	5.95868e-05	0.000164413
Cosmopolitan	Manokin	Manokin	Fragaria x ananassa	Giant_Component	Marginal	2	0	2	0	NA	5.85741e-05	0.000164413
Cosmopolitan	Manwell	Manwell	Fragaria x ananassa	Giant_Component	Marginal	2	0	2	0	NA	5.85741e-05	0.000164413
Cosmopolitan	Maple_Bank	Maple_Bank	Fragaria x ananassa	Giant_Component	Marginal	2	0	2	0	NA	6.77263e-05	0.000164413
Cosmopolitan	Marabella	Marabella	Fragaria x ananassa	Giant_Component	Marginal	2	0	2	0	NA	6.0123e-05	0.000164413
Cosmopolitan	Maragrande	Maragrande	Fragaria x ananassa	Giant_Component	Marginal	2	0	2	0	NA	5.85741e-05	0.000164413
Cosmopolitan	Marajox	Marajox	Fragaria x ananassa	Giant_Component	Marginal	1	0	1	0	NA	5.85741e-05	0.000164413
Cosmopolitan	Maraprime	Maraprime	Fragaria x ananassa	Giant_Component	Marginal	2	0	2	0	NA	6.11562e-05	0.000164413
Cosmopolitan	Marascor	Marascor	Fragaria x ananassa	Giant_Component	Marginal	2	0	2	0	NA	5.85741e-05	0.000164413
Cosmopolitan	Marastil	Marastil	Fragaria x ananassa	Giant_Component	Marginal	2	0	2	0	NA	5.85741e-05	0.000164413
Cosmopolitan	Marcat	Marcat	Fragaria x ananassa	Giant_Component	Marginal	2	0	2	0	NA	6.69272e-05	0.000164413
Cosmopolitan	Marconi	Marconi	Fragaria x ananassa	Giant_Component	Marginal	2	0	2	0	NA	5.85741e-05	0.000164413
Cosmopolitan	Marduk	Marduk	Fragaria x ananassa	Giant_Component	Marginal	2	0	2	0	NA	6.69272e-05	0.000164413
Cosmopolitan	Mareva	Mareva	Fragaria x ananassa	Giant_Component	Marginal	2	0	2	0	NA	5.95869e-05	0.000164413
Cosmopolitan	Marguerite	Marguerite	Fragaria x ananassa	Giant_Component	Marginal	2	0	2	0	NA	5.85741e-05	0.000164413
Cosmopolitan	Mari	Mari	Fragaria x ananassa	Giant_Component	Marginal	2	0	2	0	NA	5.85741e-05	0.000164413
Cosmopolitan	Maria	Maria	Fragaria x ananassa	Giant_Component	Marginal	2	0	2	0	NA	5.96511e-05	0.000164413
Cosmopolitan	Mariana	Mariana	Fragaria x ananassa	Giant_Component	Marginal	1	0	1	0	NA	5.85741e-05	0.000164413
Cosmopolitan	Marie	Marie	Fragaria x ananassa	Giant_Component	Marginal	2	0	2	0	NA	6.2235e-05	0.000164413
Cosmopolitan	Marilyn	Marilyn	Fragaria x ananassa	Giant_Component	Marginal	2	0	2	0	NA	6.77673e-05	0.000164413
Cosmopolitan	Marin	Marin	Fragaria x ananassa	Giant_Component	Marginal	2	1	3	2	NA	5.85741e-05	0.000164413
Cosmopolitan	Marina	Marina	Fragaria x ananassa	Giant_Component	Marginal	2	0	2	0	NA	5.85741e-05	0.000164413
Cosmopolitan	Mariola	Mariola	Fragaria x ananassa	Giant_Component	Marginal	2	0	2	0	NA	7.70418e-05	0.000164413
Cosmopolitan	Marjolaine	Marjolaine	Fragaria x ananassa	Giant_Component	Marginal	1	0	1	0	NA	5.85741e-05	0.000164413
Cosmopolitan	Mark	Mark	Fragaria x ananassa	Giant_Component	Marginal	1	0	1	0	NA	5.85741e-05	0.000164413
Cosmopolitan	Mark_Hanna	Mark_Hanna	Fragaria x ananassa	Giant_Component	Marginal	1	0	1	0	NA	5.85741e-05	0.000164413
Cosmopolitan	Marlate_1989	Marlate_1989	Fragaria x ananassa	Halo	Marginal	2	0	2	0	NA	5.85741e-05	0.000164413
Cosmopolitan	Marloun	Marloun	Fragaria x ananassa	Giant_Component	Marginal	2	0	2	0	NA	5.85741e-05	0.000164413
Cosmopolitan	Marmion	Marmion	Fragaria x ananassa	Giant_Component	Marginal	2	0	2	0	NA	6.51932e-05	0.000164413
Cosmopolitan	Maroochy_Jewel	Maroochy_Jewel	Fragaria x ananassa	Giant_Component	Marginal	2	0	2	0	NA	6.29409e-05	0.000164413
Cosmopolitan	Maroochy_Redgem	Maroochy_Redgem	Fragaria x ananassa	Giant_Component	Marginal	2	0	2	0	NA	5.85741e-05	0.000164413
Cosmopolitan	Maroochy_Sundew	Maroochy_Sundew	Fragaria x ananassa	Giant_Component	Marginal	2	0	2	0	NA	6.29409e-05	0.000164413
Cosmopolitan	Marquise	Marquise	Fragaria x ananassa	Giant_Component	Marginal	2	0	2	0	NA	5.95106e-05	0.000164413
Cosmopolitan	Marshal_Foch	Marshal_Foch	Fragaria x ananassa	Giant_Component	Marginal	2	0	2	0	NA	5.85741e-05	0.000164413
Cosmopolitan	Marshmello	Marshmello	Fragaria x ananassa	Giant_Component	Marginal	2	0	2	0	NA	6.20838e-05	0.000164413
Cosmopolitan	Martha	Martha	Fragaria x ananassa	Giant_Component	Marginal	1	0	1	0	NA	5.85741e-05	0.000164413
Cosmopolitan	Maruska	Maruska	Fragaria x ananassa	Halo	Marginal	0	0	0	0	0	5.85741e-05	0.000164413
Cosmopolitan	Marvel_2001	Marvel_2001	Fragaria x ananassa	Giant_Component	Marginal	2	0	2	0	NA	5.85741e-05	0.000164413
Cosmopolitan	Marvin	Marvin	Fragaria x ananassa	Giant_Component	Marginal	2	0	2	0	NA	5.85741e-05	0.000164413
Cosmopolitan	Mary_1903	Mary_1903	Fragaria x ananassa	Giant_Component	Marginal	1	0	1	0	NA	5.85741e-05	0.000164413
Cosmopolitan	Marys_Peak	Marys_Peak	Fragaria x ananassa	Giant_Component	Marginal	2	0	2	0	NA	6.29951e-05	0.000164413
Cosmopolitan	Marysa	Marysa	Fragaria x ananassa	Giant_Component	Marginal	2	0	2	0	NA	5.87162e-05	0.000164413
Cosmopolitan	Masterpiece	Masterpiece	Fragaria x ananassa	Giant_Component	Marginal	1	0	1	0	NA	5.85741e-05	0.000164413
Cosmopolitan	Matilda	Matilda	Fragaria x ananassa	Giant_Component	Marginal	1	0	1	0	NA	5.85741e-05	0.000164413
Cosmopolitan	Matis	Matis	Fragaria x ananassa	Giant_Component	Marginal	2	0	2	0	NA	5.85741e-05	0.000164413
Cosmopolitan	Maud_Muller	Maud_Muller	Fragaria x ananassa	Giant_Component	Marginal	1	0	1	0	NA	5.85741e-05	0.000164413
Cosmopolitan	Mauranna	Mauranna	Fragaria x ananassa	Halo	Marginal	0	0	0	0	0	5.85741e-05	0.000164413
Cosmopolitan	May_King	May_King	Fragaria x ananassa	Giant_Component	Marginal	1	0	1	0	NA	5.85741e-05	0.000164413
Cosmopolitan	May_Queen	May_Queen	Fragaria x ananassa	Giant_Component	Locally_Central	0	2	2	0	0	5.85741e-05	0.000164413
Cosmopolitan	Mayflower	Mayflower	Fragaria x ananassa	Giant_Component	Marginal	2	0	2	0	NA	5.85741e-05	0.000164413
Cosmopolitan	Maywood	Maywood	Fragaria x ananassa	Giant_Component	Marginal	2	0	2	0	NA	5.85741e-05	0.000164413
Cosmopolitan	McAlpine	McAlpine	Fragaria x ananassa	Giant_Component	Marginal	2	0	2	0	NA	5.85741e-05	0.000164413
Cosmopolitan	McClintock	McClintock	Fragaria x ananassa	Giant_Component	Marginal	2	0	2	0	NA	8.78612e-05	0.000164413
Cosmopolitan	McNeil	McNeil	Fragaria x ananassa	Giant_Component	Marginal	1	0	1	0	NA	5.85741e-05	0.000164413
Cosmopolitan	Mden	Mden	Fragaria x ananassa	Giant_Component	Marginal	2	0	2	0	NA	5.85741e-05	0.000164413
Cosmopolitan	Medina	Medina	Fragaria x ananassa	Giant_Component	Marginal	2	0	2	0	NA	6.57829e-05	0.000164413
Cosmopolitan	Megana	Megana	Fragaria x ananassa	Giant_Component	Marginal	2	0	2	0	NA	5.85741e-05	0.000164413
Cosmopolitan	Megumi	Megumi	Fragaria x ananassa	Giant_Component	Marginal	2	0	2	0	NA	7.95732e-05	0.000164413
Cosmopolitan	Mele	Mele	Fragaria x ananassa	Giant_Component	Marginal	1	0	1	0	NA	5.85741e-05	0.000164413
Cosmopolitan	Melissa	Melissa	Fragaria x ananassa	Giant_Component	Marginal	2	0	2	0	NA	7.32177e-05	0.000164413
Cosmopolitan	Mellany	Mellany	Fragaria x ananassa	Halo	Marginal	0	0	0	0	0	5.85741e-05	0.000164413
Cosmopolitan	Mellie_Hubach	Mellie_Hubach	Fragaria x ananassa	Giant_Component	Marginal	2	0	2	0	NA	5.85741e-05	0.000164413
Cosmopolitan	Mentmore	Mentmore	Fragaria x ananassa	Giant_Component	Marginal	2	0	2	0	NA	5.85741e-05	0.000164413
Cosmopolitan	Merit	Merit	Fragaria x ananassa	Giant_Component	Marginal	2	0	2	0	NA	5.85741e-05	0.000164413
Cosmopolitan	Merkur	Merkur	Fragaria x ananassa	Giant_Component	Marginal	2	0	2	0	NA	5.85741e-05	0.000164413
Cosmopolitan	Merlan	Merlan	Fragaria x ananassa	Halo	Marginal	0	0	0	0	0	5.85741e-05	0.000164413
Cosmopolitan	Merton_Herald	Merton_Herald	Fragaria x ananassa	Giant_Component	Marginal	2	0	2	0	NA	5.9425e-05	0.000164413
Cosmopolitan	Merton_Princess	Merton_Princess	Fragaria x ananassa	Giant_Component	Broker	2	1	3	500.5	NA	0.000208035	0.000164413
Cosmopolitan	Merton_Ruby	Merton_Ruby	Fragaria x ananassa	Giant_Component	Marginal	2	0	2	0	NA	5.97396e-05	0.000164413
Cosmopolitan	Merveille_de_France	Merveille_de_France	Fragaria x ananassa	Giant_Component	Marginal	2	0	2	0	NA	5.89173e-05	0.000164413
Cosmopolitan	Methven_Scarlet	Methven_Scarlet	Fragaria x ananassa	Giant_Component	Broker	1	1	2	3095	NA	0.00503527	0.000164413
Cosmopolitan	Miami	Miami	Fragaria x ananassa	Giant_Component	Marginal	1	0	1	0	NA	5.85741e-05	0.000164413
Cosmopolitan	Michigan	Michigan	Fragaria x ananassa	Giant_Component	Marginal	2	0	2	0	NA	5.85741e-05	0.000164413
Cosmopolitan	Midnight	Midnight	Fragaria x ananassa	Giant_Component	Marginal	2	0	2	0	NA	6.58959e-05	0.000164413
Cosmopolitan	Mieze_Nova	Mieze_Nova	Fragaria x ananassa	Giant_Component	Marginal	1	0	1	0	NA	5.85741e-05	0.000164413
Cosmopolitan	Mihong	Mihong	Fragaria x ananassa	Giant_Component	Marginal	2	0	2	0	NA	6.99083e-05	0.000164413
Cosmopolitan	Milan	Milan	Fragaria x ananassa	Halo	Marginal	0	0	0	0	0	5.85741e-05	0.000164413
Cosmopolitan	Milcin	Milcin	Fragaria x ananassa	Giant_Component	Marginal	2	0	2	0	NA	7.23722e-05	0.000164413
Cosmopolitan	Millay_Everbearer	Millay_Everbearer	Fragaria x ananassa	Giant_Component	Marginal	1	0	1	0	NA	5.85741e-05	0.000164413
Cosmopolitan	Millewa	Millewa	Fragaria x ananassa	Giant_Component	Marginal	2	0	2	0	NA	6.54732e-05	0.000164413
Cosmopolitan	Millionaire	Millionaire	Fragaria x ananassa	Giant_Component	Marginal	2	0	2	0	NA	6.04046e-05	0.000164413
Cosmopolitan	Milprima	Milprima	Fragaria x ananassa	Giant_Component	Marginal	2	0	2	0	NA	7.29238e-05	0.000164413
Cosmopolitan	Mimokigahoro	Mimokigahoro	Fragaria x ananassa	Giant_Component	Marginal	2	1	3	3	NA	5.85741e-05	0.000164413
Cosmopolitan	Mindarie	Mindarie	Fragaria x ananassa	Giant_Component	Marginal	2	0	2	0	NA	8.07364e-05	0.000164413
Cosmopolitan	Mingxu	Mingxu	Fragaria x ananassa	Giant_Component	Marginal	2	0	2	0	NA	5.85741e-05	0.000164413
Cosmopolitan	Minnehaha	Minnehaha	Fragaria x ananassa	Giant_Component	Marginal	2	0	2	0	NA	5.85741e-05	0.000164413
Cosmopolitan	Minnetonka	Minnetonka	Fragaria x ananassa	Giant_Component	Marginal	2	0	2	0	NA	5.85741e-05	0.000164413
Cosmopolitan	Minomusume	Minomusume	Fragaria x ananassa	Giant_Component	Marginal	2	0	2	0	NA	7.21209e-05	0.000164413
Cosmopolitan	Miranche	Miranche	Fragaria x ananassa	Giant_Component	Marginal	1	0	1	0	NA	5.85741e-05	0.000164413
Cosmopolitan	Miranda_1906	Miranda_1906	Fragaria x ananassa	Giant_Component	Marginal	1	0	1	0	NA	5.85741e-05	0.000164413
Cosmopolitan	Mississippi	Mississippi	Fragaria x ananassa	Giant_Component	Marginal	1	0	1	0	NA	5.85741e-05	0.000164413
Cosmopolitan	Miyasaki	Miyasaki	Fragaria x ananassa	Giant_Component	Marginal	0	1	1	0	0	5.85741e-05	0.000164413
Cosmopolitan	Miyoshi	Miyoshi	Fragaria x ananassa	Giant_Component	Marginal	2	0	2	0	NA	5.85741e-05	0.000164413
Cosmopolitan	Model	Model	Fragaria x ananassa	Giant_Component	Marginal	1	0	1	0	NA	5.85741e-05	0.000164413
Cosmopolitan	Monitor_1859	Monitor_1859	Fragaria x ananassa	Giant_Component	Marginal	1	0	1	0	NA	5.85741e-05	0.000164413
Cosmopolitan	Monitor_1893	Monitor_1893	Fragaria x ananassa	Giant_Component	Marginal	2	0	2	0	NA	6.31502e-05	0.000164413
Cosmopolitan	Monitor_1898	Monitor_1898	Fragaria x ananassa	Giant_Component	Marginal	2	0	2	0	NA	5.85741e-05	0.000164413
Cosmopolitan	Monmouth	Monmouth	Fragaria x ananassa	Giant_Component	Marginal	2	0	2	0	NA	5.85741e-05	0.000164413
Cosmopolitan	Monmouth_1885	Monmouth_1885	Fragaria x ananassa	Giant_Component	Marginal	2	0	2	0	NA	5.85741e-05	0.000164413
Cosmopolitan	Monroe	Monroe	Fragaria x ananassa	Giant_Component	Marginal	2	0	2	0	NA	5.85741e-05	0.000164413
Cosmopolitan	Monroe_Scarlet	Monroe_Scarlet	Fragaria x ananassa	Giant_Component	Marginal	2	0	2	0	NA	5.85741e-05	0.000164413
Cosmopolitan	Montalvo	Montalvo	Fragaria x ananassa	Giant_Component	Marginal	2	0	2	0	NA	5.85741e-05	0.000164413
Cosmopolitan	Montana_Missionary	Montana_Missionary	Fragaria x ananassa	Halo	Marginal	0	0	0	0	0	5.85741e-05	0.000164413
Cosmopolitan	Montrose	Montrose	Fragaria x ananassa	Giant_Component	Marginal	2	0	2	0	NA	6.51932e-05	0.000164413
Cosmopolitan	Moore's_Early	Moore's_Early	Fragaria x ananassa	Giant_Component	Marginal	2	0	2	0	NA	5.85741e-05	0.000164413
Cosmopolitan	Moore's_Prolific	Moore's_Prolific	Fragaria x ananassa	Giant_Component	Marginal	0	1	1	0	0.00241278	0.000274566	0.000164413
Cosmopolitan	Morgan	Morgan	Fragaria x ananassa	Giant_Component	Marginal	2	0	2	0	NA	5.85741e-05	0.000164413
Cosmopolitan	Morgansteoma	Morgansteoma	Fragaria x ananassa	Giant_Component	Marginal	2	0	2	0	NA	6.68111e-05	0.000164413
Cosmopolitan	Mote's_Seedling	Mote's_Seedling	Fragaria x ananassa	Giant_Component	Marginal	2	0	2	0	NA	5.85741e-05	0.000164413
Cosmopolitan	Mottier's_Seedling	Mottier's_Seedling	Fragaria x ananassa	Giant_Component	Marginal	1	0	1	0	NA	5.85741e-05	0.000164413
Cosmopolitan	Mount_Everest	Mount_Everest	Fragaria x ananassa	Halo	Marginal	0	0	0	0	0	5.85741e-05	0.000164413
Cosmopolitan	Mr._Big	Mr._Big	Fragaria x ananassa	Giant_Component	Marginal	1	0	1	0	NA	5.85741e-05	0.000164413
Cosmopolitan	Mrs_Fisher	Mrs_Fisher	Fragaria x ananassa	Giant_Component	Marginal	2	0	2	0	NA	5.85741e-05	0.000164413
Cosmopolitan	Mrs_Garfield	Mrs_Garfield	Fragaria x ananassa	Giant_Component	Marginal	1	0	1	0	NA	5.85741e-05	0.000164413
Cosmopolitan	Multnomah	Multnomah	Fragaria x ananassa	Giant_Component	Marginal	2	0	2	0	NA	6.37223e-05	0.000164413
Cosmopolitan	Muncheberger_Fruhe	Muncheberger_Fruhe	Fragaria x ananassa	Giant_Component	Marginal	2	0	2	0	NA	5.85741e-05	0.000164413
Cosmopolitan	Murano	Murano	Fragaria x ananassa	Halo	Marginal	2	0	2	0	NA	5.85741e-05	0.000164413
Cosmopolitan	Musica	Musica	Fragaria x ananassa	Halo	Marginal	0	0	0	0	0	5.85741e-05	0.000164413
Cosmopolitan	Myongbo	Myongbo	Fragaria x ananassa	Giant_Component	Marginal	1	0	1	0	NA	5.85741e-05	0.000164413
Cosmopolitan	Myrtle_Murrell	Myrtle_Murrell	Fragaria x ananassa	Giant_Component	Marginal	2	0	2	0	NA	5.85741e-05	0.000164413
Cosmopolitan	Nabila	Nabila	Fragaria x ananassa	Giant_Component	Marginal	2	0	2	0	NA	5.85741e-05	0.000164413
Cosmopolitan	Naiad	Naiad	Fragaria x ananassa	Giant_Component	Marginal	2	0	2	0	NA	7.33884e-05	0.000164413
Cosmopolitan	Nama	Nama	Fragaria x ananassa	Giant_Component	Marginal	2	0	2	0	NA	5.85741e-05	0.000164413
Cosmopolitan	Nancy	Nancy	Fragaria x ananassa	Halo	Marginal	0	0	0	0	0	5.85741e-05	0.000164413
Cosmopolitan	Nandi	Nandi	Fragaria x ananassa	Halo	Marginal	0	0	0	0	0	5.85741e-05	0.000164413
Cosmopolitan	Napoleon_III	Napoleon_III	Fragaria x ananassa	Giant_Component	Marginal	1	0	1	0	NA	5.85741e-05	0.000164413
Cosmopolitan	Naratoga	Naratoga	Fragaria x ananassa	Giant_Component	Marginal	2	0	2	0	NA	6.24058e-05	0.000164413
Cosmopolitan	Narrow_Leaf_Scarlet	Narrow_Leaf_Scarlet	Fragaria x ananassa	Halo	Marginal	2	0	2	0	NA	5.85741e-05	0.000164413
Cosmopolitan	Natsuakari	Natsuakari	Fragaria x ananassa	Giant_Component	Marginal	2	0	2	0	NA	5.90333e-05	0.000164413
Cosmopolitan	Nauvoo	Nauvoo	Fragaria x ananassa	Giant_Component	Marginal	1	0	1	0	NA	5.85741e-05	0.000164413
Cosmopolitan	NC_2967	NC_2967	Fragaria x ananassa	Giant_Component	Locally_Central	2	2	4	74.0667	NA	9.19086e-05	0.000164413
Cosmopolitan	Nectarena	Nectarena	Fragaria x ananassa	Giant_Component	Marginal	2	0	2	0	NA	5.85741e-05	0.000164413
Cosmopolitan	Nedspride	Nedspride	Fragaria x ananassa	Giant_Component	Marginal	2	0	2	0	NA	7.04792e-05	0.000164413
Cosmopolitan	Nehring	Nehring	Fragaria x ananassa	Giant_Component	Marginal	1	0	1	0	NA	5.85741e-05	0.000164413
Cosmopolitan	Nerina	Nerina	Fragaria x ananassa	Halo	Marginal	0	0	0	0	0	5.85741e-05	0.000164413
Cosmopolitan	Neverfail	Neverfail	Fragaria x ananassa	Giant_Component	Marginal	2	0	2	0	NA	6.31502e-05	0.000164413
Cosmopolitan	New_Deal	New_Deal	Fragaria x ananassa	Giant_Component	Marginal	2	0	2	0	NA	5.85741e-05	0.000164413
Cosmopolitan	New_Dominion	New_Dominion	Fragaria x ananassa	Giant_Component	Marginal	1	0	1	0	NA	5.85741e-05	0.000164413
Cosmopolitan	New_Earliglow	New_Earliglow	Fragaria x ananassa	Giant_Component	Marginal	1	0	1	0	NA	5.85741e-05	0.000164413
Cosmopolitan	New_Ruby	New_Ruby	Fragaria x ananassa	Halo	Marginal	0	0	0	0	0	5.85741e-05	0.000164413
Cosmopolitan	New_Star	New_Star	Fragaria x ananassa	Giant_Component	Locally_Central	1	2	3	148	NA	5.85741e-05	0.000164413
Cosmopolitan	New_Victoria	New_Victoria	Fragaria x ananassa	Giant_Component	Marginal	2	0	2	0	NA	5.85741e-05	0.000164413
Cosmopolitan	New_York	New_York	Fragaria x ananassa	Giant_Component	Marginal	2	0	2	0	NA	5.85741e-05	0.000164413
Cosmopolitan	Newstar	Newstar	Fragaria x ananassa	Giant_Component	Marginal	1	0	1	0	NA	5.85741e-05	0.000164413
Cosmopolitan	Nicanor	Nicanor	Fragaria x ananassa	Giant_Component	Marginal	2	0	2	0	NA	5.85741e-05	0.000164413
Cosmopolitan	Nicaragua	Nicaragua	Fragaria x ananassa	Giant_Component	Marginal	2	0	2	0	NA	6.58959e-05	0.000164413
Cosmopolitan	Nicola	Nicola	Fragaria x ananassa	Giant_Component	Marginal	1	0	1	0	NA	5.85741e-05	0.000164413
Cosmopolitan	Niebla	Niebla	Fragaria x ananassa	Halo	Marginal	0	0	0	0	0	5.85741e-05	0.000164413
Cosmopolitan	Nieva	Nieva	Fragaria x ananassa	Halo	Marginal	0	0	0	0	0	5.85741e-05	0.000164413
Cosmopolitan	Nile's_Seedling	Nile's_Seedling	Fragaria x ananassa	Giant_Component	Marginal	2	0	2	0	NA	6.31502e-05	0.000164413
Cosmopolitan	Nina	Nina	Fragaria x ananassa	Giant_Component	Marginal	2	0	2	0	NA	5.85741e-05	0.000164413
Cosmopolitan	Ninety_Six	Ninety_Six	Fragaria x ananassa	Giant_Component	Marginal	2	0	2	0	NA	5.85741e-05	0.000164413
Cosmopolitan	Ningyu	Ningyu	Fragaria x ananassa	Giant_Component	Marginal	2	0	2	0	NA	7.21793e-05	0.000164413
Cosmopolitan	Nisqually	Nisqually	Fragaria x ananassa	Giant_Component	Marginal	2	0	2	0	NA	5.85741e-05	0.000164413
Cosmopolitan	No._999_Giant	No._999_Giant	Fragaria x ananassa	Giant_Component	Marginal	1	0	1	0	NA	5.85741e-05	0.000164413
Cosmopolitan	Nobel	Nobel	Fragaria x ananassa	Giant_Component	Marginal	2	0	2	0	NA	6.03356e-05	0.000164413
Cosmopolitan	Nohime	Nohime	Fragaria x ananassa	Giant_Component	Marginal	2	0	2	0	NA	7.08954e-05	0.000164413
Cosmopolitan	Nokomis	Nokomis	Fragaria x ananassa	Giant_Component	Marginal	2	0	2	0	NA	5.85741e-05	0.000164413
Cosmopolitan	Nonda	Nonda	Fragaria x ananassa	Giant_Component	Marginal	2	0	2	0	NA	5.85741e-05	0.000164413
Cosmopolitan	Nonesuch	Nonesuch	Fragaria x ananassa	Giant_Component	Marginal	1	0	1	0	NA	5.85741e-05	0.000164413
Cosmopolitan	Nordika	Nordika	Fragaria x ananassa	Giant_Component	Marginal	2	0	2	0	NA	6.46905e-05	0.000164413
Cosmopolitan	North_Shore	North_Shore	Fragaria x ananassa	Giant_Component	Marginal	1	0	1	0	NA	5.85741e-05	0.000164413
Cosmopolitan	Norwood	Norwood	Fragaria x ananassa	Giant_Component	Marginal	2	0	2	0	NA	5.85741e-05	0.000164413
Cosmopolitan	Nurit	Nurit	Fragaria x ananassa	Giant_Component	Globally_Central	2	2	4	1225.05	NA	0.000646705	0.000164413
Cosmopolitan	NY_299	NY_299	Fragaria x ananassa	Giant_Component	Locally_Central	2	2	4	126	NA	6.41512e-05	0.000164413
Cosmopolitan	Obester	Obester	Fragaria x ananassa	Halo	Marginal	0	0	0	0	0	5.85741e-05	0.000164413
Cosmopolitan	Obilnaja	Obilnaja	Fragaria x ananassa	Giant_Component	Marginal	0	1	1	0	0.00340627	0.000322158	0.000164413
Cosmopolitan	Ocean_City	Ocean_City	Fragaria x ananassa	Giant_Component	Marginal	2	0	2	0	NA	5.85741e-05	0.000164413
Cosmopolitan	Ofra	Ofra	Fragaria x ananassa	Giant_Component	Marginal	2	0	2	0	NA	7.23026e-05	0.000164413
Cosmopolitan	Ohio	Ohio	Fragaria x ananassa	Giant_Component	Marginal	1	0	1	0	NA	5.85741e-05	0.000164413
Cosmopolitan	Ohio_Mammoth	Ohio_Mammoth	Fragaria x ananassa	Giant_Component	Marginal	2	0	2	0	NA	5.85741e-05	0.000164413
Cosmopolitan	Ojai	Ojai	Fragaria x ananassa	Giant_Component	Globally_Central	2	3	5	960	NA	6.02742e-05	0.000164413
Cosmopolitan	Oka	Oka	Fragaria x ananassa	Giant_Component	Marginal	2	0	2	0	NA	6.29234e-05	0.000164413
Cosmopolitan	Okmae	Okmae	Fragaria x ananassa	Giant_Component	Marginal	2	0	2	0	NA	6.87949e-05	0.000164413
Cosmopolitan	Old_John_Brown	Old_John_Brown	Fragaria x ananassa	Giant_Component	Marginal	2	0	2	0	NA	5.85741e-05	0.000164413
Cosmopolitan	Olga_Petrova	Olga_Petrova	Fragaria x ananassa	Giant_Component	Marginal	1	0	1	0	NA	5.85741e-05	0.000164413
Cosmopolitan	Olive	Olive	Fragaria x ananassa	Giant_Component	Marginal	1	0	1	0	NA	5.85741e-05	0.000164413
Cosmopolitan	Oliver_Goldsmith	Oliver_Goldsmith	Fragaria x ananassa	Giant_Component	Marginal	2	0	2	0	NA	5.85741e-05	0.000164413
Cosmopolitan	Omega	Omega	Fragaria x ananassa	Giant_Component	Marginal	2	0	2	0	NA	5.85741e-05	0.000164413
Cosmopolitan	Ona	Ona	Fragaria x ananassa	Giant_Component	Marginal	2	0	2	0	NA	5.85741e-05	0.000164413
Cosmopolitan	Onega	Onega	Fragaria x ananassa	Giant_Component	Marginal	2	0	2	0	NA	6.12485e-05	0.000164413
Cosmopolitan	Oneida	Oneida	Fragaria x ananassa	Giant_Component	Marginal	1	0	1	0	NA	5.85741e-05	0.000164413
Cosmopolitan	Onondaga	Onondaga	Fragaria x ananassa	Giant_Component	Marginal	2	0	2	0	NA	5.85741e-05	0.000164413
Cosmopolitan	Onward	Onward	Fragaria x ananassa	Giant_Component	Marginal	2	0	2	0	NA	6.58959e-05	0.000164413
Cosmopolitan	Oom_Paul	Oom_Paul	Fragaria x ananassa	Giant_Component	Marginal	2	0	2	0	NA	5.85741e-05	0.000164413
Cosmopolitan	Oonishiki	Oonishiki	Fragaria x ananassa	Giant_Component	Marginal	2	0	2	0	NA	8.05761e-05	0.000164413
Cosmopolitan	Opera	Opera	Fragaria x ananassa	Halo	Marginal	0	0	0	0	0	5.85741e-05	0.000164413
Cosmopolitan	Ophelia	Ophelia	Fragaria x ananassa	Halo	Marginal	0	1	1	0	0	5.85741e-05	0.000164413
Cosmopolitan	Ophelia_1855	Ophelia_1855	Fragaria x ananassa	Halo	Marginal	1	0	1	0	NA	5.85741e-05	0.000164413
Cosmopolitan	Ophelia_1906	Ophelia_1906	Fragaria x ananassa	Giant_Component	Marginal	1	0	1	0	NA	5.85741e-05	0.000164413
Cosmopolitan	Oranda	Oranda	Fragaria x ananassa	Giant_Component	Marginal	2	0	2	0	NA	5.87994e-05	0.000164413
Cosmopolitan	Oregon	Oregon	Fragaria x ananassa	Giant_Component	Marginal	2	0	2	0	NA	5.85741e-05	0.000164413
Cosmopolitan	Oregon_Everbearing	Oregon_Everbearing	Fragaria x ananassa	Giant_Component	Marginal	1	0	1	0	NA	5.85741e-05	0.000164413
Cosmopolitan	Orem	Orem	Fragaria x ananassa	Giant_Component	Marginal	2	0	2	0	NA	5.85741e-05	0.000164413
Cosmopolitan	Orient	Orient	Fragaria x ananassa	Giant_Component	Marginal	1	0	1	0	NA	5.85741e-05	0.000164413
Cosmopolitan	Oriole	Oriole	Fragaria x ananassa	Giant_Component	Marginal	2	0	2	0	NA	5.85741e-05	0.000164413
Cosmopolitan	Orion	Orion	Fragaria x ananassa	Giant_Component	Marginal	2	0	2	0	NA	5.85741e-05	0.000164413
Cosmopolitan	Orleans	Orleans	Fragaria x ananassa	Giant_Component	Marginal	2	1	3	118.5	NA	6.77631e-05	0.000164413
Cosmopolitan	Orlets	Orlets	Fragaria x ananassa	Giant_Component	Marginal	2	0	2	0	NA	5.85741e-05	0.000164413
Cosmopolitan	Orly	Orly	Fragaria x ananassa	Halo	Marginal	0	0	0	0	0	5.85741e-05	0.000164413
Cosmopolitan	Osara	Osara	Fragaria x ananassa	Giant_Component	Marginal	0	1	1	0	0	5.85741e-05	0.000164413
Cosmopolitan	Osceola	Osceola	Fragaria x ananassa	Giant_Component	Marginal	2	0	2	0	NA	5.85741e-05	0.000164413
Cosmopolitan	Osiris	Osiris	Fragaria x ananassa	Halo	Marginal	0	0	0	0	0	5.85741e-05	0.000164413
Cosmopolitan	Ossie	Ossie	Fragaria x ananassa	Giant_Component	Marginal	1	0	1	0	NA	5.85741e-05	0.000164413
Cosmopolitan	Oswego	Oswego	Fragaria x ananassa	Giant_Component	Marginal	2	0	2	0	NA	5.85741e-05	0.000164413
Cosmopolitan	Otlichnitsa	Otlichnitsa	Fragaria x ananassa	Giant_Component	Marginal	2	0	2	0	NA	5.95448e-05	0.000164413
Cosmopolitan	Otomegokoro	Otomegokoro	Fragaria x ananassa	Giant_Component	Marginal	2	0	2	0	NA	5.85741e-05	0.000164413
Cosmopolitan	Outlander	Outlander	Fragaria x ananassa	Giant_Component	Marginal	2	0	2	0	NA	5.85741e-05	0.000164413
Cosmopolitan	Ovation_2006	Ovation_2006	Fragaria x ananassa	Giant_Component	Marginal	2	0	2	0	NA	5.85741e-05	0.000164413
Cosmopolitan	Ozariwanka	Ozariwanka	Fragaria x ananassa	Halo	Marginal	0	0	0	0	0	5.85741e-05	0.000164413
Cosmopolitan	Ozeharuka	Ozeharuka	Fragaria x ananassa	Giant_Component	Marginal	2	0	2	0	NA	5.94948e-05	0.000164413
Cosmopolitan	Palatina	Palatina	Fragaria x ananassa	Giant_Component	Marginal	2	0	2	0	NA	7.00901e-05	0.000164413
Cosmopolitan	Pamyatnaya	Pamyatnaya	Fragaria x ananassa	Halo	Marginal	0	0	0	0	0	5.85741e-05	0.000164413
Cosmopolitan	Panon	Panon	Fragaria x ananassa	Halo	Marginal	0	0	0	0	0	5.85741e-05	0.000164413
Cosmopolitan	Panvik	Panvik	Fragaria x ananassa	Halo	Marginal	0	0	0	0	0	5.85741e-05	0.000164413
Cosmopolitan	Papa_Lange	Papa_Lange	Fragaria x ananassa	Giant_Component	Marginal	2	0	2	0	NA	5.85741e-05	0.000164413
Cosmopolitan	Paradise	Paradise	Fragaria x ananassa	Giant_Component	Marginal	0	0	0	0	0	5.85741e-05	0.000164413
Cosmopolitan	Paragon	Paragon	Fragaria x ananassa	Giant_Component	Marginal	2	0	2	0	NA	5.85741e-05	0.000164413
Cosmopolitan	Parcell	Parcell	Fragaria x ananassa	Giant_Component	Marginal	2	0	2	0	NA	6.14342e-05	0.000164413
Cosmopolitan	Paris_King	Paris_King	Fragaria x ananassa	Giant_Component	Marginal	1	0	1	0	NA	5.85741e-05	0.000164413
Cosmopolitan	Parisienne_Belle	Parisienne_Belle	Fragaria x ananassa	Giant_Component	Marginal	2	0	2	0	NA	5.85741e-05	0.000164413
Cosmopolitan	Parisienne_Kiss	Parisienne_Kiss	Fragaria x ananassa	Giant_Component	Marginal	2	0	2	0	NA	5.99063e-05	0.000164413
Cosmopolitan	Park_Beauty	Park_Beauty	Fragaria x ananassa	Giant_Component	Marginal	1	0	1	0	NA	5.85741e-05	0.000164413
Cosmopolitan	Parker_1910	Parker_1910	Fragaria x ananassa	Giant_Component	Marginal	2	0	2	0	NA	5.85741e-05	0.000164413
Cosmopolitan	Parker_1948	Parker_1948	Fragaria x ananassa	Giant_Component	Marginal	2	0	2	0	NA	6.28151e-05	0.000164413
Cosmopolitan	Parker_Earle_Improved	Parker_Earle_Improved	Fragaria x ananassa	Giant_Component	Marginal	1	0	1	0	NA	5.85741e-05	0.000164413
Cosmopolitan	Parker_Earle_Jr	Parker_Earle_Jr	Fragaria x ananassa	Giant_Component	Marginal	1	0	1	0	NA	5.85741e-05	0.000164413
Cosmopolitan	Paros	Paros	Fragaria x ananassa	Giant_Component	Marginal	2	0	2	0	NA	6.02562e-05	0.000164413
Cosmopolitan	Pasichna	Pasichna	Fragaria x ananassa	Giant_Component	Marginal	2	0	2	0	NA	5.85741e-05	0.000164413
Cosmopolitan	Pastel	Pastel	Fragaria x ananassa	Giant_Component	Marginal	2	0	2	0	NA	5.93346e-05	0.000164413
Cosmopolitan	Patience	Patience	Fragaria x ananassa	Giant_Component	Marginal	2	0	2	0	NA	5.85741e-05	0.000164413
Cosmopolitan	Patrycja	Patrycja	Fragaria x ananassa	Halo	Marginal	0	0	0	0	0	5.85741e-05	0.000164413
Cosmopolitan	Paul_Jones	Paul_Jones	Fragaria x ananassa	Giant_Component	Marginal	2	0	2	0	NA	5.94894e-05	0.000164413
Cosmopolitan	Pavana	Pavana	Fragaria x ananassa	Giant_Component	Marginal	2	0	2	0	NA	6.06794e-05	0.000164413
Cosmopolitan	Payday	Payday	Fragaria x ananassa	Giant_Component	Marginal	1	0	1	0	NA	5.85741e-05	0.000164413
Cosmopolitan	Peak's_Emperor	Peak's_Emperor	Fragaria x ananassa	Giant_Component	Marginal	2	0	2	0	NA	7.68786e-05	0.000164413
Cosmopolitan	Pearl_1913	Pearl_1913	Fragaria x ananassa	Halo	Marginal	2	0	2	0	NA	5.85741e-05	0.000164413
Cosmopolitan	Pearl_2000	Pearl_2000	Fragaria x ananassa	Giant_Component	Marginal	2	0	2	0	NA	5.85741e-05	0.000164413
Cosmopolitan	Pechika	Pechika	Fragaria x ananassa	Giant_Component	Marginal	2	0	2	0	NA	5.89071e-05	0.000164413
Cosmopolitan	Peerless	Peerless	Fragaria x ananassa	Giant_Component	Marginal	2	0	2	0	NA	6.58959e-05	0.000164413
Cosmopolitan	Pegat	Pegat	Fragaria x ananassa	Giant_Component	Marginal	2	0	2	0	NA	6.92046e-05	0.000164413
Cosmopolitan	Peles	Peles	Fragaria x ananassa	Halo	Marginal	0	0	0	0	0	5.85741e-05	0.000164413
Cosmopolitan	Peltata	Peltata	Fragaria x ananassa	Giant_Component	Marginal	2	0	2	0	NA	5.85741e-05	0.000164413
Cosmopolitan	Pemica	Pemica	Fragaria x ananassa	Giant_Component	Marginal	2	0	2	0	NA	6.25411e-05	0.000164413
Cosmopolitan	Pennholm	Pennholm	Fragaria x ananassa	Giant_Component	Marginal	1	0	1	0	NA	5.85741e-05	0.000164413
Cosmopolitan	Pennsylvania	Pennsylvania	Fragaria x ananassa	Giant_Component	Marginal	1	0	1	0	NA	5.85741e-05	0.000164413
Cosmopolitan	Perfection	Perfection	Fragaria x ananassa	Giant_Component	Marginal	2	0	2	0	NA	5.85741e-05	0.000164413
Cosmopolitan	Perfecto	Perfecto	Fragaria x ananassa	Giant_Component	Marginal	1	0	1	0	NA	5.85741e-05	0.000164413
Cosmopolitan	Perfumed_Pine	Perfumed_Pine	Fragaria x ananassa	Giant_Component	Marginal	1	0	1	0	NA	5.85741e-05	0.000164413
Cosmopolitan	Perpetual	Perpetual	Fragaria x ananassa	Giant_Component	Marginal	2	0	2	0	NA	5.85741e-05	0.000164413
Cosmopolitan	Pervagata	Pervagata	Fragaria x ananassa	Giant_Component	Marginal	2	0	2	0	NA	5.85741e-05	0.000164413
Cosmopolitan	Phelps	Phelps	Fragaria x ananassa	Giant_Component	Marginal	2	0	2	0	NA	6.22493e-05	0.000164413
Cosmopolitan	Phenomenal	Phenomenal	Fragaria x ananassa	Giant_Component	Marginal	1	0	1	0	NA	5.85741e-05	0.000164413
Cosmopolitan	Phil_Sheridan	Phil_Sheridan	Fragaria x ananassa	Giant_Component	Marginal	2	0	2	0	NA	5.85741e-05	0.000164413
Cosmopolitan	Phillips	Phillips	Fragaria x ananassa	Giant_Component	Marginal	2	0	2	0	NA	5.85741e-05	0.000164413
Cosmopolitan	PI231090	Marshall_1956	Fragaria x ananassa	Giant_Component	Marginal	2	0	2	0	NA	5.85741e-05	0.000164413
Cosmopolitan	PI278847	Giant_Framboise_OP	Fragaria x ananassa	Giant_Component	Marginal	1	0	1	0	NA	5.85741e-05	0.000164413
Cosmopolitan	PI551399	Badgerbelle	Fragaria x ananassa	Giant_Component	Marginal	2	0	2	0	NA	6.48127e-05	0.000164413
Cosmopolitan	PI551402	Comet	Fragaria x ananassa	Giant_Component	Marginal	2	1	3	227.502	NA	0.000192529	0.000164413
Cosmopolitan	PI551404	Sumner	Fragaria x ananassa	Giant_Component	Marginal	2	0	2	0	NA	6.55701e-05	0.000164413
Cosmopolitan	PI551405	Vermilion	Fragaria x ananassa	Giant_Component	Marginal	2	0	2	0	NA	6.63821e-05	0.000164413
Cosmopolitan	PI551408	Perle_de_Prague	Fragaria x ananassa	Halo	Marginal	0	0	0	0	0	5.85741e-05	0.000164413
Cosmopolitan	PI551413	Marlate_1969	Fragaria x ananassa	Giant_Component	Globally_Central	2	2	4	746.777	NA	0.000308815	0.000164413
Cosmopolitan	PI551419	Pai_Yu	Fragaria x ananassa	Halo	Marginal	0	0	0	0	0	5.85741e-05	0.000164413
Cosmopolitan	PI551420	Orland	Fragaria x ananassa	Giant_Component	Marginal	2	0	2	0	NA	5.85741e-05	0.000164413
Cosmopolitan	PI551424	Koralovaya	Fragaria x ananassa	Halo	Marginal	0	0	0	0	0	5.85741e-05	0.000164413
Cosmopolitan	PI551429	Ft._Laramie	Fragaria x ananassa	Giant_Component	Globally_Central	2	10	12	657.857	NA	6.10414e-05	0.000164413
Cosmopolitan	PI551430	Sentinel	Fragaria x ananassa	Giant_Component	Marginal	2	0	2	0	NA	7.19189e-05	0.000164413
Cosmopolitan	PI551431	Massey	Fragaria x ananassa	Giant_Component	Globally_Central	2	19	21	2399.17	NA	0.00171658	0.000164413
Cosmopolitan	PI551433	Redchief	Fragaria x ananassa	Giant_Component	Globally_Central	2	6	8	673.917	NA	0.000241602	0.000164413
Cosmopolitan	PI551439	Apollo	Fragaria x ananassa	Giant_Component	Marginal	2	0	2	0	NA	6.51574e-05	0.000164413
Cosmopolitan	PI551440	Big_Joe	Fragaria x ananassa	Giant_Component	Marginal	2	0	2	0	NA	5.85741e-05	0.000164413
Cosmopolitan	PI551476	Liberation_d'Orleans	Fragaria x ananassa	Halo	Marginal	0	0	0	0	0	5.85741e-05	0.000164413
Cosmopolitan	PI551480	Ourown	Fragaria x ananassa	Giant_Component	Marginal	2	0	2	0	NA	5.85741e-05	0.000164413
Cosmopolitan	PI551481	Tangi	Fragaria x ananassa	Giant_Component	Locally_Central	2	3	5	6	NA	5.85741e-05	0.000164413
Cosmopolitan	PI551484	Fletcher	Fragaria x ananassa	Giant_Component	Marginal	2	0	2	0	NA	6.70703e-05	0.000164413
Cosmopolitan	PI551485	Darrow	Fragaria x ananassa	Giant_Component	Locally_Central	2	2	4	54.3167	NA	6.80512e-05	0.000164413
Cosmopolitan	PI551486	Garnet	Fragaria x ananassa	Giant_Component	Marginal	2	0	2	0	NA	6.70703e-05	0.000164413
[truncated: 3,297 more rows]
